# Supplementary material for: Development of Oral Care Chip, a novel device for quantitative detection of the oral microbiota associated with periodontal disease
Source: PLoS One. 2020 Feb 28;15(2):e0229485. doi: 10.1371/journal.pone.0229485 (PMC7048280; doi:10.1371/journal.pone.0229485)
Supplement: S2 File — (XLSX) [file pone.0229485.s002.xlsx]

## Sheet: Oral Care Chip data
	Sample	MSA-1003	MSA-1003	MSA-1003	MSA-1003	MSA-1003	MSA-1003	MSA-1003	MSA-1003	MSA-1003	MSA-1003	MSA-1003	MSA-1003	MSA-1003	MSA-1003	MSA-1003	MSA-1003	MSA-1003	MSA-1003	MSA-1003	MSA-1003	MSA-1003	MSA-1003	MSA-1003	MSA-1003	MSA-1003	MSA-1003	MSA-1003			Sample	Plasmid DNA	Plasmid DNA	Plasmid DNA	Plasmid DNA	Plasmid DNA	Plasmid DNA	Plasmid DNA	Plasmid DNA	Plasmid DNA	Plasmid DNA	Plasmid DNA	Plasmid DNA	Plasmid DNA	Plasmid DNA	Plasmid DNA	Plasmid DNA	Plasmid DNA	Plasmid DNA
	No.	1-1	1-2	1-3	2-1	2-2	2-3	3-1	3-2	3-3	4-1	4-2	4-3	5-1	5-2	5-3	6-1	6-2	6-3	7-1	7-2	7-3	8-1	8-2	8-3	9-1	9-2	9-3			Bacteria	P. gingivalis	P. gingivalis	P. gingivalis	P. gingivalis	T. forsythia	T. forsythia	T. forsythia	T. forsythia	T. denticola	T. denticola	T. denticola	T. denticola	C. rectus	C. rectus	C. rectus	C. rectus	F. nucleatum subsp. animalis	F. nucleatum subsp. animalis
	amol/PCR template	187.702	187.702	187.702	46.9255	46.9255	46.9255	11.7314	11.7314	11.7314	2.93284	2.93284	2.93284	0.73321	0.73321	0.73321	0.183303	0.183303	0.183303	0.0458256	0.0458256	0.0458256	0.0114564	0.0114564	0.0114564	0.0028641	0.0028641	0.0028641			Accession No.	AB035459	AB035459	AB035459	AB035459	AP013045	AP013045	AP013045	AP013045	AE017227	AE017227	AE017227	AE017227	ACFU01000050	ACFU01000050	ACFU01000050	ACFU01000050	CP022124	CP022124
																															fmol/hybridization	1000	250	62.5	15.625	1000	250	62.5	15.625	1000	250	62.5	15.625	699.533	174.883	43.7208	10.9302	1000	250
Probe No.	5spot median(SI)																													Probe No.	5spot median(SI)
-	Control DNA	37843	42175	41719	129033	154337	141343	453666	448650	421749	769180	701700	725409	1038187	997152	1102704	1106807	1098144	1025877	1052094	1091077	1170639	1115470	1078994	1199364	964096	1073979	1085606		-	Control DNA	873	359	230	200	824	341	230	189	454	235	199	195	400	239	202	188	645	300
01	Total bacteria	1195033	1239715	1244047	1169728	1358717	1320645	1277559	1255217	1178163	1176339	1125273	1071471	1027929	1016530	1056653	703068	641515	643795	301836	314374	336032	106691	102816	104183	27370	29930	30776		01	Total bacteria	192865	46506	10225	1902	167788	39895	9712	2279	93697	22388	5259	1245	207455	50154	11465	3028	392113	98028
02	Porphyromonas gingivalis	206315	219766	227517	172347	195373	192409	169612	169840	156617	134960	126981	137240	97344	97800	109883	50610	46734	44911	17517	16577	18042	4886	4888	4816	1157	1364	1506		02	Porphyromonas gingivalis	156389	32943	7116	1416	280	217	198	179	232	199	188	197	250	200	196	183	262	195
03	Tannerella forsythia	414	1087	479	738	505	590	730	707	673	631	600	688	748	726	676	644	662	619	657	636	612	580	600	570	554	552	545		03	Tannerella forsythia	248	203	195	191	737491	211787	43087	9079	239	190	186	194	229	198	192	185	246	195
04	Treponema denticola	692	1501	907	1184	768	848	824	818	760	747	742	764	856	850	711	656	689	621	584	562	544	458	479	426	422	412	435		04	Treponema denticola	350	207	204	194	302	239	196	196	538243	140431	28953	5778	255	210	195	187	326	221
04	Campylobacter rectus	405	758	448	641	423	529	490	498	483	541	426	486	528	457	415	378	435	355	384	374	340	307	365	286	291	280	299		04	Campylobacter rectus	222	201	191	191	296	213	195	185	204	183	188	194	256697	58133	12861	3237	236	198
05	Fusobacterium nucleatum subsp. animalis	382	868	417	635	435	535	530	533	511	469	439	483	515	492	457	436	468	407	435	417	397	367	389	346	343	343	355		05	Fusobacterium nucleatum subsp. animalis	214	197	189	189	250	205	189	183	221	188	187	187	216	191	184	182	266956	60185
06	Fusobacterium nucleatum subsp. nucleatum	496	914	590	752	548	622	555	581	561	543	520	546	568	546	501	455	480	432	439	411	391	348	385	326	331	328	338		06	Fusobacterium nucleatum subsp. nucleatum	226	200	198	193	233	201	194	190	276	207	191	202	223	204	192	193	70899	17051
08	Prevotella intermedia	395	733	429	627	417	505	467	480	464	475	417	449	484	441	400	372	419	349	391	375	341	305	359	280	283	277	295		08	Prevotella intermedia	209	195	189	190	274	227	198	196	243	230	193	188	215	187	182	180	236	194
09	Prevotella nigrescens	402	773	422	646	443	524	488	517	487	475	450	473	505	486	444	401	429	377	416	386	358	334	362	315	315	311	321		09	Prevotella nigrescens	229	192	190	187	230	198	195	182	241	199	186	189	210	191	188	182	260	204
10	Streptococcus constellatus	5515	6164	5854	5429	5772	5980	5810	5441	5379	5294	5030	5265	4828	4747	5003	3420	3398	3328	1663	1686	1726	689	741	641	391	388	423		10	Streptococcus constellatus	217	192	194	188	217	197	194	188	224	191	189	195	215	195	188	186	250	204
11	Aggregatibacter actinomycetemcomitans	399	744	419	623	405	494	455	474	450	473	402	475	489	433	391	369	413	341	384	351	328	295	350	271	279	267	296		11	Aggregatibacter actinomycetemcomitans	210	188	187	188	215	195	191	178	220	190	183	193	212	190	184	182	220	191
12	Capnocytophaga gingivalis	416	760	451	657	442	532	478	509	484	472	442	466	511	469	435	397	417	375	391	374	347	317	349	300	296	295	312		12	Capnocytophaga gingivalis	217	197	199	191	217	191	196	184	226	190	190	196	210	194	191	187	242	196
13	Streptococcus gordonii	429	791	477	676	459	566	494	505	491	515	438	483	516	468	435	403	443	378	396	376	347	318	354	292	293	293	328		13	Streptococcus gordonii	220	195	195	192	212	207	195	182	207	186	199	195	208	192	193	188	226	194
14	Streptococcus intermedius	407	752	432	655	423	516	468	489	455	479	419	461	463	443	405	378	480	348	390	366	338	306	355	277	287	282	312		14	Streptococcus intermedius	210	185	187	189	208	195	184	178	207	188	182	188	207	185	186	187	218	187
15	Veillonella parvula	311	375	718	413	612	419	511	461	484	464	434	407	443	450	451	397	376	387	350	371	352	330	303	328	275	277	270		15	Veillonella parvula	200	185	187	182	205	195	186	173	212	193	182	182	198	185	182	177	210	185
16	Actinomyces viscosus	392	712	426	613	431	525	473	492	466	437	431	441	476	455	416	372	397	361	378	357	341	305	333	279	282	274	294		16	Actinomyces viscosus	204	193	191	194	210	195	191	181	212	186	186	189	204	192	191	189	218	192
17	Selenomonas noxia	444	766	477	663	465	562	514	524	495	492	451	492	521	475	448	402	458	377	384	362	348	300	332	277	285	268	314		17	Selenomonas noxia	207	196	192	185	209	195	190	179	205	185	189	194	201	189	189	185	220	191
18	streptococci	303888	324633	330560	298188	351534	346518	335804	331928	309131	318934	308675	311867	282914	280406	306167	206771	200844	193549	87086	93241	100764	30776	28953	30092	8087	8588	8777		18	streptococci	210	194	195	188	207	192	195	180	236	202	195	192	202	195	191	191	232	191
	Blank median(SI)+3σ	592.851	917.133	586.044	813.505	591.754	679.005	637.357	671.211	631.138	671.877	633.294	674.714	724.467	677.942	662.721	585.305	642.157	560.723	577.105	528.786	517.106	473.75	499.508	456.372	425.539	451.35	446.929			Blank median(SI)+3σ	316.383	270.875	227.838	227.637	266.923	219.942	207.591	205.368	259.986	210.135	212.377	203.034	238.421	213.437	207.146	209.051	321.78	228.191
	Blank median(SI)	416	728	425	643	424.5	503.5	451	486	449	467	412	480.5	475	445.5	401.5	366	438.5	346	380	355	339	299	340	279.5	283	282.5	299			Blank median(SI)	248.5	240.5	210	210	215.5	200	192	190	206.5	189	189.5	184.5	201	190	188	182	233.5	191.5
Probe No.	5spot median-blank median (SI)																													Probe No.	5spot median-blank median (SI)
-	Control DNA	37427	41447	41294	128390	153912	140840	453215	448164	421300	768713	701288	724928	1037712	996706	1.1023e+06	1106441	1.09771e+06	1025531	1051714	1090722	1170300	1115171	1078654	1.19908e+06	963813	1.0737e+06	1085307		-	Control DNA	624.5	118.5	20	0	608.5	141	38	0	247.5	46	0	0	199	49	0	0	411.5	108.5
01	Total bacteria	1194617	1238987	1243622	1169085	1.35829e+06	1.32014e+06	1277108	1254731	1177714	1175872	1124861	1.07099e+06	1027454	1.01608e+06	1.05625e+06	702702	641076	643449	301456	314019	335693	106392	102476	103904	27087	29647.5	30477		01	Total bacteria	192616	46265.5	10015	1692	167572	39695	9520	2089	93490.5	22199	5069.5	1060.5	207254	49964	11277	2846	391880	97836.5
02	Porphyromonas gingivalis	205899	219038	227092	171704	194948	191906	169161	169354	156168	134493	126569	136760	96869	97354.5	109482	50244	46295.5	44565	17137	16222	17703	4587	4548	4536.5	874	1081.5	1207		02	Porphyromonas gingivalis	156140	32702.5	6906	1206	64.5	0	0	0	0	0	0	0	49	0	0	0	0	0
03	Tannerella forsythia	0	359	0	0	0	0	279	221	224	0	0	207.5	273	280.5	274.5	278	223.5	273	277	281	273	281	260	290.5	271	269.5	246		03	Tannerella forsythia	0	0	0	0	737276	211587	42895	8889	0	0	0	0	0	0	0	0	0	0
04	Treponema denticola	276	773	482	541	343.5	344.5	373	332	311	280	330	283.5	381	404.5	309.5	290	250.5	275	204	207	205	0	0	0	0	0	0		04	Treponema denticola	101.5	0	0	0	86.5	39	0	0	538036	140242	28763.5	5593.5	54	0	0	0	92.5	0
04	Campylobacter rectus	0	0	0	0	0	0	0	0	0	0	0	0	0	0	0	0	0	0	0	0	0	0	0	0	0	0	0		04	Campylobacter rectus	0	0	0	0	80.5	0	0	0	0	0	0	0	256496	57943	12673	3055	0	0
05	Fusobacterium nucleatum subsp. animalis	0	0	0	0	0	0	0	0	0	0	0	0	0	0	0	0	0	0	0	0	0	0	0	0	0	0	0		05	Fusobacterium nucleatum subsp. animalis	0	0	0	0	0	0	0	0	0	0	0	0	0	0	0	0	266722	59993.5
06	Fusobacterium nucleatum subsp. nucleatum	0	0	165	0	0	0	0	0	0	0	0	0	0	0	0	0	0	0	0	0	0	0	0	0	0	0	0		06	Fusobacterium nucleatum subsp. nucleatum	0	0	0	0	0	0	0	0	69.5	0	0	0	0	0	0	0	70665.5	16859.5
08	Prevotella intermedia	0	0	0	0	0	0	0	0	0	0	0	0	0	0	0	0	0	0	0	0	0	0	0	0	0	0	0		08	Prevotella intermedia	0	0	0	0	58.5	27	0	0	0	41	0	0	0	0	0	0	0	0
09	Prevotella nigrescens	0	0	0	0	0	0	0	0	0	0	0	0	0	0	0	0	0	0	0	0	0	0	0	0	0	0	0		09	Prevotella nigrescens	0	0	0	0	0	0	0	0	0	0	0	0	0	0	0	0	0	0
10	Streptococcus constellatus	5099	5436	5429	4786	5347.5	5476.5	5359	4955	4930	4827	4618	4784.5	4353	4301.5	4601.5	3054	2959.5	2982	1283	1331	1387	390	401	361.5	0	0	0		10	Streptococcus constellatus	0	0	0	0	0	0	0	0	0	0	0	0	0	0	0	0	0	0
11	Aggregatibacter actinomycetemcomitans	0	0	0	0	0	0	0	0	0	0	0	0	0	0	0	0	0	0	0	0	0	0	0	0	0	0	0		11	Aggregatibacter actinomycetemcomitans	0	0	0	0	0	0	0	0	0	0	0	0	0	0	0	0	0	0
12	Capnocytophaga gingivalis	0	0	0	0	0	0	0	0	0	0	0	0	0	0	0	0	0	0	0	0	0	0	0	0	0	0	0		12	Capnocytophaga gingivalis	0	0	0	0	0	0	0	0	0	0	0	0	0	0	0	0	0	0
13	Streptococcus gordonii	0	0	0	0	0	0	0	0	0	0	0	0	0	0	0	0	0	0	0	0	0	0	0	0	0	0	0		13	Streptococcus gordonii	0	0	0	0	0	0	0	0	0	0	0	0	0	0	0	0	0	0
14	Streptococcus intermedius	0	0	0	0	0	0	0	0	0	0	0	0	0	0	0	0	0	0	0	0	0	0	0	0	0	0	0		14	Streptococcus intermedius	0	0	0	0	0	0	0	0	0	0	0	0	0	0	0	0	0	0
15	Veillonella parvula	0	0	293	0	187.5	0	0	0	0	0	0	0	0	0	0	0	0	0	0	0	0	0	0	0	0	0	0		15	Veillonella parvula	0	0	0	0	0	0	0	0	0	0	0	0	0	0	0	0	0	0
16	Actinomyces viscosus	0	0	0	0	0	0	0	0	0	0	0	0	0	0	0	0	0	0	0	0	0	0	0	0	0	0	0		16	Actinomyces viscosus	0	0	0	0	0	0	0	0	0	0	0	0	0	0	0	0	0	0
17	Selenomonas noxia	0	0	0	0	0	0	0	0	0	0	0	0	0	0	0	0	0	0	0	0	0	0	0	0	0	0	0		17	Selenomonas noxia	0	0	0	0	0	0	0	0	0	0	0	0	0	0	0	0	0	0
18	Streptococci	303472	323905	330135	297545	351110	346014	335353	331442	308682	318467	308263	311386	282439	279960	305766	206405	200406	193203	86706	92886	100425	30477	28613	29812.5	7804	8305.5	8478		18	streptococci	0	0	0	0	0	0	0	0	0	0	0	0	0	0	0	0	0	0
	LOG(Total bacteria (SI)/ControlDNA (SI))	1.50404	1.47557	1.4788	0.959315	0.945719	0.971896	0.449923	0.447114	0.446448	0.184596	0.205202	0.16949	-0.00431445	0.00836254	-0.0185335	-0.197157	-0.233576	-0.202435	-0.542674	-0.540758	-0.542355	-1.02043	-1.02226	-1.06222	-1.55123	-1.55889	-1.55158
	LOG(Total bacteria (amol)/ControlDNA (amol))	2.5745	2.5745	2.5745	1.97244	1.97244	1.97244	1.37038	1.37038	1.37038	0.768319	0.768319	0.768319	0.166259	0.166259	0.166259	-0.435801	-0.435801	-0.435801	-1.03786	-1.03786	-1.03786	-1.63992	-1.63992	-1.63992	-2.24198	-2.24198	-2.24198
	SLOPE	0.568022																													SLOPE 02	0.804667			SLOPE 03	4.44933			SLOPE 04	5.78464			SLOPE 05	1.23298			SLOPE 06	0.676565
	INTERCEPT	-0.12414
																														Probe No.	Bacterial specific probe ratio to sum Sis except probe No.01
																														02	Porphyromonas gingivalis	0.99935				8.74499e-05				0				0.000190959				0
																														03	Tannerella forsythia	0				0.999607				0				0				0
																														04	Treponema denticola	0.000649633				0.000117278				0.999871				0.000210445				0.00027409
																														04	Campylobacter rectus	0				0.000109143				0				0.999599				0
																														05	Fusobacterium nucleatum subsp. animalis	0				0				0				0				0.790335
																														06	Fusobacterium nucleatum subsp. nucleatum	0				0				0.000129157				0				0.209391
																														08	Prevotella intermedia	0				7.9315e-05				0				0				0
																														09	Prevotella nigrescens	0				0				0				0				0
																														10	Streptococcus constellatus	0				0				0				0				0
																														11	Aggregatibacter actinomycetemcomitans	0				0				0				0				0
																														12	Capnocytophaga gingivalis	0				0				0				0				0
																														13	Streptococcus gordonii	0				0				0				0				0
																														14	Streptococcus intermedius	0				0				0				0				0
																														15	Veillonella parvula	0				0				0				0				0
																														16	Actinomyces viscosus	0				0				0				0				0
																														17	Selenomonas noxia	0				0				0				0				0
																														18	streptococci	0				0				0				0				0
[truncated: 252 more columns]

## Sheet: cluster 1
						MIN	2	0	0	0		14407	0	0	0	0	0	0	0	0	0	0	0	0	0	0	0	0	369		1	0	0	0	0	0	0	0	0	0	0	0	0	0	0	0	0	0.010919
						MAX	6	1	2	1		13602500	11182	4513	6723	42795	254870	90635	13369	4353	11681	2036	1879830	1148354	47824	1693	158752	505017	2458829		1	0.0527243	0.0266557	0.0340943	0.016252	0.167484	0.0419045	0.0113397	0.00154681	0.0242141	0.00165584	0.138197	0.343764	0.05303	0.0116007	0.116735	0.0553203	0.575317
						AVG	2.87302	0.0952381	0.253968	0.285714		1.49887e+06	921.476	416.27	335.111	2360.17	7986.79	4416.94	222.286	69.0952	256.508	118.111	31672.6	97337	2571.78	26.873	14137	11042.1	351180		1	0.00225523	0.00104856	0.000861671	0.00193158	0.00626641	0.00358572	0.000254897	2.45525e-05	0.000616217	9.50574e-05	0.00285993	0.0444939	0.00301105	0.000184139	0.0107313	0.00411376	0.188262
						S.E.	0.116468	0.0372801	0.0597325	0.0573728		264741	289.035	102.195	134.757	818.853	4167.82	1595.56	212.283	69.0952	197.502	46.8962	29832.8	27662.6	1032.99	26.873	4116.96	8053.07	70083.1		0	0.000919313	0.000444834	0.000558812	0.000469961	0.00279766	0.000797578	0.000193839	2.45525e-05	0.00044566	3.88979e-05	0.00221079	0.00833847	0.00121908	0.000184139	0.00259688	0.00126776	0.0165579
						MEDIAN	3	0	0	0		667172	0	149	0	0	0	1193	0	0	0	0	0	19212	0	0	1975	0	96839		1	0	0.000233032	0	0	0	0.00150978	0	0	0	0	0	0.0228534	0	0	0.00243571	0	0.173785
						S.D.	0.91707	0.293544	0.470334	0.451754		2.08457e+06	2275.87	804.684	1061.08	6447.65	32817.4	12563.4	1671.52	544.056	1555.14	369.261	234904	217816	8133.75	211.598	32417	63409.9	551835		0	0.00723867	0.00350262	0.00440009	0.00370047	0.0220288	0.00628013	0.00152629	0.000193327	0.00350913	0.000306282	0.0174078	0.0656572	0.00959907	0.00144991	0.0204478	0.00998232	0.130377
	N=	63										genome copy number /paper point																			genome (%)
	GCF No.	Sample ID	Gender	Age	Teeth	BDMLP	PD	BOP	GI	PlI		Total bacteria	Porphyromonas gingivalis	Tannerella forsythia	Treponema denticola	Campylobacter rectus	Fusobacterium nucleatum subsp. animalis	Fusobacterium nucleatum subsp. nucleatum	Prevotella intermedia	Prevotella nigrescens	Streptococcus constellatus	Aggregatibacter actinomycetemcomitans	Capnocytophaga gingivalis	Streptococcus gordonii	Streptococcus intermedius	Veillonella parvula	Actinomyces viscosus	Selenomonas noxia	streptococci		Total bacteria	Porphyromonas gingivalis	Tannerella forsythia	Treponema denticola	Campylobacter rectus	Fusobacterium nucleatum subsp. animalis	Fusobacterium nucleatum subsp. nucleatum	Prevotella intermedia	Prevotella nigrescens	Streptococcus constellatus	Aggregatibacter actinomycetemcomitans	Capnocytophaga gingivalis	Streptococcus gordonii	Streptococcus intermedius	Veillonella parvula	Actinomyces viscosus	Selenomonas noxia	streptococci
	9	5-1-1	F	76	UR1	MB	4	1	1	1		14407	0	0	0	0	205	0	0	0	0	0	0	0	0	0	0	797	369		1	0	0	0	0	0.0142292	0	0	0	0	0	0	0	0	0	0	0.0553203	0.0256125
	10	5-2-1	F	76	UL7	MB	6	0	1	1		30309	421	119	0	0	0	0	0	0	0	0	0	1598	0	0	376	0	4875		1	0.0138903	0.00392623	0	0	0	0	0	0	0	0	0	0.0527236	0	0	0.0124056	0	0.160843
	19	10-1-1	M	29	UR4	MB	5	1	2	1		313603	0	560	0	966	1740	686	0	0	0	0	0	2642	0	0	7814	0	10167		1	0	0.0017857	0	0.00308033	0.00554842	0.00218748	0	0	0	0	0	0.00842466	0	0	0.0249169	0	0.03242
	25	13-1-1	M	28	UL4	MB	4	0	1	1		431505	0	338	248	0	0	429	0	0	0	0	779	148336	666	0	2869	0	179557		1	0	0.000783305	0.000574733	0	0	0.000994195	0	0	0	0	0.00180531	0.343764	0.00154344	0	0.00664882	0	0.416118
	27	14-1-1	F	47	UR6	MB	4	0	1	1		482405	0	4513	1354	6510	7530	3226	0	0	11681	152	0	7745	530	0	1175	0	71389		1	0	0.00935521	0.00280677	0.0134949	0.0156093	0.00668733	0	0	0.0242141	0.000315088	0	0.016055	0.00109866	0	0.00243571	0	0.147986
	71	22-1-1	M	59	LR3	MB	3	0	1	0		339250	0	408	279	4446	1754	920	0	0	0	0	1012	7793	0	0	1281	5092	70132		1	0	0.00120265	0.000822402	0.0131054	0.00517023	0.00271186	0	0	0	0	0.00298305	0.0229713	0	0	0.00377598	0.0150096	0.206727
	85	29-1-1	F	42	LL2	DB	3	0	1	1		577751	0	562	0	1370	2051	3243	0	0	0	0	975	52147	755	0	67444	0	67397		1	0	0.000972737	0	0.00237126	0.00354997	0.00561314	0	0	0	0	0.00168758	0.0902586	0.00130679	0	0.116735	0	0.116654
	99	HC03-1-1	M	44	UL6	M	3	0	0	1		3428398	0	0	641	42795	0	1236	0	0	0	0	73174	136587	0	0	3773	0	1040806		1	0	0	0.000186968	0.0124825	0	0.000360518	0	0	0	0	0.0213435	0.0398399	0	0	0.00110051	0	0.303584
	111	HC07-1-1	M	33	UL6	M	3	0	0	0		5090940	0	0	0	0	0	0	0	0	0	0	0	24492	0	0	4215	0	903095		1	0	0	0	0	0	0	0	0	0	0	0	0.0048109	0	0	0.000827941	0	0.177393
	120	HC10-1-1	F	23	UL6	M	2	0	0	0		1153635	0	0	0	1069	0	1391	0	0	0	0	0	33456	513	0	928	0	530463		1	0	0	0	0.000926636	0	0.00120575	0	0	0	0	0	0.0290005	0.000444681	0	0.000804414	0	0.459819
	126	HC12-1-1	M	40	UL6	M	2	0	0	0		327324	0	0	0	0	0	0	0	0	0	0	0	15574	0	0	697	2422	96839		1	0	0	0	0	0	0	0	0	0	0	0	0.0475798	0	0	0.00212939	0.0073994	0.295851
	129	HC13-1-1	F	22	UL6	M	2	0	0	0		455274	0	346	0	0	0	1456	0	0	0	0	0	2984	0	0	2852	0	84392		1	0	0.000759982	0	0	0	0.00319807	0	0	0	0	0	0.00655429	0	0	0.00626436	0	0.185365
	132	HC14-1-1	M	35	UL6	M	2	0	0	0		5261913	0	0	0	2179	0	1072	0	0	0	0	9743	79982	0	0	0	7304	1627750		1	0	0	0	0.000414108	0	0.000203728	0	0	0	0	0.00185161	0.0152002	0	0	0	0.00138809	0.309346
	136	HC15-2-1	M	51	UR1	M	2	0	0	1		87270	0	149	0	0	0	312	0	0	0	0	0	1284	0	0	474	0	26580		1	0	0.00170735	0	0	0	0.00357511	0	0	0	0	0	0.014713	0	0	0.00543142	0	0.304572
	156	34-1-1	F	26	UL4	MB	4	0	1	0		1229589	1475	1488	673	3265	6313	929	0	0	0	2036	0	225454	0	0	2034	0	184254		1	0.00119959	0.00121016	0.000547337	0.00265536	0.00513424	0.000755537	0	0	0	0.00165584	0	0.183357	0	0	0.00165421	0	0.14985
	161	36-1-1	F	32	UL5	MB	2	1	1	0		2211258	0	849	664	1415	2935	5824	0	0	0	0	0	24725	0	0	158752	0	57678		1	0	0.000383944	0.000300282	0.000639907	0.0013273	0.00263379	0	0	0	0	0	0.0111814	0	0	0.0717926	0	0.0260838
	177	41-1-1	F	43	UL5	MP	4	0	1	0		145939	0	0	0	814	546	1992	0	0	0	0	0	5146	0	1693	6757	4217	20272		1	0	0	0	0.00557767	0.00374129	0.0136495	0	0	0	0	0	0.0352613	0	0.0116007	0.0463002	0.0288956	0.138907
	195	50-1-1	F	61	UL4	MB	4	0	1	1		5189654	0	1007	0	7043	254870	90635	0	0	0	0	15301	561228	3942	0	80570	17879	916970		1	0	0.00019404	0	0.00135712	0.0491112	0.0174646	0	0	0	0	0.00294837	0.108144	0.000759588	0	0.0155251	0.00344512	0.176692
	203	HCN01-1-1	F	23	RU1	MB	3	0	0	0		303021	0	236	0	0	0	0	0	0	0	161	0	543	0	0	0	6907	12285		1	0	0.000778824	0	0	0	0	0	0	0	0.000531316	0	0.00179196	0	0	0	0.0227938	0.0405417
	204	HCN02-1-1	F	23	RU1	MB	2	0	0	0		927991	0	0	0	0	0	0	0	0	0	0	0	1728	0	0	5079	0	15982		1	0	0	0	0	0	0	0	0	0	0	0	0.00186209	0	0	0.00547311	0	0.0172221
	206	HCN04-1-1	F	24	RU1	MB	2	0	0	0		4976302	0	0	647	0	0	0	0	0	0	0	0	112670	3502	0	1975	10100	2458829		1	0	0	0.000130016	0	0	0	0	0	0	0	0	0.0226413	0.000703735	0	0.000396881	0.00202962	0.494108
	208	HCN06-1-1	M	26	RU1	MB	3	0	0	1		616589	0	0	0	944	0	1517	0	0	0	0	0	10964	2517	0	10179	3833	197060		1	0	0	0	0.001531	0	0.00246031	0	0	0	0	0	0.0177817	0.00408214	0	0.0165086	0.00621646	0.319597
	209	HCN07-1-1	M	23	RU1	MB	2	0	0	0		1100438	0	0	0	0	0	1491	0	0	0	0	0	69978	2485	0	10839	0	334956		1	0	0	0	0	0	0.00135492	0	0	0	0	0	0.063591	0.00225819	0	0.00984971	0	0.304384
	210	HCN08-1-1	F	24	RU1	MB	3	0	0	0		1291781	9919	1369	6723	4727	0	2077	0	0	0	393	0	41423	2924	0	5911	2829	566563		1	0.00767855	0.00105978	0.00520444	0.00365929	0	0.00160786	0	0	0	0.000304231	0	0.0320666	0.00226354	0	0.00457585	0.00219	0.438591
	211	HCN09-1-1	M	23	RU1	MB	2	0	0	0		164644	0	0	0	0	0	0	0	0	0	0	0	0	0	0	0	3127	11910		1	0	0	0	0	0	0	0	0	0	0	0	0	0	0	0	0.0189925	0.0723379
	213	HCN11-1-1	F	23	RU1	MB	2	0	0	0		369620	3607	268	0	0	1300	1519	0	0	0	0	0	16193	411	0	0	0	42413		1	0.00975867	0.000725069	0	0	0.00351713	0.00410963	0	0	0	0	0	0.0438099	0.00111195	0	0	0	0.114748
	214	HCN12-1-1	M	27	RU1	MB	3	1	0	1		320251	3702	0	0	0	53637	5124	0	0	0	0	0	1199	9925	0	21367	0	24225		1	0.0115597	0	0	0	0.167484	0.016	0	0	0	0	0	0.00374394	0.0309913	0	0.0667195	0	0.0756438
	215	HCN13-1-1	F	23	RU1	MB	3	0	0	0		813750	1172	365	0	0	0	1835	0	0	0	0	0	23260	0	0	1397	0	125441		1	0.00144025	0.000448541	0	0	0	0.00225499	0	0	0	0	0	0.0285837	0	0	0.00171674	0	0.154152
	217	HCN15-1-1	M	23	RU1	MB	2	0	0	0		3531700	11182	823	728	2303	0	1280	0	0	0	847	0	228984	0	0	76991	0	865559		1	0.00316618	0.000233032	0.000206133	0.000652094	0	0.000362432	0	0	0	0.000239828	0	0.0648368	0	0	0.0218	0	0.245083
	220	HCN18-1-1	F	27	RU1	MB	2	0	0	0		1961466	0	0	0	5939	16958	16184	0	0	0	0	0	81189	47824	0	4823	0	455473		1	0	0	0	0.00302784	0.00864557	0.00825097	0	0	0	0	0	0.041392	0.0243818	0	0.00245888	0	0.23221
	221	HCN19-1-1	M	23	RU6	-	4	0	0	1		2814183	0	699	816	3875	41500	34469	0	4353	0	1683	0	116915	11225	0	0	0	1102651		1	0	0.000248385	0.00028996	0.00137695	0.0147467	0.0122483	0	0.00154681	0	0.000598042	0	0.0415449	0.00398872	0	0	0	0.391819
	222	HCN20-1-1	F	23	RU1	MB	2	0	0	0		336040	0	257	0	0	0	0	0	0	0	0	0	3185	14632	0	1143	0	67389		1	0	0.00076479	0	0	0	0	0	0	0	0	0	0.00947804	0.0435424	0	0.00340138	0	0.200539
	223	HCN21-1-1	F	23	RU1	MB	2	0	0	0		667172	0	0	0	0	0	426	0	0	0	0	0	5510	0	0	0	0	203623		1	0	0	0	0	0	0.000638516	0	0	0	0	0	0.00825874	0	0	0	0	0.305203
	224	HCN22-1-1	F	23	RU1	MB	3	0	0	0		662256	0	0	0	0	0	621	0	0	0	0	0	4645	1901	0	0	0	14044		1	0	0	0	0	0	0.000937704	0	0	0	0	0	0.0070139	0.00287049	0	0	0	0.0212063
	225	HCN23-1-1	M	26	RU1	MB	3	0	0	0		1564650	0	0	0	0	0	997	0	0	0	0	0	13637	0	0	0	0	311357		1	0	0	0	0	0	0.000637203	0	0	0	0	0	0.00871569	0	0	0	0	0.198995
	226	HCN24-1-1	M	23	RU1	MB	3	0	0	0		315337	0	0	0	0	0	1134	0	0	0	0	0	8509	0	0	16051	0	22164		1	0	0	0	0	0	0.00359615	0	0	0	0	0	0.0269838	0	0	0.0509011	0	0.0702867
	227	HCN25-1-1	F	23	RU1	MB	2	0	0	0		575786	6455	922	0	0	20398	2425	0	0	0	0	0	887	0	0	0	0	6287		1	0.0112108	0.00160129	0	0	0.0354264	0.00421163	0	0	0	0	0	0.0015405	0	0	0	0	0.010919
	228	HCN26-1-1	M	23	RU1	MB	3	0	0	0		175032	1444	194	0	0	0	0	0	0	0	0	0	2514	303	0	0	0	5200		1	0.00824992	0.00110837	0	0	0	0	0	0	0	0	0	0.0143631	0.00173111	0	0	0	0.0297089
	229	HCN27-1-1	M	23	RU1	MB	2	1	0	0		2347470	0	0	0	0	21213	18450	0	0	0	0	0	37144	0	0	0	56302	73188		1	0	0	0	0	0.00903654	0.00785953	0	0	0	0	0	0.015823	0	0	0	0.0239841	0.0311774
	231	HCN29-1-1	M	23	RU1	MB	2	0	0	0		1026997	3748	621	422	4459	3317	4518	0	0	0	0	0	38316	0	0	0	0	211879		1	0.00364948	0.000604676	0.000410907	0.00434178	0.0032298	0.00439923	0	0	0	0	0	0.0373088	0	0	0	0	0.206309
	234	HCN32-1-1	M	23	RU1	MB	2	0	0	0		3521924	0	0	540	0	0	0	0	0	0	583	0	156847	0	0	0	0	2026224		1	0	0	0.000153325	0	0	0	0	0	0	0.000165535	0	0.0445345	0	0	0	0	0.575317
	235	HCN33-1-1	M	23	RU1	MB	3	0	0	0		909406	1603	367	0	1213	0	1373	0	0	0	0	0	21937	0	0	5233	0	83850		1	0.00176269	0.00040356	0	0.00133384	0	0.00150978	0	0	0	0	0	0.0241223	0	0	0.00575431	0	0.092203
	236	HCN34-1-1	M	24	RU1	MB	2	0	0	0		118117	0	165	0	0	0	0	0	0	0	0	0	1910	0	0	0	0	6046		1	0	0.00139692	0	0	0	0	0	0	0	0	0	0.0161704	0	0	0	0	0.0511865
	239	HCN37-1-1	F	23	RU1	MB	2	0	0	0		2745009	2227	0	0	0	0	1193	0	0	0	0	0	193096	0	0	101693	0	368536		1	0.000811291	0	0	0	0	0.000434607	0	0	0	0	0	0.0703444	0	0	0.0370465	0	0.134257
	240	HCN38-1-1	M	23	RU1	MB	3	0	0	1		85424	938	138	0	0	0	0	0	0	0	0	0	206	467	0	2181	0	7069		1	0.0109805	0.00161547	0	0	0	0	0	0	0	0	0	0.0024115	0.00546685	0	0.0255315	0	0.0827519
	242	HCN40-1-1	F	23	RU1	MB	3	0	0	0		766736	3065	434	275	0	10457	5904	0	0	0	0	0	21594	40660	0	0	2991	189706		1	0.00399746	0.000566036	0.000358663	0	0.0136383	0.00770017	0	0	0	0	0	0.0281635	0.05303	0	0	0.00390095	0.24742
	245	HCN43-1-1	F	24	RU1	MB	3	0	0	0		2258218	0	0	0	0	0	0	0	0	0	0	0	564972	0	0	10315	0	472317		1	0	0	0	0	0	0	0	0	0	0	0	0.250185	0	0	0.00456776	0	0.209155
	247	HCN45-1-1	M	23	RU1	MB	2	0	0	0		3866093	0	763	0	26837	27470	29095	0	0	0	1036	7497	788361	0	0	7929	44117	1080437		1	0	0.000197357	0	0.00694163	0.00710536	0.00752569	0	0	0	0.000267971	0.00193917	0.203917	0	0	0.00205091	0.0114113	0.279465
	248	HCN46-1-1	F	23	RU1	MB	3	0	0	0		617386	0	319	0	1353	0	2286	0	0	0	0	785	29427	1020	0	0	0	192333		1	0	0.000516695	0	0.0021915	0	0.00370271	0	0	0	0	0.00127149	0.0476639	0.00165213	0	0	0	0.311528
	249	HCN47-1-1	M	25	RU1	MB	3	0	0	0		1508248	0	494	0	6696	2474	4933	0	0	0	0	0	27380	0	0	3436	0	196469		1	0	0.000327532	0	0.00443959	0.00164031	0.00327068	0	0	0	0	0	0.0181535	0	0	0.00227814	0	0.130263
	250	HCN48-1-1	F	24	RU1	MB	3	0	0	0		103968	0	0	0	0	0	0	0	0	0	0	0	719	0	0	0	0	1898		1	0	0	0	0	0	0	0	0	0	0	0	0.00691559	0	0	0	0	0.0182556
	251	HCN49-1-1	M	23	RU1	MB	3	0	0	0		1196062	0	0	0	11115	1709	1855	0	0	0	330	0	14002	3133	0	1269	0	283578		1	0	0	0	0.009293	0.00142886	0.00155092	0	0	0	0.000275905	0	0.0117068	0.00261943	0	0.00106098	0	0.237093
	252	HCN50-1-1	M	24	RU1	MB	3	0	0	0		764368	0	0	0	0	0	0	0	0	0	0	0	11033	0	0	609	0	281680		1	0	0	0	0	0	0	0	0	0	0	0	0.0144341	0	0	0.000796737	0	0.368514
	253	HCN51-1-1	M	24	RU1	MB	3	0	0	0		549324	0	0	0	1289	1005	1852	0	0	0	0	0	23132	0	0	2394	4370	81659		1	0	0	0	0.00234652	0.00182952	0.00337142	0	0	0	0	0	0.0421099	0	0	0.00435808	0.00795523	0.148654
	255	HCN53-1-1	F	23	RU6	-	4	0	0	1		3472197	0	2669	0	0	8452	1126	0	0	0	0	0	861449	11812	0	47605	0	809004		1	0	0.000768678	0	0	0.00243419	0.00032429	0	0	0	0	0	0.248099	0.00340188	0	0.0137103	0	0.232995
	256	HCN54-1-1	M	23	RU1	MB	2	0	0	0		142911	0	157	0	0	0	334	0	0	0	0	0	3266	0	0	1455	0	17890		1	0	0.00109859	0	0	0	0.00233712	0	0	0	0	0	0.0228534	0	0	0.0101812	0	0.125183
	257	HCN55-1-1	F	23	RU1	MB	2	0	0	0		1956197	0	0	0	1623	5533	6828	0	0	0	0	4799	54784	875	0	53308	13213	287924		1	0	0	0	0.000829671	0.00282845	0.00349045	0	0	0	0	0.00245323	0.0280054	0.000447296	0	0.0272508	0.00675443	0.147186
	259	HCN57-1-1	F	23	RU1	MB	2	0	0	0		1178954	0	0	0	0	6872	3965	13369	0	0	0	0	19212	0	0	7624	5133	73887		1	0	0	0	0	0.0058289	0.00336315	0.0113397	0	0	0	0	0.0162958	0	0	0.00646675	0.00435386	0.0626717
	260	HCN58-1-1	M	25	RU1	MB	2	0	0	0		592424	0	337	0	0	0	551	0	0	0	0	0	3827	0	0	0	0	143181		1	0	0.000568849	0	0	0	0.000930077	0	0	0	0	0	0.0064599	0	0	0	0	0.241687
	267	58-1-1	F	68	RU7	MP	4	0	1	1		13602500	0	0	0	0	0	0	0	0	0	0	1879830	1148354	0	0	140268	505017	2363906		1	0	0	0	0	0	0	0	0	0	0	0.138197	0.0844223	0	0	0.0103119	0.0371268	0.173785
	269	59-1-1	F	63	RU6	DP	4	0	1	1		306622	0	439	2514	2259	2212	3317	0	0	4479	0	0	1302	0	0	4302	0	37835		1	0	0.00143173	0.00819902	0.00736738	0.00721409	0.0108179	0	0	0.0146076	0	0	0.00424627	0	0	0.0140303	0	0.123393
	285	73-1-1	F	51	UR5	DB	5	1	1	1		399495	0	263	0	0	0	598	0	0	0	0	1476	34510	0	0	3245	0	94362		1	0	0.000658331	0	0	0	0.00149689	0	0	0	0	0.00369466	0.0863841	0	0	0.00812275	0	0.236203
	314	89-1-1	F	24	UL4	MB	4	0	1	1		134568	7095	3587	4588	2187	717	5639	635	0	0	220	0	343	0	0	0	0	3060		1	0.0527243	0.0266557	0.0340943	0.016252	0.00532816	0.0419045	0.0047188	0	0	0.00163486	0	0.0025489	0	0	0	0	0.0227394
[truncated: 18 more columns]

## Sheet: cluster 2
						MIN	2	0	0	0		1054077	0	0	0	0	0	3044	0	0	0	0	0	8075	0	0	0	0	39606		1	0	0	0	0	0	0.000528508	0	0	0	0	0	0.00419653	0	0	0	0	0.0198177
						MAX	6	1	2	2		30981525	21582	286340	53738	486981	6729195	1720372	47684	148076	322398	19650	248186	1252020	316346	741254	2288962	1560825	8826891		1	0.00818127	0.0191489	0.00852162	0.069491	0.322966	0.323385	0.00228858	0.0153393	0.0430002	0.00496418	0.0232484	0.182458	0.0659696	0.0925857	0.117718	0.167216	0.330272
						AVG	3.36364	0.212121	0.424242	0.878788		7.15409e+06	2603.21	14066.8	3411.73	49977.1	403368	177421	1502.7	10581.8	23793.5	1776.73	31918.2	326459	71597.6	114717	137852	181919	1.23888e+06		1	0.000626826	0.00125365	0.000696262	0.00845794	0.0373409	0.0283971	9.87139e-05	0.00117159	0.00299512	0.000365442	0.00385832	0.0541355	0.0131627	0.0170139	0.0126493	0.0224319	0.16588
						S.E.	0.198566	0.0722681	0.106869	0.121212		1.10903e+06	876.038	9296.75	1616.77	18141.5	207647	63417.6	1444.32	4744.87	12896.1	693.693	9621.6	61637.2	15099.3	34001.4	72514.4	64143.9	277349		0	0.000273934	0.000640158	0.00029818	0.00267067	0.0118688	0.0105635	7.569e-05	0.000511804	0.00170189	0.000160722	0.00101163	0.00987493	0.0029969	0.00442064	0.00428664	0.00735013	0.0166616
						MEDIAN	3	0	0	1		5319882	0	0	921	13713	56591	45703	0	0	0	0	9576	177781	24639	28796	15992	17899	903465		1	0	0	0.000161493	0.00282428	0.0121538	0.0102347	0	0	0	0	0.00191882	0.0388635	0.00619791	0.00478588	0.00328663	0.00393523	0.156684
						S.D.	1.12326	0.40881	0.604544	0.685679		6.27364e+06	4955.62	52590.3	9145.85	102624	1.17463e+06	358744	8170.3	26841	72951.4	3924.12	54428	348673	85414.5	192341	410203	362853	1.56892e+06		0	0.0015252	0.00356425	0.0016602	0.0148697	0.0660825	0.0588153	0.000421424	0.00284961	0.00947574	0.000894864	0.00563252	0.0549813	0.0166861	0.0246131	0.023867	0.0409238	0.0927678
								BOP (%)	-	0.212121
								GI	0	21
									1	10
									2	2
								plI	0	10
									1	17
									2	6
	N=	33										genome copy number /paper point																			genome (%)
	GCF No.	Sample ID	Gender	Age	Teeth	BDMLP	PD	BOP	GI	PlI		Total bacteria	Porphyromonas gingivalis	Tannerella forsythia	Treponema denticola	Campylobacter rectus	Fusobacterium nucleatum subsp. animalis	Fusobacterium nucleatum subsp. nucleatum	Prevotella intermedia	Prevotella nigrescens	Streptococcus constellatus	Aggregatibacter actinomycetemcomitans	Capnocytophaga gingivalis	Streptococcus gordonii	Streptococcus intermedius	Veillonella parvula	Actinomyces viscosus	Selenomonas noxia	streptococci		Total bacteria	Porphyromonas gingivalis	Tannerella forsythia	Treponema denticola	Campylobacter rectus	Fusobacterium nucleatum subsp. animalis	Fusobacterium nucleatum subsp. nucleatum	Prevotella intermedia	Prevotella nigrescens	Streptococcus constellatus	Aggregatibacter actinomycetemcomitans	Capnocytophaga gingivalis	Streptococcus gordonii	Streptococcus intermedius	Veillonella parvula	Actinomyces viscosus	Selenomonas noxia	streptococci
	39	20-1-1	F	38	UR5	MB	4	0	1	1		5126783	0	1943	1685	3639	32596	5817	0	8371	0	0	9608	80661	22439	230760	83821	365617	532441		1	0	0.00037899	0.000328666	0.000709802	0.00635798	0.00113463	0	0.0016328	0	0	0.00187408	0.0157333	0.00437682	0.0450107	0.0163496	0.0713151	0.103855
	69	21-1-1	M	59	UL6	MP	3	0	1	1		20835587	10877	4853	2875	0	6729195	1268151	47684	14153	169238	0	0	1071989	0	87684	709244	21233	3233828		1	0.00052204	0.000232919	0.000137985	0	0.322966	0.0608647	0.00228858	0.000679271	0.00812255	0	0	0.0514499	0	0.00420838	0.03404	0.00101907	0.155207
	75	24-1-1	M	29	UR6	MB	4	0	1	0		1915700	0	0	0	7786	13060	68450	0	0	0	935	7089	94603	126378	9514	14649	0	366193		1	0	0	0	0.00406431	0.00681735	0.0357311	0	0	0	0.000488072	0.00370048	0.049383	0.0659696	0.00496633	0.00764681	0	0.191154
	102	HC04-1-1	M	29	UL6	M	3	1	1	1		14953350	0	286340	3225	49814	110082	144919	0	9263	0	7274	33132	557987	13508	741254	5235	331109	2365049		1	0	0.0191489	0.000215671	0.00333129	0.00736169	0.00969141	0	0.00061946	0	0.000486446	0.00221569	0.0373152	0.000903343	0.0495711	0.000350089	0.0221428	0.158162
	105	HC05-1-1	M	33	UL6	M	3	0	0	1		17773468	0	0	2281	49354	1485682	231194	0	0	0	1222	248186	177781	162907	0	27494	0	2875836		1	0	0	0.000128337	0.00277684	0.0835899	0.0130078	0	0	0	6.87542e-05	0.0139638	0.0100026	0.00916574	0	0.00154691	0	0.161805
	108	HC06-1-1	F	25	UL6	M	2	0	0	0		16136169	0	123406	5837	486981	329763	173916	0	0	0	19650	32879	334833	0	28796	11571	1036701	1321958		1	0	0.00764779	0.000361734	0.0301795	0.0204363	0.010778	0	0	0	0.00121776	0.0020376	0.0207505	0	0.00178456	0.000717085	0.064247	0.0819251
	114	HC08-1-1	F	25	UL6	M	3	0	0	1		9653376	0	0	0	268398	125811	55324	0	148076	0	2251	33478	340085	151551	29082	6725	539052	959542		1	0	0	0	0.0278035	0.0130328	0.00573105	0	0.0153393	0	0.000233183	0.00346801	0.0352296	0.0156993	0.00301262	0.000696647	0.0558408	0.0993996
	117	HC09-1-1	F	24	UL6	M	3	0	0	0		3673062	0	0	599	17499	56058	24319	0	0	0	0	12325	591105	1800	16916	44107	0	1051940		1	0	0	0.000163079	0.00476415	0.0152619	0.00662091	0	0	0	0	0.00335551	0.16093	0.000490054	0.00460542	0.0120082	0	0.286393
	123	HC11-1-1	M	45	UL6	M	3	0	0	1		4326397	0	1224	1218	4284	71502	519840	0	0	0	0	2529	755985	74504	0	141716	0	1428886		1	0	0.000282914	0.000281528	0.0009902	0.0165269	0.120155	0	0	0	0	0.000584551	0.174738	0.0172208	0	0.0327561	0	0.330272
	159	35-1-1	F	41	LR6	MB	4	0	0	1		4631452	13226	4593	1912	14376	78584	407152	0	0	0	1197	10790	350951	166350	0	5041	17899	911668		1	0.00285569	0.000991698	0.000412829	0.00310399	0.0169675	0.0879102	0	0	0	0.00025845	0.00232972	0.0757756	0.0359175	0	0.00108843	0.00386466	0.196843
	169	39-2-1	M	48	LL6	B	6	1	1	2		2189002	0	990	3922	76121	12136	30912	1905	0	0	822	12255	48745	14137	9204	0	100214	227436		1	0	0.000452261	0.00179168	0.0347743	0.00554408	0.0141215	0.00087026	0	0	0.000375514	0.00559844	0.0222681	0.00645819	0.00420466	0	0.0457807	0.103899
	170	40-1-1	F	59	LL7	B	4	0	0	1		5319882	0	1119	1121	0	272599	1720372	0	0	0	0	9576	236818	316346	48643	104652	0	461772		1	0	0.000210343	0.000210719	0	0.0512416	0.323385	0	0	0	0	0.00180004	0.0445156	0.0594649	0.00914362	0.0196719	0	0.0868012
	185	45-1-1	F	66	UL5	MB	4	0	1	1		5111169	0	1655	780	4902	15739	8347	0	0	0	0	5204	209506	0	11238	601678	9500	968728		1	0	0.000323801	0.000152607	0.000959076	0.00307933	0.00163309	0	0	0	0	0.00101816	0.0409898	0	0.00219871	0.117718	0.00185867	0.189532
	191	48-1-1	F	24	UL7	MB	4	1	2	2		2637976	21582	3856	7095	65987	13656	13038	0	0	0	2218	2794	205471	779	104545	14872	14912	241067		1	0.00818127	0.00146173	0.00268956	0.0250143	0.0051767	0.00494243	0	0	0	0.000840796	0.00105915	0.0778896	0.000295302	0.0396308	0.00563766	0.00565282	0.0913833
	196	50-2-1	F	61	UL6	DB	6	1	1	2		6950931	0	20929	4458	7373	64981	42747	0	0	0	0	40835	1181426	41272	10773	92959	8524	1335401		1	0	0.00301096	0.000641353	0.00106072	0.00934853	0.00614982	0	0	0	0	0.00587475	0.169967	0.00593762	0.00154986	0.0133736	0.00122631	0.192118
	205	HCN03-1-1	M	23	RU6	-	3	0	0	1		30981525	0	0	4284	41110	594592	198213	0	48105	0	0	113078	1252020	158467	212546	2288962	89852	8826891		1	0	0	0.000138276	0.00132692	0.0191918	0.00639778	0	0.0015527	0	0	0.00364985	0.0404118	0.00511489	0.00686041	0.0738815	0.00290018	0.284908
	207	HCN05-1-1	M	24	RL6	D	4	0	0	1		5701158	0	0	1341	0	250893	66213	0	8659	245151	0	0	28514	57550	141393	7387	31117	265109		1	0	0	0.000235215	0	0.0440074	0.011614	0	0.00151881	0.0430002	0	0	0.00500144	0.0100944	0.0248008	0.0012957	0.00545801	0.0465009
	212	HCN10-1-1	M	23	RU6	M	4	0	0	0		8876457	0	0	995	36840	32503	12141	0	0	0	5397	58384	789315	233863	0	36420	119272	2690458		1	0	0	0.000112094	0.0041503	0.00366171	0.00136778	0	0	0	0.000608013	0.0065774	0.0889223	0.0263464	0	0.00410299	0.0134369	0.3031
	216	HCN14-1-1	M	23	RU1	MB	3	0	0	0		1924208	0	7901	515	52153	21695	45703	0	0	0	1923	2210	8075	2319	9918	3092	7708	156304		1	0	0.0041061	0.000267643	0.0271036	0.0112748	0.0237516	0	0	0	0.000999372	0.00114852	0.00419653	0.00120517	0.00515433	0.00160689	0.0040058	0.0812303
	218	HCN16-1-1	M	24	RU1	MB	3	0	0	1		3086413	0	0	0	0	57904	44225	0	0	0	605	0	563141	56757	170725	15992	16141	553473		1	0	0	0	0	0.0187609	0.0143289	0	0	0	0.00019602	0	0.182458	0.0183893	0.055315	0.00518142	0.0052297	0.179326
	219	HCN17-1-1	M	23	RU1	MB	2	0	0	0		5448026	8795	0	846	3474	25524	34805	0	0	0	5217	126658	48636	88674	0	17238	8175	1095080		1	0.00161435	0	0.000155286	0.000637662	0.004685	0.00638855	0	0	0	0.000957595	0.0232484	0.00892727	0.0162764	0	0.00316408	0.00150054	0.201005
	230	HCN28-1-1	M	23	RU1	MB	2	0	0	0		4300070	7555	0	790	14062	25872	20032	0	0	0	0	20919	711728	76420	56840	2751	0	1252820		1	0.00175695	0	0.000183718	0.00327018	0.00601665	0.00465853	0	0	0	0	0.0048648	0.165515	0.0177718	0.0132184	0.000639757	0	0.291349
	232	HCN30-1-1	M	23	RU1	MB	3	0	0	0		6306075	3751	1086	53738	0	651681	184370	0	18491	0	0	2071	26616	2115	42316	0	491875	128582		1	0.000594823	0.000172215	0.00852162	0	0.103342	0.0292369	0	0.00293225	0	0	0.000328413	0.00422069	0.000335391	0.00671035	0	0.0780002	0.0203902
	233	HCN31-1-1	M	23	RU1	MB	2	0	0	1		3629413	0	0	630	27336	56591	49149	0	0	0	0	3727	171819	6179	74434	8888	25024	343483		1	0	0	0.000173582	0.0075318	0.0155923	0.0135419	0	0	0	0	0.00102689	0.0473407	0.00170248	0.0205086	0.00244888	0.00689478	0.0946387
	238	HCN36-1-1	M	23	RU1	MB	3	1	0	2		5640501	6669	0	890	0	19376	13591	0	28031	0	0	0	175614	2482	477103	2945	21452	1580602		1	0.00118234	0	0.000157787	0	0.00343516	0.00240954	0	0.00496959	0	0	0	0.0311345	0.000440032	0.0845852	0.000522117	0.00380321	0.280224
	241	HCN39-1-1	F	23	RU1	MB	2	0	0	0		4379419	2467	0	650	304330	12356	39253	0	0	0	0	15855	90598	6981	0	96362	0	274760		1	0.000563317	0	0.000148422	0.069491	0.00282138	0.00896306	0	0	0	0	0.00362034	0.0206872	0.00159405	0	0.0220034	0	0.0627389
	243	HCN41-1-1	M	23	RU1	MB	2	0	0	1		5759607	8289	1083	921	16540	0	3044	0	0	0	0	2764	97988	4729	0	20168	0	1890429		1	0.00143916	0.000188034	0.000159907	0.00287172	0	0.000528508	0	0	0	0	0.000479894	0.017013	0.000821063	0	0.00350163	0	0.328222
	246	HCN44-1-1	M	24	RU1	MB	2	0	0	1		6604321	0	0	874	5571	49790	31272	0	5033	0	0	0	307087	229515	14084	18691	0	764738		1	0	0	0.000132338	0.000843539	0.007539	0.00473508	0	0.000762077	0	0	0	0.0464979	0.0347522	0.00213254	0.00283012	0	0.115794
	254	HCN52-1-1	F	23	RU1	MB	2	0	0	0		2824366	0	0	0	0	11168	5092	0	0	0	0	0	28761	12407	11059	6896	14854	903465		1	0	0	0	0	0.00395416	0.00180288	0	0	0	0	0	0.0101832	0.00439284	0.00391557	0.00244161	0.00525923	0.319882
	291	74-1-1	F	73	UR3	MB	4	1	1	2		7002293	0	0	0	71858	283806	55975	0	25680	39253	0	141792	65114	216298	648312	110048	1050842	828900		1	0	0	0	0.0102621	0.0405304	0.00799381	0	0.00366737	0.00560574	0	0.0202494	0.00929895	0.0308896	0.0925857	0.015716	0.150071	0.118376
	292	74-2-1	F	73	UR4	MB	6	1	2	2		9334193	0	0	0	13713	1459844	265343	0	31107	322398	0	105163	92832	90350	521803	31822	1560825	854557		1	0	0	0	0.00146911	0.156397	0.028427	0	0.00333259	0.0345395	0	0.0112664	0.00994537	0.00967947	0.0559023	0.00340919	0.167216	0.0915512
	303	85-1-1	M	69	UR1	MP	4	0	1	1		1998517	2695	2617	8767	5744	339070	59005	0	4232	9145	9921	0	8942	1005	55567	4497	95449	39606		1	0.0013485	0.00130947	0.00438675	0.00287413	0.169661	0.0295244	0	0.00211757	0.00457589	0.00496418	0	0.00447432	0.000502873	0.0278041	0.00225017	0.0477599	0.0198177
	307	87-1-1	M	68	LL7	DL	4	0	1	1		1054077	0	609	338	0	7050	12981	0	0	0	0	0	68414	24639	21161	13208	25986	152013		1	0	0.000577757	0.00032066	0	0.00668832	0.012315	0	0	0	0	0	0.0649042	0.023375	0.0200754	0.0125304	0.0246528	0.144214
[truncated: 18 more columns]

## Sheet: cluster 3
						MIN	2	0	0	0		1183275	0	2037	391	0	18072	9763	0	0	0	0	0	0	0	0	0	0	859		1	0	0.000273956	0.000139203	0	0.00189982	0.00182201	0	0	0	0	0	0	0	0	0	0	0.000301563
						MAX	12	1	2	2		3481530123	104634724	33626515	38743635	49730445	158257725	69776379	31554267	371792	26678620	1246947	844127	2579053	2345648	5888817	168028	8811057	15553497		1	0.299041	0.428772	0.278882	0.239732	0.508028	0.34848	0.0506202	0.00583771	0.145268	0.0156486	0.0268557	0.0891907	0.34548	0.0350512	0.0331548	0.202785	0.266825
						AVG	6.23148	0.712963	1.37963	1.23148		7.9248e+07	2.66895e+06	1.92674e+06	1.89832e+06	2.15289e+06	5.74375e+06	3.18827e+06	418096	8998.39	545599	30544.8	37246	136171	67494.7	85282.8	15739.9	330427	756475		1	0.0547351	0.0640369	0.035362	0.0471558	0.119505	0.0757451	0.00453076	0.00030293	0.0105434	0.000590675	0.00153546	0.00685707	0.0051694	0.00207843	0.00158926	0.011896	0.0305398
						S.E.	0.218798	0.0437331	0.055375	0.0552011		3.50836e+07	1.03191e+06	432553	530744	630571	2.03406e+06	980095	294202	3730.62	257604	14324.7	11654.3	37754	26858.4	55197.1	2843.95	120678	200409		0	0.00666544	0.00654308	0.00462682	0.0041811	0.0113687	0.00721321	0.000939115	7.44704e-05	0.00220838	0.000225936	0.000420607	0.00145407	0.00321059	0.000563476	0.000393168	0.00272348	0.00432451
						MEDIAN	6	1	1	1		13472289	337752	851514	230576	600534	1071686	835416	4963.5	0	0	0	0	19193	3284	0	4965	0	175635		1	0.025682	0.0417117	0.016662	0.0378123	0.0800731	0.0459919	0.000612668	0	0	0	0	0.00154846	0.000306134	0	0.000430229	0	0.0123744
						S.D.	2.26326	0.452379	0.572803	0.571004		3.62908e+08	1.06742e+07	4.47436e+06	5.49005e+06	6.52268e+06	2.10404e+07	1.01382e+07	3.04325e+06	38589.9	2.66468e+06	148176	120553	390531	277825	570963	29418	1.2483e+06	2.07305e+06		0	0.0689479	0.0676822	0.0478602	0.0432496	0.117599	0.0746141	0.00971428	0.000770328	0.0228437	0.0023371	0.00435079	0.015041	0.0332106	0.00582864	0.00406696	0.0281719	0.044733
								BOP (%)	-	0.712963
								GI	0	5
									1	57
									2	46
								plI	0	8
									1	67
									2	33
	N=	108										genome copy number /paper point																			genome (%)
	GCF No.	Sample ID	Gender	Age	Teeth	BDMLP	PD	BOP	GI	PlI		Total bacteria	Porphyromonas gingivalis	Tannerella forsythia	Treponema denticola	Campylobacter rectus	Fusobacterium nucleatum subsp. animalis	Fusobacterium nucleatum subsp. nucleatum	Prevotella intermedia	Prevotella nigrescens	Streptococcus constellatus	Aggregatibacter actinomycetemcomitans	Capnocytophaga gingivalis	Streptococcus gordonii	Streptococcus intermedius	Veillonella parvula	Actinomyces viscosus	Selenomonas noxia	streptococci		Total bacteria	Porphyromonas gingivalis	Tannerella forsythia	Treponema denticola	Campylobacter rectus	Fusobacterium nucleatum subsp. animalis	Fusobacterium nucleatum subsp. nucleatum	Prevotella intermedia	Prevotella nigrescens	Streptococcus constellatus	Aggregatibacter actinomycetemcomitans	Capnocytophaga gingivalis	Streptococcus gordonii	Streptococcus intermedius	Veillonella parvula	Actinomyces viscosus	Selenomonas noxia	streptococci
	3	2-1-1	F	66	UL6	MP	5	1	2	1		2419043	132917	16496	50206	44489	311861	83793	75766	0	42268	0	3848	80918	32499	0	18007	0	194708		1	0.0549461	0.00681923	0.0207545	0.0183912	0.128919	0.0346389	0.0313207	0	0.017473	0	0.00159071	0.0334504	0.0134347	0	0.00744385	0	0.0804897
	4	2-2-1	F	66	UR7	P	9	1	2	1		27238279	4809184	674323	4252534	2096641	6196117	2859552	293116	0	3956860	0	0	0	7042	0	7782	0	2372090		1	0.17656	0.0247564	0.156123	0.0769741	0.227478	0.104983	0.0107612	0	0.145268	0	0	0	0.000258533	0	0.000285701	0	0.0870866
	5	3-1-1	M	59	UR7	MP	4	1	2	2		13277577	0	1984825	898480	985598	1129798	606171	37642	0	0	0	37396	37229	0	0	8219	147836	145494		1	0	0.149487	0.067669	0.0742303	0.0850907	0.0456537	0.00283501	0	0	0	0.00281648	0.0028039	0	0	0.000619014	0.0111343	0.0109579
	6	3-2-1	M	59	UL7	MP	12	1	2	1		11802936	0	2463475	342633	1090256	417788	1759240	43321	0	56503	0	0	5159	0	0	15386	0	52565		1	0	0.208717	0.0290295	0.0923716	0.035397	0.149051	0.00367036	0	0.0047872	0	0	0.000437095	0	0	0.00130357	0	0.00445355
	7	4-1-1	F	40	LR3	MB	5	1	1	1		12337541	666684	346146	106806	1411774	540672	560167	4176	0	34955	11144	17348	86572	9738	0	0	0	143935		1	0.054037	0.0280563	0.00865699	0.114429	0.0438233	0.0454035	0.000338479	0	0.00283322	0.000903259	0.00140611	0.00701696	0.000789298	0	0	0	0.0116664
	8	4-2-1	F	40	LL2	DB	7	1	2	1		9417920	512173	233085	69573	590679	151075	375257	4869	0	0	830	0	17430	6799	0	0	0	30163		1	0.0543828	0.0247491	0.0073873	0.0627186	0.0160412	0.039845	0.000516993	0	0	8.81299e-05	0	0.00185073	0.000721922	0	0	0	0.00320272
	13	7-1-1	M	60	UR6	MP	4	0	1	1		1941257	44482	49390	16579	13709	67750	42478	0	0	10559	1982	41809	2102	0	0	10296	80134	47033		1	0.022914	0.0254423	0.00854034	0.00706192	0.0349001	0.0218817	0	0	0.00543926	0.00102099	0.0215371	0.0010828	0	0	0.00530378	0.0412794	0.0242281
	14	7-2-1	M	60	UL7	B	7	1	2	1		15233941	174383	650216	97827	1412428	729933	2913161	22790	0	0	0	0	0	0	0	0	0	4594		1	0.011447	0.0426821	0.00642165	0.0927159	0.0479149	0.191228	0.001496	0	0	0	0	0	0	0	0	0	0.000301563
	15	8-1-1	M	68	LL6	B	5	0	1	1		1183275	302536	19420	391	50059	508078	50295	0	0	0	0	0	0	0	0	0	0	859		1	0.255677	0.0164121	0.000330439	0.0423055	0.429383	0.0425049	0	0	0	0	0	0	0	0	0	0	0.000725951
	16	8-2-1	M	68	UR6	P	6	1	1	2		19051299	3655047	1428346	8784	726213	3232400	732607	0	0	0	0	30045	48458	0	50452	29044	116118	229806		1	0.191853	0.0749737	0.000461071	0.0381188	0.169668	0.0384544	0	0	0	0	0.00157706	0.00254355	0	0.00264822	0.00152452	0.00609502	0.0120625
	17	9-1-1	F	42	LL4	MB	5	1	2	1		13898035	0	786726	274323	190536	1854313	1831401	0	0	0	0	0	19517	28601	0	143156	0	57008		1	0	0.056607	0.0197383	0.0137096	0.133423	0.131774	0	0	0	0	0	0.0014043	0.00205792	0	0.0103004	0	0.00410187
	18	9-2-1	F	42	LR3	MB	9	1	2	1		24424930	0	2050224	295181	764448	5269737	2600574	0	0	0	0	0	0	0	0	0	0	14656		1	0	0.0839398	0.0120852	0.0312979	0.215752	0.106472	0	0	0	0	0	0	0	0	0	0	0.000600043
	20	10-2-1	M	29	UR2	MB	9	1	2	2		16475612	523326	1596660	226731	1530854	7107428	823595	111210	0	0	144887	0	0	0	0	21909	0	5854		1	0.0317637	0.0969105	0.0137616	0.0929164	0.431391	0.0499887	0.00674998	0	0	0.00879403	0	0	0	0	0.00132978	0	0.000355313
	21	11-1-1	F	46	UL5	MB	4	0	1	2		1944045	4934	2037	4363	12462	35600	10854	0	0	0	0	0	134645	3061	0	3223	0	374739		1	0.00253801	0.00104782	0.00224429	0.00641035	0.0183123	0.0055832	0	0	0	0	0	0.0692602	0.00157455	0	0.00165788	0	0.192763
	22	11-2-1	F	46	UR6	MB	11	1	2	2		1325938273	104634724	23019234	38743635	49730445	158257725	69776379	31554267	0	3569974	0	0	511329	2345648	0	0	8811057	10547238		1	0.0789137	0.0173607	0.0292198	0.0375059	0.119355	0.0526242	0.0237977	0	0.00269241	0	0	0.000385636	0.00176905	0	0	0.00664515	0.00795455
	23	12-1-1	F	23	UL1	DB	5	0	1	1		4476542	0	295810	1514	490363	121270	1070107	0	0	0	1053	1950	4447	0	0	5935	0	22244		1	0	0.06608	0.000338207	0.109541	0.0270901	0.239048	0	0	0	0.000235226	0.000435604	0.000993401	0	0	0.0013258	0	0.00496901
	24	12-2-1	F	23	UL6	MB	9	0	2	1		23414117	2802120	5802288	381613	1154700	2742924	897272	5599	0	0	366397	0	0	0	0	0	0	86651		1	0.119677	0.247812	0.0162984	0.0493164	0.117148	0.0383218	0.000239129	0	0	0.0156486	0	0	0	0	0	0	0.0037008
	26	13-2-1	M	28	UL2	MB	7	1	2	1		18486441	0	2288755	581400	1081636	1042474	2776032	37412	0	0	139752	0	16965	3834	0	16673	0	37924		1	0	0.123807	0.0314501	0.0585097	0.0563913	0.150166	0.00202375	0	0	0.0075597	0	0.0009177	0.000207395	0	0.000901904	0	0.00205145
	28	14-2-1	F	47	LL6	MB	7	1	2	2		524553451	20496453	4895774	27556226	16399968	21961660	3864522	464680	371792	3269566	0	443053	1539659	261090	5888817	168028	7194396	8055285		1	0.0390741	0.00933322	0.0525327	0.0312646	0.0418673	0.00736726	0.000885858	0.000708778	0.00623305	0	0.000844629	0.00293518	0.000497738	0.0112263	0.000320326	0.0137153	0.0153565
	29	15-1-1	M	39	UR5	DB	5	0	1	1		9374041	1177599	1560494	275871	223769	895702	118152	0	0	0	0	0	62048	0	13783	0	0	200003		1	0.125623	0.16647	0.0294293	0.0238711	0.0955513	0.0126042	0	0	0	0	0	0.00661913	0	0.00147034	0	0	0.0213358
	30	15-2-1	M	39	LL7	DB	8	0	1	1		19983643	1403957	1024613	2270225	171270	2355348	306695	0	13310	0	0	0	5641	0	44014	0	0	118456		1	0.0702553	0.0512726	0.113604	0.00857051	0.117864	0.0153473	0	0.000666045	0	0	0	0.000282281	0	0.0022025	0	0	0.00592765
	31	16-1-1	F	65	UR1	MB	4	1	1	0		5146630	559663	143868	70701	808805	497040	847237	4080	0	0	0	0	3223	63803	0	4123	0	68140		1	0.108744	0.0279538	0.0137373	0.157152	0.0965758	0.16462	0.000792752	0	0	0	0	0.000626235	0.012397	0	0.000801107	0	0.0132397
	32	16-2-1	F	65	UL2	DB	8	1	2	1		10665524	1258922	263107	234422	1378266	988160	161519	6763	0	13518	0	0	0	45166	0	0	0	39742		1	0.118037	0.0246689	0.0219794	0.129226	0.0926499	0.015144	0.000634099	0	0.00126745	0	0	0	0.00423477	0	0	0	0.00372621
	35	18-1-1	M	63	UR4	DB	4	0	1	2		5365519	352688	198756	17857	291944	439022	153829	0	0	0	0	4572	61734	19462	0	25946	115796	593171		1	0.0657323	0.0370432	0.0033281	0.0544111	0.0818228	0.0286699	0	0	0	0	0.000852108	0.0115057	0.00362724	0	0.00483569	0.0215815	0.110552
	36	18-2-1	M	63	UL4	DB	8	1	2	2		13821450	858295	398771	467554	513242	341046	455573	46502	12799	0	0	11732	21024	0	0	13117	445117	170038		1	0.0620988	0.0288516	0.0338281	0.0371337	0.0246751	0.0329613	0.00336448	0.000926024	0	0	0.000848826	0.00152111	0	0	0.000949032	0.0322048	0.0123025
	37	19-1-1	F	45	UL3	MB	4	0	1	1		6878978	491739	249942	627253	593040	1142663	167517	0	0	0	0	0	32530	0	0	2299	0	189313		1	0.0714843	0.0363342	0.091184	0.0862105	0.166109	0.024352	0	0	0	0	0	0.0047289	0	0	0.000334207	0	0.0275205
	38	19-2-1	F	45	UR3	MB	8	1	2	2		4610790	171977	130719	126022	76496	405694	1109101	3821	0	0	592	0	2626	0	0	0	0	14070		1	0.0372988	0.0283507	0.027332	0.0165906	0.087988	0.240545	0.000828708	0	0	0.000128394	0	0.000569534	0	0	0	0	0.00305154
	40	20-2-1	F	38	UR4	MB	7	1	2	2		70630723	6704503	2369176	4015641	4429566	4054457	1428371	58459	30347	176995	0	0	384770	22058	0	90308	0	1205492		1	0.0949233	0.0335431	0.056854	0.0627144	0.0574036	0.0202231	0.000827671	0.000429657	0.00250592	0	0	0.00544763	0.0003123	0	0.00127859	0	0.0170675
	70	21-2-1	M	59	UR6	MP	8	1	1	1		13612348	550716	1722666	579835	146350	6558557	1026210	0	0	0	0	0	68904	0	0	0	0	373956		1	0.0404571	0.126552	0.0425963	0.0107513	0.481809	0.0753882	0	0	0	0	0	0.00506187	0	0	0	0	0.0274718
	72	22-2-1	M	59	LL5	MB	6	1	2	1		26678125	0	2757843	970162	1454846	4780180	2029112	141207	0	368276	0	0	0	0	0	9090	67865	193681		1	0	0.103375	0.0363654	0.0545333	0.17918	0.076059	0.00529299	0	0.0138044	0	0	0	0	0	0.000340729	0.00254384	0.00725992
	73	23-1-1	M	68	UR6	MP	3	0	1	2		14323030	0	11189	2563	18549	620881	805070	0	28900	525284	0	338324	155661	53608	0	0	30899	1711912		1	0	0.000781189	0.000178943	0.00129505	0.0433484	0.0562081	0	0.00201773	0.0366741	0	0.023621	0.0108679	0.00374278	0	0	0.00215729	0.119522
	74	23-2-1	M	68	UR7	DB	8	1	1	2		12763205	66012	152246	1863	31267	1955229	1462766	0	0	651509	0	342765	60350	51783	0	3315	38191	1026347		1	0.00517206	0.0119285	0.000145966	0.00244978	0.153193	0.114608	0	0	0.0510459	0	0.0268557	0.00472844	0.00405721	0	0.000259731	0.00299227	0.0804145
	76	24-2-1	M	29	UR7	MB	9	1	1	1		508352685	997996	20545658	1676132	1041285	14020060	3835707	166219	0	26678620	0	641530	2214491	0	0	0	0	15553497		1	0.0019632	0.0404161	0.00329718	0.00204835	0.0275794	0.00754537	0.000326976	0	0.0524805	0	0.00126198	0.00435621	0	0	0	0	0.0305959
	77	25-1-1	M	57	LL3	MB	4	0	1	0		8616372	27227	22163	24998	74542	2232024	374653	0	0	458432	0	27680	111866	0	0	40513	0	1594573		1	0.00315991	0.0025722	0.00290122	0.0086512	0.259045	0.0434815	0	0	0.0532048	0	0.00321249	0.012983	0	0	0.00470186	0	0.185063
	78	25-2-1	M	57	LL6	B	7	0	1	2		52630189	1071277	806287	125365	142560	2862191	582420	0	0	5939096	0	0	131994	0	0	11352	0	5696352		1	0.0203548	0.0153199	0.002382	0.00270871	0.0543831	0.0110663	0	0	0.112846	0	0	0.00250795	0	0	0.000215694	0	0.108234
	81	27-1-1	M	59	UR3	DB	4	1	1	1		2512629	2403	191931	1186	1862	629263	119178	0	0	14192	0	1329	0	28150	0	0	0	39796		1	0.000956369	0.0763865	0.000472016	0.000741056	0.25044	0.0474316	0	0	0.00564827	0	0.000528928	0	0.0112034	0	0	0	0.0158384
	82	27-2-1	M	59	UL4	DB	11	1	1	2		29876964	1678507	2882011	3246017	515730	4855543	5906404	17951	0	297401	0	0	0	0	0	0	0	152719		1	0.0561806	0.0964626	0.108646	0.0172618	0.162518	0.197691	0.000600831	0	0.00995419	0	0	0	0	0	0	0	0.0051116
	83	28-1-1	M	46	UR5	MB	4	1	2	2		11322242	512301	1738438	954385	450792	818630	1569644	6192	0	174850	1908	7477	31189	49496	0	10671	0	250374		1	0.0452473	0.153542	0.0842929	0.0398147	0.0723028	0.138634	0.000546888	0	0.0154431	0.000168518	0.000660382	0.00275467	0.00437157	0	0.000942481	0	0.0221135
	84	28-2-1	M	46	UR3	DB	6	1	2	1		9705832	610305	855113	968951	498468	328156	185505	16187	0	73114	0	4365	24527	0	0	6865	0	86875		1	0.0628802	0.088103	0.0998318	0.0513576	0.0338102	0.0191127	0.00166776	0	0.007533	0	0.00044973	0.00252704	0	0	0.000707307	0	0.0089508
	86	29-2-1	F	42	LR2	DB	6	1	2	1		590642747	29763711	33626515	25831943	27006942	152687930	69752057	0	0	1397172	0	0	132824	0	0	0	0	981350		1	0.0503921	0.0569321	0.0437353	0.0457247	0.258511	0.118095	0	0	0.00236551	0	0	0.00022488	0	0	0	0	0.0016615
	87	30-1-1	F	52	UR4	MB	4	1	1	1		4648767	120311	205149	98750	104137	245653	596411	16313	0	0	0	0	148834	5364	0	36476	0	269981		1	0.0258802	0.0441298	0.0212422	0.022401	0.0528426	0.128294	0.0035091	0	0	0	0	0.0320158	0.00115385	0	0.00784638	0	0.0580758
	88	30-2-1	F	52	UR2	DB	6	1	2	2		10079106	224884	391363	271202	405699	908592	1120573	510206	0	0	1104	0	8683	3304	0	6630	334813	56787		1	0.0223119	0.0388291	0.0269073	0.0402515	0.0901461	0.111178	0.0506202	0	0	0.000109534	0	0.000861485	0.000327807	0	0.000657796	0.0332185	0.00563413
	89	31-1-1	M	40	LR3	MB	4	1	2	2		10639236	18297	153605	38516	713684	101378	483325	13283	5389	0	0	80678	131066	37647	19562	0	687385	229716		1	0.00171977	0.0144376	0.00362018	0.0670804	0.00952869	0.0454285	0.00124849	0.000506521	0	0	0.00758306	0.0123191	0.00353851	0.00183867	0	0.0646085	0.0215914
	90	31-2-1	M	40	LR1	DB	6	1	2	2		14910753	0	934304	145529	1509890	416350	2192421	25810	0	0	0	41922	55505	62859	0	0	296140	195029		1	0	0.0626597	0.00976	0.101262	0.0279228	0.147036	0.00173097	0	0	0	0.00281153	0.00372248	0.00421568	0	0	0.0198608	0.0130798
	91	32-1-1	M	31	UR4	MB	4	0	2	2		5358362	6004	7124	5429	22261	26604	9763	4810	0	122572	0	2133	12227	16676	65974	13552	60204	212526		1	0.00112049	0.00132951	0.00101318	0.00415444	0.00496495	0.00182201	0.000897662	0	0.0228749	0	0.000398069	0.00228185	0.00311215	0.0123123	0.00252913	0.0112355	0.0396625
	92	32-2-1	M	31	UL4	MB	9	1	2	2		210389195	19723710	8333043	16712214	13917509	23650966	8126622	233835	0	1912536	0	0	331533	162345	395695	121171	0	2618560		1	0.0937487	0.0396078	0.0794348	0.0661513	0.112415	0.0386266	0.00111144	0	0.00909047	0	0	0.00157581	0.000771641	0.00188078	0.000575937	0	0.0124463
	93	HC01-1-1	M	49	UL6	M	3	0	0	1		6658743	32361	27048	38547	214614	545215	336920	13110	0	0	0	64818	74165	2102	11152	4352	198007	165447		1	0.00485993	0.00406203	0.00578893	0.0322304	0.0818796	0.0505981	0.00196884	0	0	0	0.00973427	0.011138	0.000315675	0.00167479	0.000653577	0.0297364	0.0248466
	96	HC02-1-1	M	30	UL6	M	3	0	0	0		3271644	37566	15118	2976	195213	53991	124009	3561	0	0	0	35627	13825	5459	0	2685	23186	278200		1	0.0114823	0.00462092	0.000909634	0.0596682	0.0165027	0.0379042	0.00108844	0	0	0	0.0108896	0.0042257	0.00166858	0	0.000820688	0.00708696	0.0850337
	153	33-1-1	F	23	UR7	P	4	0	1	1		27621456	721840	2343407	3845	2480165	2518294	1601665	0	0	0	3231	28291	61490	0	40410	11980	21419	348710		1	0.0261333	0.0848401	0.000139203	0.0897912	0.0911717	0.0579863	0	0	0	0.000116974	0.00102424	0.00222617	0	0.00146299	0.000433721	0.000775448	0.0126246
	154	33-2-1	F	23	UL6	P	9	1	1	2		9512470	17368	2606	4132	4348	18072	37637	0	0	0	0	0	14426	3264	0	0	0	116054		1	0.00182581	0.000273956	0.000434377	0.000457084	0.00189982	0.0039566	0	0	0	0	0	0.00151654	0.000343129	0	0	0	0.0122002
	158	34-3-1	F	26	LL6	MB	10	1	1	1		16446053	972879	725124	632300	608027	2853898	298235	15427	0	0	10060	18701	98594	9868	0	27241	25817	102024		1	0.0591558	0.0440911	0.0384469	0.036971	0.173531	0.0181341	0.000938037	0	0	0.000611697	0.00113711	0.00599499	0.000600022	0	0.00165639	0.0015698	0.00620356
	160	35-2-1	F	41	LR7	DB	11	1	1	1		7649783	1540187	1414425	893809	437093	148116	266549	16589	0	0	0	0	0	0	0	0	0	8806		1	0.201337	0.184897	0.116841	0.057138	0.0193621	0.034844	0.00216856	0	0	0	0	0	0	0	0	0	0.00115114
	162	36-2-1	F	32	UL6	MB	7	1	1	1		59175991	197248	1173662	2037790	1759021	11510218	13818533	16168	26519	206238	0	0	0	0	0	61873	0	116042		1	0.00333324	0.0198334	0.0344361	0.0297252	0.194508	0.233516	0.000273219	0.000448138	0.00348516	0	0	0	0	0	0.00104558	0	0.00196096
	164	37-1-1	F	44	LL7	MB	4	1	1	1		2916280	8893	5681	11207	27040	213962	93136	0	0	5964	0	5060	260105	1051	102219	41107	143353	348030		1	0.00304943	0.00194803	0.00384291	0.00927209	0.0733681	0.0319366	0	0	0.00204507	0	0.00173509	0.0891907	0.000360391	0.0350512	0.0140957	0.0491561	0.11934
	165	37-2-1	F	44	LR7	MB	6	1	1	1		6601162	491112	603396	200145	698475	252747	94042	0	0	13300	0	7080	82655	0	0	5603	0	733913		1	0.0743978	0.0914075	0.0303197	0.105811	0.0382883	0.0142463	0	0	0.0020148	0	0.00107254	0.0125213	0	0	0.00084879	0	0.111179
	166	38-1-1	F	38	UL6	DB	5	1	1	1		14671286	1155365	3346524	17033	1327679	1113898	3531375	0	0	0	0	0	6498	77186	0	0	0	87678		1	0.0787501	0.2281	0.00116098	0.0904951	0.0759237	0.2407	0	0	0	0	0	0.000442906	0.00526102	0	0	0	0.00597616
	167	38-2-1	F	38	UR6	DB	9	1	1	1		18860410	689704	1226008	12638	745684	1196384	1476691	0	36825	908630	0	0	8526	0	0	9670	0	548615		1	0.0365689	0.0650043	0.000670081	0.039537	0.0634336	0.0782958	0	0.0019525	0.0481766	0	0	0.000452058	0	0	0.000512714	0	0.0290882
	168	39-1-1	M	48	LR6	B	4	1	2	2		16302999	3525997	2170048	1181606	3170284	1450585	236128	0	0	0	0	0	0	0	0	0	0	50105		1	0.216279	0.133107	0.0724778	0.19446	0.0889766	0.0144837	0	0	0	0	0	0	0	0	0	0	0.00307336
	171	40-2-1	F	59	LL6	B	7	1	1	1		21786433	293863	811054	554846	2722460	1165909	4295068	0	9787	0	0	0	14352	5693	0	37164	0	33412		1	0.0134883	0.0372275	0.0254675	0.124961	0.0535154	0.197144	0	0.000449225	0	0	0	0.000658759	0.000261309	0	0.00170583	0	0.00153361
	178	41-2-1	F	43	UR5	MB	9	1	1	0		6045097	36155	464919	563829	15047	220802	267113	0	0	12483	0	0	4833	8324	0	17464	9788	35979		1	0.00598088	0.0769084	0.0932705	0.00248912	0.0365258	0.0441867	0	0	0.00206498	0	0	0.000799491	0.00137698	0	0.00288895	0.00161916	0.00595177
	179	42-1-1	M	48	LR5	DB	4	0	1	1		12955793	18071	2947353	23841	101956	2938011	1070546	0	0	439802	0	0	4887	16307	0	0	89045	275958		1	0.00139482	0.227493	0.00184018	0.00786953	0.226772	0.0826307	0	0	0.0339464	0	0	0.000377206	0.00125866	0	0	0.00687299	0.0213
	180	42-2-1	M	48	LR6	DB	7	1	1	2		15679732	37479	2569616	8126	96592	5821197	1957863	0	0	676261	0	4848	12014	73449	0	0	0	508095		1	0.00239028	0.163881	0.000518249	0.00616031	0.371256	0.124866	0	0	0.0431296	0	0.000309189	0.000766212	0.00468433	0	0	0	0.0324046
	181	43-1-1	M	62	UL1	MB	4	1	1	2		3728370	80347	1598620	325057	5568	18610	104811	0	0	0	0	0	0	10589	0	0	79956	12209		1	0.0215502	0.428772	0.0871847	0.00149341	0.00499146	0.0281117	0	0	0	0	0	0	0.00284012	0	0	0.0214453	0.00327462
	182	43-2-1	M	62	UR4	MB	7	1	1	1		2245316	41618	287392	301391	25410	66075	139634	0	0	0	0	0	2297	4797	0	3691	0	13704		1	0.0185355	0.127996	0.134231	0.0113169	0.0294279	0.062189	0	0	0	0	0	0.00102302	0.00213645	0	0.00164387	0	0.00610337
	183	44-1-1	F	34	UL1	DB	4	0	1	0		3417031	51126	73230	11232	28632	988670	158311	0	0	0	0	0	103785	1025	24153	12072	388969	127257		1	0.0149621	0.0214309	0.00328706	0.0083792	0.289336	0.04633	0	0	0	0	0	0.0303729	0.000299968	0.00706842	0.00353289	0.113832	0.037242
	184	44-2-1	F	34	UL3	MB	6	1	2	0		22478997	290690	1491137	72139	131458	3725301	1373998	0	0	0	0	0	69904	34211	122504	11918	1285824	131594		1	0.0129316	0.0663347	0.00320917	0.00584804	0.165724	0.0611236	0	0	0	0	0	0.00310975	0.00152191	0.00544971	0.000530184	0.0572011	0.00585409
	186	45-2-1	F	66	UL3	MB	6	1	2	1		4002602	31541	656222	68147	0	738002	116664	8100	0	373846	0	3349	14479	0	0	5578	23799	193763		1	0.00788012	0.163949	0.0170257	0	0.184381	0.029147	0.00202368	0	0.0934007	0	0.000836706	0.0036174	0	0	0.00139359	0.00594588	0.0484093
	187	46-1-1	M	47	UR4	MB	4	0	1	1		2387950	2967	2411	958	2307	127171	53730	0	0	0	0	0	86806	13494	22838	79172	81456	136678		1	0.00124249	0.00100965	0.000401181	0.000966101	0.0532553	0.0225005	0	0	0	0	0	0.0363517	0.00565087	0.00956385	0.0331548	0.0341113	0.0572365
	188	46-2-1	M	47	UL3	DB	7	1	1	1		10720477	182094	2474365	162819	172416	2416367	1515462	0	6951	0	0	0	8363	2505	0	10364	283577	9808		1	0.0169856	0.230807	0.0151877	0.0160829	0.225397	0.141361	0	0.000648385	0	0	0	0.000780096	0.000233665	0	0.000966748	0.0264519	0.000914885
	189	47-1-1	F	36	UR5	MB	5	1	1	1		8071760	6413	1441464	173938	951941	96079	106779	0	0	0	0	5156	41379	12783	0	0	0	149932		1	0.000794498	0.178581	0.021549	0.117935	0.0119031	0.0132287	0	0	0	0	0.00063877	0.00512639	0.00158367	0	0	0	0.0185749
	190	47-2-1	F	36	UR2	DB	7	1	1	1		24998031	0	2864880	587526	3093870	575478	3525378	40444	0	0	0	0	10948	0	0	35993	0	18915		1	0	0.114604	0.0235029	0.123765	0.0230209	0.141026	0.00161789	0	0	0	0	0.000437954	0	0	0.00143983	0	0.00075666
	192	48-2-1	F	24	LR2	DB	6	1	2	2		93462369	8199321	2937484	8560919	2730621	4891383	2313722	279920	0	0	0	0	282848	193017	539136	0	4939389	1021470		1	0.0877286	0.0314296	0.0915975	0.0292163	0.0523353	0.0247557	0.002995	0	0	0	0	0.00302633	0.00206518	0.00576848	0	0.052849	0.0109292
	193	49-1-1	F	53	UL3	MB	4	0	1	2		14055800	238856	1435716	125320	121407	1100898	1120880	418876	14652	726671	0	3746	29096	7182	130110	9323	42348	616510		1	0.0169934	0.102144	0.00891589	0.0086375	0.0783234	0.079745	0.0298009	0.00104242	0.051699	0	0.000266509	0.00207004	0.000510963	0.00925668	0.000663285	0.00301285	0.0438616
	194	49-2-1	F	53	LL6	B	11	1	2	2		121225259	5566495	1681814	6471411	3166779	10110902	2306970	4049698	0	411900	0	0	0	102231	0	0	82787	320838		1	0.0459186	0.0138735	0.0533834	0.0261231	0.0834059	0.0190304	0.0334064	0	0.00339781	0	0	0	0.000843314	0	0	0.000682919	0.00264663
	197	51-1-1	F	35	UR3	MB	5	1	2	2		4391749	4959	9338	1532	7515	247223	51163	0	3252	13330	0	3889	0	146056	0	0	574356	106421		1	0.00112916	0.00212626	0.000348836	0.00171116	0.0562926	0.0116498	0	0.000740479	0.00303524	0	0.000885524	0	0.0332569	0	0	0.130781	0.024232
	198	51-2-1	F	35	UR2	MB	9	1	2	2		15443334	3612624	847914	538935	939691	871133	1336266	104246	7471	0	0	0	3738	2904	0	52696	136802	13289		1	0.233928	0.0549049	0.0348976	0.0608477	0.0564084	0.086527	0.00675023	0.000483769	0	0	0	0.000242046	0.000188042	0	0.00341222	0.00885832	0.000860501
	237	HCN35-1-1	M	23	RU1	MB	3	0	0	0		3407160	2486	9188	18347	1810	154997	97714	0	5459	0	0	0	13077	6770	19001	1346	57102	415513		1	0.00072964	0.00269667	0.00538484	0.000531234	0.0454916	0.028679	0	0.00160221	0	0	0	0.00383809	0.00198699	0.00557679	0.00039505	0.0167594	0.121953
	244	HCN42-1-1	M	29	RU6	M	4	0	0	1		16769655	5014816	504509	301765	120192	3277828	639375	69470	0	0	0	4656	231033	30465	22032	7252	44747	1064816		1	0.299041	0.0300846	0.0179947	0.00716723	0.195462	0.0381269	0.0041426	0	0	0	0.000277644	0.0137768	0.00181667	0.0013138	0.000432448	0.00266833	0.0634966
	261	55-1-1	F	35	RL5	MB	5	0	2	1		5010442	46218	61165	10711	40820	213865	586512	1750	7356	13825	0	0	19217	68407	0	72094	0	318323		1	0.00922434	0.0122075	0.00213774	0.00814699	0.0426839	0.117058	0.000349271	0.00146813	0.00275924	0	0	0.00383539	0.0136529	0	0.0143888	0	0.0635319
	262	55-2-1	F	35	LU5	MB	6	1	2	1		28580438	3939039	2282076	371140	1715232	7054759	7781844	29752	21332	37534	0	0	0	32295	0	0	50615	59499		1	0.137823	0.0798475	0.0129858	0.0600142	0.246839	0.272279	0.00104099	0.000746385	0.00131328	0	0	0	0.00112997	0	0	0.00177097	0.00208181
	265	57-1-1	F	73	RL4	DL	4	1	2	1		12248861	3398843	1007555	641812	944495	1116213	895364	111654	9336	0	1254	95735	35904	11852	0	8849	602434	277730		1	0.277482	0.082257	0.0523977	0.0771088	0.0911279	0.0730977	0.00911546	0.000762193	0	0.000102377	0.00781583	0.00293121	0.0009676	0	0.000722435	0.0491829	0.0226739
	266	57-2-1	F	73	RL7	DL	6	0	1	1		21653704	3628806	2541422	1248332	2778969	1584557	1216022	267436	126408	77411	0	22104	187949	35572	330230	9268	1105153	271509		1	0.167584	0.117367	0.0576498	0.128337	0.0731772	0.0561577	0.0123506	0.00583771	0.00357495	0	0.0010208	0.00867976	0.00164277	0.0152505	0.00042801	0.0510376	0.0125387
	268	58-2-1	F	68	LU7	MP	6	1	2	1		22384378	0	775366	164978	1050080	3402522	648078	764654	87079	925215	0	135226	83144	495992	0	22382	4539224	749360		1	0	0.0346387	0.00737023	0.0469113	0.152004	0.0289522	0.0341602	0.00389017	0.0413331	0	0.00604109	0.00371438	0.022158	0	0.000999894	0.202785	0.0334769
	270	59-2-1	F	63	RU7	DP	9	1	2	2		10351255	0	421723	1828135	1150545	247993	311090	0	0	127147	0	8886	19169	0	0	32762	374299	340878		1	0	0.0407412	0.17661	0.11115	0.0239578	0.0300534	0	0	0.0122832	0	0.000858447	0.00185185	0	0	0.00316503	0.0361598	0.0329311
	271	60-1-1	M	53	RU1	B	4	1	2	2		24507763	3499395	1084973	4905387	1063013	3309905	1618597	0	14165	0	0	0	14779	0	0	0	162219	26392		1	0.142787	0.0442706	0.200156	0.0433745	0.135055	0.0660443	0	0.00057798	0	0	0	0.000603033	0	0	0	0.00661909	0.00107688
	272	60-2-1	M	53	RU1	BO	8	1	2	2		24805044	2784382	1225449	6917672	867221	4457078	3513927	0	14670	0	0	16677	36676	0	0	0	28887	109756		1	0.112251	0.0494032	0.278882	0.0349615	0.179684	0.141662	0	0.000591412	0	0	0.000672323	0.00147857	0	0	0	0.00116456	0.00442475
	281	72-1-1	F	51	UL1	DB	2	0	0	0		13332230	442086	1117724	189320	910601	852134	467866	0	0	0	0	0	42802	0	0	0	41915	100095		1	0.0331592	0.0838362	0.0142002	0.0683007	0.0639153	0.0350929	0	0	0	0	0	0.00321042	0	0	0	0.00314389	0.00750775
	282	72-2-1	F	51	UL6	DP	6	1	2	1		22466927	1865101	1551124	37112	1849868	747245	206963	381759	0	374651	3563	223937	24836	32183	0	0	489023	344457		1	0.0830154	0.0690403	0.00165185	0.0823374	0.0332598	0.0092119	0.016992	0	0.0166757	0.000158589	0.00996741	0.00110545	0.00143246	0	0	0.0217664	0.0153317
	286	73-2-1	F	51	UR4	MB	7	1	1	1		1984518	25421	3357	7565	46940	186359	77277	13981	0	55518	0	0	6414	685611	0	25239	6610	529519		1	0.0128097	0.00169159	0.00381201	0.0236531	0.0939064	0.0389399	0.00704504	0	0.0279756	0	0	0.00323202	0.34548	0	0.0127179	0.00333078	0.266825
	295	77-1-1	M	34	UR1	MB	4	0	1	1		6773471	0	118237	30252	336191	120450	37698	5058	4734	28632	19246	26532	299501	67589	193352	0	144407	485667		1	0	0.0174559	0.00446625	0.0496335	0.0177826	0.00556554	0.000746737	0.000698903	0.00422708	0.00284138	0.00391705	0.0442168	0.00997849	0.0285455	0	0.0213195	0.0717013
	296	77-2-1	M	34	LL4	MB	2	0	1	1		4915885	0	300097	27355	220520	57585	31715	3070	0	29881	0	3799	304058	24566	45323	2633	0	461893		1	0	0.0610464	0.00556461	0.0448587	0.0117141	0.00645153	0.000624506	0	0.00607846	0	0.000772801	0.0618521	0.00499727	0.0092197	0.000535611	0	0.0939593
	297	77-3-1	M	34	UR3	MB	6	1	1	1		12796212	0	604819	64521	647293	542652	124454	0	14992	357912	0	0	2788	0	0	0	0	181232		1	0	0.0472655	0.0050422	0.0505847	0.0424072	0.00972585	0	0.0011716	0.0279702	0	0	0.000217877	0	0	0	0	0.0141629
	298	77-4-1	M	34	LL6	MB	9	1	1	1		3481530123	0	13267201	7495926	35276203	19090414	6917943	0	0	0	730139	844127	1759194	1543159	0	0	0	5203458		1	0	0.00381074	0.00215306	0.0101324	0.00548334	0.00198704	0	0	0	0.000209718	0.000242459	0.000505293	0.000443242	0	0	0	0.00149459
	299	84-1-1	M	36	UL5	B	3	0	1	1		9002367	606354	357376	3009	299016	2612477	373760	156930	0	165083	0	0	0	0	0	0	0	95242		1	0.067355	0.039698	0.000334245	0.0332153	0.290199	0.041518	0.0174321	0	0.0183377	0	0	0	0	0	0	0	0.0105797
	300	84-2-1	M	36	UL3	DB	9	1	1	1		6567336	172713	45125	1253	173968	3292591	360566	45904	0	105758	0	0	1846	0	0	3308	0	64132		1	0.0262988	0.00687113	0.000190793	0.0264899	0.501359	0.0549029	0.00698974	0	0.0161036	0	0	0.000281088	0	0	0.000503705	0	0.0097653
	301	84-3-1	M	36	UR1	MB	8	1	1	1		19766146	1513241	972419	10417	312925	8546008	1100010	49705	10501	674637	0	0	16246	29316	0	0	0	551327		1	0.0765572	0.0491962	0.000527012	0.0158314	0.432356	0.0556512	0.00251465	0.000531262	0.0341309	0	0	0.00082191	0.00148314	0	0	0	0.0278925
	302	84-4-1	M	36	UR3	MB	7	1	1	1		25113113	4171513	1788501	4944	878421	10221700	1289405	772229	21889	45169	0	0	9508	102880	0	10720	38104	244435		1	0.166109	0.0712178	0.000196869	0.0349786	0.407026	0.0513439	0.03075	0.000871616	0.00179862	0	0	0.000378607	0.00409666	0	0.000426869	0.00151729	0.00973336
	304	85-2-1	M	69	UL1	MP	7	1	1	1		115613317	2569969	2223898	9646456	4001623	12834834	40288957	0	0	130779	1246947	0	0	30042	0	54874	0	59453		1	0.022229	0.0192357	0.0834372	0.0346121	0.111015	0.34848	0	0	0.00113118	0.0107855	0	0	0.000259849	0	0.000474634	0	0.00051424
	305	86-1-1	F	40	UR3	MB	5	1	1	1		5030579	322817	90514	56736	197425	307415	1365790	13422	0	86979	0	0	10597	0	55628	0	0	91997		1	0.0641709	0.0179928	0.0112782	0.039245	0.0611093	0.271498	0.00266808	0	0.0172901	0	0	0.00210652	0	0.011058	0	0	0.0182876
	306	86-2-1	F	40	LL6	MB	9	1	1	1		159302069	7008237	715530	1872876	1847039	7115412	9008871	935591	0	977279	124244	180350	292416	0	0	0	239132	880047		1	0.0439934	0.00449166	0.0117568	0.0115946	0.0446662	0.0565521	0.00587306	0	0.00613475	0.000779927	0.00113213	0.00183561	0	0	0	0.00150112	0.00552439
	308	87-2-1	M	68	LR7	DL	7	1	2	1		12684499	2082337	127677	281515	303718	451031	1292806	184592	7768	0	0	0	318141	0	332146	11009	338518	610305		1	0.164164	0.0100656	0.0221936	0.023944	0.0355577	0.10192	0.0145526	0.000612401	0	0	0	0.0250811	0	0.0261852	0.00086791	0.0266875	0.0481142
	310	88-1-1	F	67	UL5	MB	4	0	1	1		40226332	2466887	1215973	2939924	2954091	2346913	11474645	1906013	20885	1023385	438614	186258	2579053	36907	742014	105142	478430	4121772		1	0.0613252	0.0302283	0.0730846	0.0734367	0.0583427	0.285252	0.0473822	0.000519187	0.0254407	0.0109037	0.00463025	0.0641136	0.000917484	0.018446	0.00261376	0.0118935	0.102465
	311	88-2-1	F	67	UR5	MB	6	0	1	1		20017369	4429947	894929	1311884	4798810	740483	5694074	0	0	0	17892	0	297483	0	0	18230	0	883462		1	0.221305	0.0447076	0.0655373	0.239732	0.036992	0.284457	0	0	0	0.000893824	0	0.0148612	0	0	0.000910709	0	0.0441348
	317	89-4-1	F	24	UL1	MB	12	1	2	2		10716913	1681061	189827	238135	253449	47638	338597	197400	0	0	5097	0	0	2288	0	0	15019	25596		1	0.156861	0.0177128	0.0222205	0.0236494	0.00444512	0.0315946	0.0184195	0	0	0.000475603	0	0	0.000213494	0	0	0.00140143	0.00238837
	318	90-1-1	F	20	LR3	MB	5	1	2	1		19887987	492043	1456576	2919646	1191546	1984711	866110	48253	11371	0	9081	0	44673	0	0	5629	0	43336		1	0.0247407	0.073239	0.146805	0.0599129	0.0997945	0.0435494	0.00242624	0.000571752	0	0.000456607	0	0.00224623	0	0	0.000283035	0	0.002179
	319	90-2-1	F	20	LR1	MB	8	1	2	1		24756248	355626	882983	1696146	1427058	6382005	1434653	40386	0	155220	19824	0	11037	0	0	0	28461	84221		1	0.0143651	0.0356671	0.0685139	0.0576444	0.257794	0.0579511	0.00163135	0	0.00626993	0.000800768	0	0.000445827	0	0	0	0.00114965	0.00340201
	320	91-1-1	F	47	UL6	MB	4	0	1	1		27929157	0	992005	1537696	1218462	14188799	1463515	177491	0	0	0	0	6832	0	0	14205	46028	27645		1	0	0.0355186	0.055057	0.0436269	0.508028	0.052401	0.00635504	0	0	0	0	0.000244619	0	0	0.000508608	0.00164803	0.000989826
	321	91-2-1	F	47	LR5	MB	6	1	2	1		20812205	530374	1331454	979778	1332925	4346364	520348	85189	25887	0	0	13755	30377	0	0	11937	0	81523		1	0.0254838	0.0639747	0.0470771	0.0640454	0.208837	0.0250021	0.00409322	0.00124384	0	0	0.00066091	0.00145958	0	0	0.000573558	0	0.00391708
[truncated: 18 more columns]

## Sheet: clusterall
						MIN	2	0	0	0		14407	0	0	0	0	0	0	0	0	0	0	0	0	0	0	0	0	369		1	0	0	0	0	0	0	0	0	0	0	0	0	0	0	0	0	0.000301563
						MAX	12	1	2	2		3481530123	104634724	33626515	38743635	49730445	158257725	69776379	31554267	371792	26678620	1246947	1879830	2579053	2345648	5888817	2288962	8811057	15553497		1	0.299041	0.428772	0.278882	0.239732	0.508028	0.34848	0.0506202	0.0153393	0.145268	0.0156486	0.138197	0.343764	0.34548	0.0925857	0.117718	0.202785	0.575317
						AVG	4.73039	0.441176	0.877451	0.882353		4.3575e+07	1.41368e+06	1.02244e+06	1.00565e+06	1.14858e+06	3.10853e+06	1717972	221656	6496.96	292775	16494.7	34662.9	154960	48108.7	63715.2	34998.4	207770	709346		1	0.0297722	0.0344242	0.019098	0.0268916	0.071091	0.0456677	0.00249284	0.00035974	0.00624193	0.000399391	0.00231052	0.02594	0.00575281	0.0040467	0.00621978	0.0114366	0.100837
						S.E.	0.168098	0.0348494	0.0538161	0.0489374		1.87237e+07	553060	238212	288134	341402	1.0928e+06	529292	156099	2133.24	137392	7639.9	11146.5	24417.4	14552.9	29818.2	12165.6	65372.3	118562		0	0.00399174	0.00410303	0.00273336	0.00271436	0.0073257	0.00475224	0.000522317	9.27734e-05	0.0012468	0.00012348	0.000734005	0.00340209	0.00181288	0.000873596	0.00111386	0.00194362	0.00809397
						MEDIAN	4	0	1	1		5.36194e+06	3654.5	13153.5	4410.5	40965	170678	111722	0	0	0	0	0	28637.5	1038	0	4660	0	195749		1	0.00141699	0.00399413	0.000655717	0.00770066	0.0273348	0.0156736	0	0	0	0	0	0.0065071	0.000331599	0	0.000824315	0	0.0497979
						S.D.	2.39502	0.496528	0.766761	0.697251		2.66772e+08	7.87989e+06	3.39399e+06	4.10528e+06	4.86423e+06	1.55699e+07	7.54125e+06	2.22407e+06	30394	1.95753e+06	108852	158813	347895	207347	424843	173333	931412	1.68924e+06		0	0.0568735	0.0584592	0.0389444	0.0386736	0.104375	0.067709	0.00744187	0.00132182	0.0177642	0.00175931	0.010458	0.0484724	0.0258295	0.0124468	0.0158701	0.0276923	0.115321
								BOP (%)	-	0.441176
								GI	0	74
									1	81
									2	49
								plI	0	63
									1	102
									2	39
	N=	204										genome copy number /paper point																			genome (%)
	GCF No.	Sample ID	Gender	Age	Teeth	BDMLP	PD	BOP	GI	PlI		Total bacteria	Porphyromonas gingivalis	Tannerella forsythia	Treponema denticola	Campylobacter rectus	Fusobacterium nucleatum subsp. animalis	Fusobacterium nucleatum subsp. nucleatum	Prevotella intermedia	Prevotella nigrescens	Streptococcus constellatus	Aggregatibacter actinomycetemcomitans	Capnocytophaga gingivalis	Streptococcus gordonii	Streptococcus intermedius	Veillonella parvula	Actinomyces viscosus	Selenomonas noxia	streptococci		Total bacteria	Porphyromonas gingivalis	Tannerella forsythia	Treponema denticola	Campylobacter rectus	Fusobacterium nucleatum subsp. animalis	Fusobacterium nucleatum subsp. nucleatum	Prevotella intermedia	Prevotella nigrescens	Streptococcus constellatus	Aggregatibacter actinomycetemcomitans	Capnocytophaga gingivalis	Streptococcus gordonii	Streptococcus intermedius	Veillonella parvula	Actinomyces viscosus	Selenomonas noxia	streptococci
	3	2-1-1	F	66	UL6	MP	5	1	2	1		2419043	132917	16496	50206	44489	311861	83793	75766	0	42268	0	3848	80918	32499	0	18007	0	194708		1	0.0549461	0.00681923	0.0207545	0.0183912	0.128919	0.0346389	0.0313207	0	0.017473	0	0.00159071	0.0334504	0.0134347	0	0.00744385	0	0.0804897
	4	2-2-1	F	66	UR7	P	9	1	2	1		27238279	4809184	674323	4252534	2096641	6196117	2859552	293116	0	3956860	0	0	0	7042	0	7782	0	2372090		1	0.17656	0.0247564	0.156123	0.0769741	0.227478	0.104983	0.0107612	0	0.145268	0	0	0	0.000258533	0	0.000285701	0	0.0870866
	5	3-1-1	M	59	UR7	MP	4	1	2	2		13277577	0	1984825	898480	985598	1129798	606171	37642	0	0	0	37396	37229	0	0	8219	147836	145494		1	0	0.149487	0.067669	0.0742303	0.0850907	0.0456537	0.00283501	0	0	0	0.00281648	0.0028039	0	0	0.000619014	0.0111343	0.0109579
	6	3-2-1	M	59	UL7	MP	12	1	2	1		11802936	0	2463475	342633	1090256	417788	1759240	43321	0	56503	0	0	5159	0	0	15386	0	52565		1	0	0.208717	0.0290295	0.0923716	0.035397	0.149051	0.00367036	0	0.0047872	0	0	0.000437095	0	0	0.00130357	0	0.00445355
	7	4-1-1	F	40	LR3	MB	5	1	1	1		12337541	666684	346146	106806	1411774	540672	560167	4176	0	34955	11144	17348	86572	9738	0	0	0	143935		1	0.054037	0.0280563	0.00865699	0.114429	0.0438233	0.0454035	0.000338479	0	0.00283322	0.000903259	0.00140611	0.00701696	0.000789298	0	0	0	0.0116664
	8	4-2-1	F	40	LL2	DB	7	1	2	1		9417920	512173	233085	69573	590679	151075	375257	4869	0	0	830	0	17430	6799	0	0	0	30163		1	0.0543828	0.0247491	0.0073873	0.0627186	0.0160412	0.039845	0.000516993	0	0	8.81299e-05	0	0.00185073	0.000721922	0	0	0	0.00320272
	9	5-1-1	F	76	UR1	MB	4	1	1	1		14407	0	0	0	0	205	0	0	0	0	0	0	0	0	0	0	797	369		1	0	0	0	0	0.0142292	0	0	0	0	0	0	0	0	0	0	0.0553203	0.0256125
	10	5-2-1	F	76	UL7	MB	6	0	1	1		30309	421	119	0	0	0	0	0	0	0	0	0	1598	0	0	376	0	4875		1	0.0138903	0.00392623	0	0	0	0	0	0	0	0	0	0.0527236	0	0	0.0124056	0	0.160843
	13	7-1-1	M	60	UR6	MP	4	0	1	1		1941257	44482	49390	16579	13709	67750	42478	0	0	10559	1982	41809	2102	0	0	10296	80134	47033		1	0.022914	0.0254423	0.00854034	0.00706192	0.0349001	0.0218817	0	0	0.00543926	0.00102099	0.0215371	0.0010828	0	0	0.00530378	0.0412794	0.0242281
	14	7-2-1	M	60	UL7	B	7	1	2	1		15233941	174383	650216	97827	1412428	729933	2913161	22790	0	0	0	0	0	0	0	0	0	4594		1	0.011447	0.0426821	0.00642165	0.0927159	0.0479149	0.191228	0.001496	0	0	0	0	0	0	0	0	0	0.000301563
	15	8-1-1	M	68	LL6	B	5	0	1	1		1183275	302536	19420	391	50059	508078	50295	0	0	0	0	0	0	0	0	0	0	859		1	0.255677	0.0164121	0.000330439	0.0423055	0.429383	0.0425049	0	0	0	0	0	0	0	0	0	0	0.000725951
	16	8-2-1	M	68	UR6	P	6	1	1	2		19051299	3655047	1428346	8784	726213	3232400	732607	0	0	0	0	30045	48458	0	50452	29044	116118	229806		1	0.191853	0.0749737	0.000461071	0.0381188	0.169668	0.0384544	0	0	0	0	0.00157706	0.00254355	0	0.00264822	0.00152452	0.00609502	0.0120625
	17	9-1-1	F	42	LL4	MB	5	1	2	1		13898035	0	786726	274323	190536	1854313	1831401	0	0	0	0	0	19517	28601	0	143156	0	57008		1	0	0.056607	0.0197383	0.0137096	0.133423	0.131774	0	0	0	0	0	0.0014043	0.00205792	0	0.0103004	0	0.00410187
	18	9-2-1	F	42	LR3	MB	9	1	2	1		24424930	0	2050224	295181	764448	5269737	2600574	0	0	0	0	0	0	0	0	0	0	14656		1	0	0.0839398	0.0120852	0.0312979	0.215752	0.106472	0	0	0	0	0	0	0	0	0	0	0.000600043
	19	10-1-1	M	29	UR4	MB	5	1	2	1		313603	0	560	0	966	1740	686	0	0	0	0	0	2642	0	0	7814	0	10167		1	0	0.0017857	0	0.00308033	0.00554842	0.00218748	0	0	0	0	0	0.00842466	0	0	0.0249169	0	0.03242
	20	10-2-1	M	29	UR2	MB	9	1	2	2		16475612	523326	1596660	226731	1530854	7107428	823595	111210	0	0	144887	0	0	0	0	21909	0	5854		1	0.0317637	0.0969105	0.0137616	0.0929164	0.431391	0.0499887	0.00674998	0	0	0.00879403	0	0	0	0	0.00132978	0	0.000355313
	21	11-1-1	F	46	UL5	MB	4	0	1	2		1944045	4934	2037	4363	12462	35600	10854	0	0	0	0	0	134645	3061	0	3223	0	374739		1	0.00253801	0.00104782	0.00224429	0.00641035	0.0183123	0.0055832	0	0	0	0	0	0.0692602	0.00157455	0	0.00165788	0	0.192763
	22	11-2-1	F	46	UR6	MB	11	1	2	2		1325938273	104634724	23019234	38743635	49730445	158257725	69776379	31554267	0	3569974	0	0	511329	2345648	0	0	8811057	10547238		1	0.0789137	0.0173607	0.0292198	0.0375059	0.119355	0.0526242	0.0237977	0	0.00269241	0	0	0.000385636	0.00176905	0	0	0.00664515	0.00795455
	23	12-1-1	F	23	UL1	DB	5	0	1	1		4476542	0	295810	1514	490363	121270	1070107	0	0	0	1053	1950	4447	0	0	5935	0	22244		1	0	0.06608	0.000338207	0.109541	0.0270901	0.239048	0	0	0	0.000235226	0.000435604	0.000993401	0	0	0.0013258	0	0.00496901
	24	12-2-1	F	23	UL6	MB	9	0	2	1		23414117	2802120	5802288	381613	1154700	2742924	897272	5599	0	0	366397	0	0	0	0	0	0	86651		1	0.119677	0.247812	0.0162984	0.0493164	0.117148	0.0383218	0.000239129	0	0	0.0156486	0	0	0	0	0	0	0.0037008
	25	13-1-1	M	28	UL4	MB	4	0	1	1		431505	0	338	248	0	0	429	0	0	0	0	779	148336	666	0	2869	0	179557		1	0	0.000783305	0.000574733	0	0	0.000994195	0	0	0	0	0.00180531	0.343764	0.00154344	0	0.00664882	0	0.416118
	26	13-2-1	M	28	UL2	MB	7	1	2	1		18486441	0	2288755	581400	1081636	1042474	2776032	37412	0	0	139752	0	16965	3834	0	16673	0	37924		1	0	0.123807	0.0314501	0.0585097	0.0563913	0.150166	0.00202375	0	0	0.0075597	0	0.0009177	0.000207395	0	0.000901904	0	0.00205145
	27	14-1-1	F	47	UR6	MB	4	0	1	1		482405	0	4513	1354	6510	7530	3226	0	0	11681	152	0	7745	530	0	1175	0	71389		1	0	0.00935521	0.00280677	0.0134949	0.0156093	0.00668733	0	0	0.0242141	0.000315088	0	0.016055	0.00109866	0	0.00243571	0	0.147986
	28	14-2-1	F	47	LL6	MB	7	1	2	2		524553451	20496453	4895774	27556226	16399968	21961660	3864522	464680	371792	3269566	0	443053	1539659	261090	5888817	168028	7194396	8055285		1	0.0390741	0.00933322	0.0525327	0.0312646	0.0418673	0.00736726	0.000885858	0.000708778	0.00623305	0	0.000844629	0.00293518	0.000497738	0.0112263	0.000320326	0.0137153	0.0153565
	29	15-1-1	M	39	UR5	DB	5	0	1	1		9374041	1177599	1560494	275871	223769	895702	118152	0	0	0	0	0	62048	0	13783	0	0	200003		1	0.125623	0.16647	0.0294293	0.0238711	0.0955513	0.0126042	0	0	0	0	0	0.00661913	0	0.00147034	0	0	0.0213358
	30	15-2-1	M	39	LL7	DB	8	0	1	1		19983643	1403957	1024613	2270225	171270	2355348	306695	0	13310	0	0	0	5641	0	44014	0	0	118456		1	0.0702553	0.0512726	0.113604	0.00857051	0.117864	0.0153473	0	0.000666045	0	0	0	0.000282281	0	0.0022025	0	0	0.00592765
	31	16-1-1	F	65	UR1	MB	4	1	1	0		5146630	559663	143868	70701	808805	497040	847237	4080	0	0	0	0	3223	63803	0	4123	0	68140		1	0.108744	0.0279538	0.0137373	0.157152	0.0965758	0.16462	0.000792752	0	0	0	0	0.000626235	0.012397	0	0.000801107	0	0.0132397
	32	16-2-1	F	65	UL2	DB	8	1	2	1		10665524	1258922	263107	234422	1378266	988160	161519	6763	0	13518	0	0	0	45166	0	0	0	39742		1	0.118037	0.0246689	0.0219794	0.129226	0.0926499	0.015144	0.000634099	0	0.00126745	0	0	0	0.00423477	0	0	0	0.00372621
	35	18-1-1	M	63	UR4	DB	4	0	1	2		5365519	352688	198756	17857	291944	439022	153829	0	0	0	0	4572	61734	19462	0	25946	115796	593171		1	0.0657323	0.0370432	0.0033281	0.0544111	0.0818228	0.0286699	0	0	0	0	0.000852108	0.0115057	0.00362724	0	0.00483569	0.0215815	0.110552
	36	18-2-1	M	63	UL4	DB	8	1	2	2		13821450	858295	398771	467554	513242	341046	455573	46502	12799	0	0	11732	21024	0	0	13117	445117	170038		1	0.0620988	0.0288516	0.0338281	0.0371337	0.0246751	0.0329613	0.00336448	0.000926024	0	0	0.000848826	0.00152111	0	0	0.000949032	0.0322048	0.0123025
	37	19-1-1	F	45	UL3	MB	4	0	1	1		6878978	491739	249942	627253	593040	1142663	167517	0	0	0	0	0	32530	0	0	2299	0	189313		1	0.0714843	0.0363342	0.091184	0.0862105	0.166109	0.024352	0	0	0	0	0	0.0047289	0	0	0.000334207	0	0.0275205
	38	19-2-1	F	45	UR3	MB	8	1	2	2		4610790	171977	130719	126022	76496	405694	1109101	3821	0	0	592	0	2626	0	0	0	0	14070		1	0.0372988	0.0283507	0.027332	0.0165906	0.087988	0.240545	0.000828708	0	0	0.000128394	0	0.000569534	0	0	0	0	0.00305154
	39	20-1-1	F	38	UR5	MB	4	0	1	1		5126783	0	1943	1685	3639	32596	5817	0	8371	0	0	9608	80661	22439	230760	83821	365617	532441		1	0	0.00037899	0.000328666	0.000709802	0.00635798	0.00113463	0	0.0016328	0	0	0.00187408	0.0157333	0.00437682	0.0450107	0.0163496	0.0713151	0.103855
	40	20-2-1	F	38	UR4	MB	7	1	2	2		70630723	6704503	2369176	4015641	4429566	4054457	1428371	58459	30347	176995	0	0	384770	22058	0	90308	0	1205492		1	0.0949233	0.0335431	0.056854	0.0627144	0.0574036	0.0202231	0.000827671	0.000429657	0.00250592	0	0	0.00544763	0.0003123	0	0.00127859	0	0.0170675
	69	21-1-1	M	59	UL6	MP	3	0	1	1		20835587	10877	4853	2875	0	6729195	1268151	47684	14153	169238	0	0	1071989	0	87684	709244	21233	3233828		1	0.00052204	0.000232919	0.000137985	0	0.322966	0.0608647	0.00228858	0.000679271	0.00812255	0	0	0.0514499	0	0.00420838	0.03404	0.00101907	0.155207
	70	21-2-1	M	59	UR6	MP	8	1	1	1		13612348	550716	1722666	579835	146350	6558557	1026210	0	0	0	0	0	68904	0	0	0	0	373956		1	0.0404571	0.126552	0.0425963	0.0107513	0.481809	0.0753882	0	0	0	0	0	0.00506187	0	0	0	0	0.0274718
	71	22-1-1	M	59	LR3	MB	3	0	1	0		339250	0	408	279	4446	1754	920	0	0	0	0	1012	7793	0	0	1281	5092	70132		1	0	0.00120265	0.000822402	0.0131054	0.00517023	0.00271186	0	0	0	0	0.00298305	0.0229713	0	0	0.00377598	0.0150096	0.206727
	72	22-2-1	M	59	LL5	MB	6	1	2	1		26678125	0	2757843	970162	1454846	4780180	2029112	141207	0	368276	0	0	0	0	0	9090	67865	193681		1	0	0.103375	0.0363654	0.0545333	0.17918	0.076059	0.00529299	0	0.0138044	0	0	0	0	0	0.000340729	0.00254384	0.00725992
	73	23-1-1	M	68	UR6	MP	3	0	1	2		14323030	0	11189	2563	18549	620881	805070	0	28900	525284	0	338324	155661	53608	0	0	30899	1711912		1	0	0.000781189	0.000178943	0.00129505	0.0433484	0.0562081	0	0.00201773	0.0366741	0	0.023621	0.0108679	0.00374278	0	0	0.00215729	0.119522
	74	23-2-1	M	68	UR7	DB	8	1	1	2		12763205	66012	152246	1863	31267	1955229	1462766	0	0	651509	0	342765	60350	51783	0	3315	38191	1026347		1	0.00517206	0.0119285	0.000145966	0.00244978	0.153193	0.114608	0	0	0.0510459	0	0.0268557	0.00472844	0.00405721	0	0.000259731	0.00299227	0.0804145
	75	24-1-1	M	29	UR6	MB	4	0	1	0		1915700	0	0	0	7786	13060	68450	0	0	0	935	7089	94603	126378	9514	14649	0	366193		1	0	0	0	0.00406431	0.00681735	0.0357311	0	0	0	0.000488072	0.00370048	0.049383	0.0659696	0.00496633	0.00764681	0	0.191154
	76	24-2-1	M	29	UR7	MB	9	1	1	1		508352685	997996	20545658	1676132	1041285	14020060	3835707	166219	0	26678620	0	641530	2214491	0	0	0	0	15553497		1	0.0019632	0.0404161	0.00329718	0.00204835	0.0275794	0.00754537	0.000326976	0	0.0524805	0	0.00126198	0.00435621	0	0	0	0	0.0305959
	77	25-1-1	M	57	LL3	MB	4	0	1	0		8616372	27227	22163	24998	74542	2232024	374653	0	0	458432	0	27680	111866	0	0	40513	0	1594573		1	0.00315991	0.0025722	0.00290122	0.0086512	0.259045	0.0434815	0	0	0.0532048	0	0.00321249	0.012983	0	0	0.00470186	0	0.185063
	78	25-2-1	M	57	LL6	B	7	0	1	2		52630189	1071277	806287	125365	142560	2862191	582420	0	0	5939096	0	0	131994	0	0	11352	0	5696352		1	0.0203548	0.0153199	0.002382	0.00270871	0.0543831	0.0110663	0	0	0.112846	0	0	0.00250795	0	0	0.000215694	0	0.108234
	81	27-1-1	M	59	UR3	DB	4	1	1	1		2512629	2403	191931	1186	1862	629263	119178	0	0	14192	0	1329	0	28150	0	0	0	39796		1	0.000956369	0.0763865	0.000472016	0.000741056	0.25044	0.0474316	0	0	0.00564827	0	0.000528928	0	0.0112034	0	0	0	0.0158384
	82	27-2-1	M	59	UL4	DB	11	1	1	2		29876964	1678507	2882011	3246017	515730	4855543	5906404	17951	0	297401	0	0	0	0	0	0	0	152719		1	0.0561806	0.0964626	0.108646	0.0172618	0.162518	0.197691	0.000600831	0	0.00995419	0	0	0	0	0	0	0	0.0051116
	83	28-1-1	M	46	UR5	MB	4	1	2	2		11322242	512301	1738438	954385	450792	818630	1569644	6192	0	174850	1908	7477	31189	49496	0	10671	0	250374		1	0.0452473	0.153542	0.0842929	0.0398147	0.0723028	0.138634	0.000546888	0	0.0154431	0.000168518	0.000660382	0.00275467	0.00437157	0	0.000942481	0	0.0221135
	84	28-2-1	M	46	UR3	DB	6	1	2	1		9705832	610305	855113	968951	498468	328156	185505	16187	0	73114	0	4365	24527	0	0	6865	0	86875		1	0.0628802	0.088103	0.0998318	0.0513576	0.0338102	0.0191127	0.00166776	0	0.007533	0	0.00044973	0.00252704	0	0	0.000707307	0	0.0089508
	85	29-1-1	F	42	LL2	DB	3	0	1	1		577751	0	562	0	1370	2051	3243	0	0	0	0	975	52147	755	0	67444	0	67397		1	0	0.000972737	0	0.00237126	0.00354997	0.00561314	0	0	0	0	0.00168758	0.0902586	0.00130679	0	0.116735	0	0.116654
	86	29-2-1	F	42	LR2	DB	6	1	2	1		590642747	29763711	33626515	25831943	27006942	152687930	69752057	0	0	1397172	0	0	132824	0	0	0	0	981350		1	0.0503921	0.0569321	0.0437353	0.0457247	0.258511	0.118095	0	0	0.00236551	0	0	0.00022488	0	0	0	0	0.0016615
	87	30-1-1	F	52	UR4	MB	4	1	1	1		4648767	120311	205149	98750	104137	245653	596411	16313	0	0	0	0	148834	5364	0	36476	0	269981		1	0.0258802	0.0441298	0.0212422	0.022401	0.0528426	0.128294	0.0035091	0	0	0	0	0.0320158	0.00115385	0	0.00784638	0	0.0580758
	88	30-2-1	F	52	UR2	DB	6	1	2	2		10079106	224884	391363	271202	405699	908592	1120573	510206	0	0	1104	0	8683	3304	0	6630	334813	56787		1	0.0223119	0.0388291	0.0269073	0.0402515	0.0901461	0.111178	0.0506202	0	0	0.000109534	0	0.000861485	0.000327807	0	0.000657796	0.0332185	0.00563413
	89	31-1-1	M	40	LR3	MB	4	1	2	2		10639236	18297	153605	38516	713684	101378	483325	13283	5389	0	0	80678	131066	37647	19562	0	687385	229716		1	0.00171977	0.0144376	0.00362018	0.0670804	0.00952869	0.0454285	0.00124849	0.000506521	0	0	0.00758306	0.0123191	0.00353851	0.00183867	0	0.0646085	0.0215914
	90	31-2-1	M	40	LR1	DB	6	1	2	2		14910753	0	934304	145529	1509890	416350	2192421	25810	0	0	0	41922	55505	62859	0	0	296140	195029		1	0	0.0626597	0.00976	0.101262	0.0279228	0.147036	0.00173097	0	0	0	0.00281153	0.00372248	0.00421568	0	0	0.0198608	0.0130798
	91	32-1-1	M	31	UR4	MB	4	0	2	2		5358362	6004	7124	5429	22261	26604	9763	4810	0	122572	0	2133	12227	16676	65974	13552	60204	212526		1	0.00112049	0.00132951	0.00101318	0.00415444	0.00496495	0.00182201	0.000897662	0	0.0228749	0	0.000398069	0.00228185	0.00311215	0.0123123	0.00252913	0.0112355	0.0396625
	92	32-2-1	M	31	UL4	MB	9	1	2	2		210389195	19723710	8333043	16712214	13917509	23650966	8126622	233835	0	1912536	0	0	331533	162345	395695	121171	0	2618560		1	0.0937487	0.0396078	0.0794348	0.0661513	0.112415	0.0386266	0.00111144	0	0.00909047	0	0	0.00157581	0.000771641	0.00188078	0.000575937	0	0.0124463
	93	HC01-1-1	M	49	UL6	M	3	0	0	1		6658743	32361	27048	38547	214614	545215	336920	13110	0	0	0	64818	74165	2102	11152	4352	198007	165447		1	0.00485993	0.00406203	0.00578893	0.0322304	0.0818796	0.0505981	0.00196884	0	0	0	0.00973427	0.011138	0.000315675	0.00167479	0.000653577	0.0297364	0.0248466
	96	HC02-1-1	M	30	UL6	M	3	0	0	0		3271644	37566	15118	2976	195213	53991	124009	3561	0	0	0	35627	13825	5459	0	2685	23186	278200		1	0.0114823	0.00462092	0.000909634	0.0596682	0.0165027	0.0379042	0.00108844	0	0	0	0.0108896	0.0042257	0.00166858	0	0.000820688	0.00708696	0.0850337
	99	HC03-1-1	M	44	UL6	M	3	0	0	1		3428398	0	0	641	42795	0	1236	0	0	0	0	73174	136587	0	0	3773	0	1040806		1	0	0	0.000186968	0.0124825	0	0.000360518	0	0	0	0	0.0213435	0.0398399	0	0	0.00110051	0	0.303584
	102	HC04-1-1	M	29	UL6	M	3	1	1	1		14953350	0	286340	3225	49814	110082	144919	0	9263	0	7274	33132	557987	13508	741254	5235	331109	2365049		1	0	0.0191489	0.000215671	0.00333129	0.00736169	0.00969141	0	0.00061946	0	0.000486446	0.00221569	0.0373152	0.000903343	0.0495711	0.000350089	0.0221428	0.158162
	105	HC05-1-1	M	33	UL6	M	3	0	0	1		17773468	0	0	2281	49354	1485682	231194	0	0	0	1222	248186	177781	162907	0	27494	0	2875836		1	0	0	0.000128337	0.00277684	0.0835899	0.0130078	0	0	0	6.87542e-05	0.0139638	0.0100026	0.00916574	0	0.00154691	0	0.161805
	108	HC06-1-1	F	25	UL6	M	2	0	0	0		16136169	0	123406	5837	486981	329763	173916	0	0	0	19650	32879	334833	0	28796	11571	1036701	1321958		1	0	0.00764779	0.000361734	0.0301795	0.0204363	0.010778	0	0	0	0.00121776	0.0020376	0.0207505	0	0.00178456	0.000717085	0.064247	0.0819251
	111	HC07-1-1	M	33	UL6	M	3	0	0	0		5090940	0	0	0	0	0	0	0	0	0	0	0	24492	0	0	4215	0	903095		1	0	0	0	0	0	0	0	0	0	0	0	0.0048109	0	0	0.000827941	0	0.177393
	114	HC08-1-1	F	25	UL6	M	3	0	0	1		9653376	0	0	0	268398	125811	55324	0	148076	0	2251	33478	340085	151551	29082	6725	539052	959542		1	0	0	0	0.0278035	0.0130328	0.00573105	0	0.0153393	0	0.000233183	0.00346801	0.0352296	0.0156993	0.00301262	0.000696647	0.0558408	0.0993996
	117	HC09-1-1	F	24	UL6	M	3	0	0	0		3673062	0	0	599	17499	56058	24319	0	0	0	0	12325	591105	1800	16916	44107	0	1051940		1	0	0	0.000163079	0.00476415	0.0152619	0.00662091	0	0	0	0	0.00335551	0.16093	0.000490054	0.00460542	0.0120082	0	0.286393
	120	HC10-1-1	F	23	UL6	M	2	0	0	0		1153635	0	0	0	1069	0	1391	0	0	0	0	0	33456	513	0	928	0	530463		1	0	0	0	0.000926636	0	0.00120575	0	0	0	0	0	0.0290005	0.000444681	0	0.000804414	0	0.459819
	123	HC11-1-1	M	45	UL6	M	3	0	0	1		4326397	0	1224	1218	4284	71502	519840	0	0	0	0	2529	755985	74504	0	141716	0	1428886		1	0	0.000282914	0.000281528	0.0009902	0.0165269	0.120155	0	0	0	0	0.000584551	0.174738	0.0172208	0	0.0327561	0	0.330272
	126	HC12-1-1	M	40	UL6	M	2	0	0	0		327324	0	0	0	0	0	0	0	0	0	0	0	15574	0	0	697	2422	96839		1	0	0	0	0	0	0	0	0	0	0	0	0.0475798	0	0	0.00212939	0.0073994	0.295851
	129	HC13-1-1	F	22	UL6	M	2	0	0	0		455274	0	346	0	0	0	1456	0	0	0	0	0	2984	0	0	2852	0	84392		1	0	0.000759982	0	0	0	0.00319807	0	0	0	0	0	0.00655429	0	0	0.00626436	0	0.185365
	132	HC14-1-1	M	35	UL6	M	2	0	0	0		5261913	0	0	0	2179	0	1072	0	0	0	0	9743	79982	0	0	0	7304	1627750		1	0	0	0	0.000414108	0	0.000203728	0	0	0	0	0.00185161	0.0152002	0	0	0	0.00138809	0.309346
	136	HC15-2-1	M	51	UR1	M	2	0	0	1		87270	0	149	0	0	0	312	0	0	0	0	0	1284	0	0	474	0	26580		1	0	0.00170735	0	0	0	0.00357511	0	0	0	0	0	0.014713	0	0	0.00543142	0	0.304572
	153	33-1-1	F	23	UR7	P	4	0	1	1		27621456	721840	2343407	3845	2480165	2518294	1601665	0	0	0	3231	28291	61490	0	40410	11980	21419	348710		1	0.0261333	0.0848401	0.000139203	0.0897912	0.0911717	0.0579863	0	0	0	0.000116974	0.00102424	0.00222617	0	0.00146299	0.000433721	0.000775448	0.0126246
	154	33-2-1	F	23	UL6	P	9	1	1	2		9512470	17368	2606	4132	4348	18072	37637	0	0	0	0	0	14426	3264	0	0	0	116054		1	0.00182581	0.000273956	0.000434377	0.000457084	0.00189982	0.0039566	0	0	0	0	0	0.00151654	0.000343129	0	0	0	0.0122002
	156	34-1-1	F	26	UL4	MB	4	0	1	0		1229589	1475	1488	673	3265	6313	929	0	0	0	2036	0	225454	0	0	2034	0	184254		1	0.00119959	0.00121016	0.000547337	0.00265536	0.00513424	0.000755537	0	0	0	0.00165584	0	0.183357	0	0	0.00165421	0	0.14985
	158	34-3-1	F	26	LL6	MB	10	1	1	1		16446053	972879	725124	632300	608027	2853898	298235	15427	0	0	10060	18701	98594	9868	0	27241	25817	102024		1	0.0591558	0.0440911	0.0384469	0.036971	0.173531	0.0181341	0.000938037	0	0	0.000611697	0.00113711	0.00599499	0.000600022	0	0.00165639	0.0015698	0.00620356
	159	35-1-1	F	41	LR6	MB	4	0	0	1		4631452	13226	4593	1912	14376	78584	407152	0	0	0	1197	10790	350951	166350	0	5041	17899	911668		1	0.00285569	0.000991698	0.000412829	0.00310399	0.0169675	0.0879102	0	0	0	0.00025845	0.00232972	0.0757756	0.0359175	0	0.00108843	0.00386466	0.196843
	160	35-2-1	F	41	LR7	DB	11	1	1	1		7649783	1540187	1414425	893809	437093	148116	266549	16589	0	0	0	0	0	0	0	0	0	8806		1	0.201337	0.184897	0.116841	0.057138	0.0193621	0.034844	0.00216856	0	0	0	0	0	0	0	0	0	0.00115114
	161	36-1-1	F	32	UL5	MB	2	1	1	0		2211258	0	849	664	1415	2935	5824	0	0	0	0	0	24725	0	0	158752	0	57678		1	0	0.000383944	0.000300282	0.000639907	0.0013273	0.00263379	0	0	0	0	0	0.0111814	0	0	0.0717926	0	0.0260838
	162	36-2-1	F	32	UL6	MB	7	1	1	1		59175991	197248	1173662	2037790	1759021	11510218	13818533	16168	26519	206238	0	0	0	0	0	61873	0	116042		1	0.00333324	0.0198334	0.0344361	0.0297252	0.194508	0.233516	0.000273219	0.000448138	0.00348516	0	0	0	0	0	0.00104558	0	0.00196096
	164	37-1-1	F	44	LL7	MB	4	1	1	1		2916280	8893	5681	11207	27040	213962	93136	0	0	5964	0	5060	260105	1051	102219	41107	143353	348030		1	0.00304943	0.00194803	0.00384291	0.00927209	0.0733681	0.0319366	0	0	0.00204507	0	0.00173509	0.0891907	0.000360391	0.0350512	0.0140957	0.0491561	0.11934
	165	37-2-1	F	44	LR7	MB	6	1	1	1		6601162	491112	603396	200145	698475	252747	94042	0	0	13300	0	7080	82655	0	0	5603	0	733913		1	0.0743978	0.0914075	0.0303197	0.105811	0.0382883	0.0142463	0	0	0.0020148	0	0.00107254	0.0125213	0	0	0.00084879	0	0.111179
	166	38-1-1	F	38	UL6	DB	5	1	1	1		14671286	1155365	3346524	17033	1327679	1113898	3531375	0	0	0	0	0	6498	77186	0	0	0	87678		1	0.0787501	0.2281	0.00116098	0.0904951	0.0759237	0.2407	0	0	0	0	0	0.000442906	0.00526102	0	0	0	0.00597616
	167	38-2-1	F	38	UR6	DB	9	1	1	1		18860410	689704	1226008	12638	745684	1196384	1476691	0	36825	908630	0	0	8526	0	0	9670	0	548615		1	0.0365689	0.0650043	0.000670081	0.039537	0.0634336	0.0782958	0	0.0019525	0.0481766	0	0	0.000452058	0	0	0.000512714	0	0.0290882
	168	39-1-1	M	48	LR6	B	4	1	2	2		16302999	3525997	2170048	1181606	3170284	1450585	236128	0	0	0	0	0	0	0	0	0	0	50105		1	0.216279	0.133107	0.0724778	0.19446	0.0889766	0.0144837	0	0	0	0	0	0	0	0	0	0	0.00307336
	169	39-2-1	M	48	LL6	B	6	1	1	2		2189002	0	990	3922	76121	12136	30912	1905	0	0	822	12255	48745	14137	9204	0	100214	227436		1	0	0.000452261	0.00179168	0.0347743	0.00554408	0.0141215	0.00087026	0	0	0.000375514	0.00559844	0.0222681	0.00645819	0.00420466	0	0.0457807	0.103899
	170	40-1-1	F	59	LL7	B	4	0	0	1		5319882	0	1119	1121	0	272599	1720372	0	0	0	0	9576	236818	316346	48643	104652	0	461772		1	0	0.000210343	0.000210719	0	0.0512416	0.323385	0	0	0	0	0.00180004	0.0445156	0.0594649	0.00914362	0.0196719	0	0.0868012
	171	40-2-1	F	59	LL6	B	7	1	1	1		21786433	293863	811054	554846	2722460	1165909	4295068	0	9787	0	0	0	14352	5693	0	37164	0	33412		1	0.0134883	0.0372275	0.0254675	0.124961	0.0535154	0.197144	0	0.000449225	0	0	0	0.000658759	0.000261309	0	0.00170583	0	0.00153361
	177	41-1-1	F	43	UL5	MP	4	0	1	0		145939	0	0	0	814	546	1992	0	0	0	0	0	5146	0	1693	6757	4217	20272		1	0	0	0	0.00557767	0.00374129	0.0136495	0	0	0	0	0	0.0352613	0	0.0116007	0.0463002	0.0288956	0.138907
	178	41-2-1	F	43	UR5	MB	9	1	1	0		6045097	36155	464919	563829	15047	220802	267113	0	0	12483	0	0	4833	8324	0	17464	9788	35979		1	0.00598088	0.0769084	0.0932705	0.00248912	0.0365258	0.0441867	0	0	0.00206498	0	0	0.000799491	0.00137698	0	0.00288895	0.00161916	0.00595177
	179	42-1-1	M	48	LR5	DB	4	0	1	1		12955793	18071	2947353	23841	101956	2938011	1070546	0	0	439802	0	0	4887	16307	0	0	89045	275958		1	0.00139482	0.227493	0.00184018	0.00786953	0.226772	0.0826307	0	0	0.0339464	0	0	0.000377206	0.00125866	0	0	0.00687299	0.0213
	180	42-2-1	M	48	LR6	DB	7	1	1	2		15679732	37479	2569616	8126	96592	5821197	1957863	0	0	676261	0	4848	12014	73449	0	0	0	508095		1	0.00239028	0.163881	0.000518249	0.00616031	0.371256	0.124866	0	0	0.0431296	0	0.000309189	0.000766212	0.00468433	0	0	0	0.0324046
	181	43-1-1	M	62	UL1	MB	4	1	1	2		3728370	80347	1598620	325057	5568	18610	104811	0	0	0	0	0	0	10589	0	0	79956	12209		1	0.0215502	0.428772	0.0871847	0.00149341	0.00499146	0.0281117	0	0	0	0	0	0	0.00284012	0	0	0.0214453	0.00327462
	182	43-2-1	M	62	UR4	MB	7	1	1	1		2245316	41618	287392	301391	25410	66075	139634	0	0	0	0	0	2297	4797	0	3691	0	13704		1	0.0185355	0.127996	0.134231	0.0113169	0.0294279	0.062189	0	0	0	0	0	0.00102302	0.00213645	0	0.00164387	0	0.00610337
	183	44-1-1	F	34	UL1	DB	4	0	1	0		3417031	51126	73230	11232	28632	988670	158311	0	0	0	0	0	103785	1025	24153	12072	388969	127257		1	0.0149621	0.0214309	0.00328706	0.0083792	0.289336	0.04633	0	0	0	0	0	0.0303729	0.000299968	0.00706842	0.00353289	0.113832	0.037242
	184	44-2-1	F	34	UL3	MB	6	1	2	0		22478997	290690	1491137	72139	131458	3725301	1373998	0	0	0	0	0	69904	34211	122504	11918	1285824	131594		1	0.0129316	0.0663347	0.00320917	0.00584804	0.165724	0.0611236	0	0	0	0	0	0.00310975	0.00152191	0.00544971	0.000530184	0.0572011	0.00585409
	185	45-1-1	F	66	UL5	MB	4	0	1	1		5111169	0	1655	780	4902	15739	8347	0	0	0	0	5204	209506	0	11238	601678	9500	968728		1	0	0.000323801	0.000152607	0.000959076	0.00307933	0.00163309	0	0	0	0	0.00101816	0.0409898	0	0.00219871	0.117718	0.00185867	0.189532
	186	45-2-1	F	66	UL3	MB	6	1	2	1		4002602	31541	656222	68147	0	738002	116664	8100	0	373846	0	3349	14479	0	0	5578	23799	193763		1	0.00788012	0.163949	0.0170257	0	0.184381	0.029147	0.00202368	0	0.0934007	0	0.000836706	0.0036174	0	0	0.00139359	0.00594588	0.0484093
	187	46-1-1	M	47	UR4	MB	4	0	1	1		2387950	2967	2411	958	2307	127171	53730	0	0	0	0	0	86806	13494	22838	79172	81456	136678		1	0.00124249	0.00100965	0.000401181	0.000966101	0.0532553	0.0225005	0	0	0	0	0	0.0363517	0.00565087	0.00956385	0.0331548	0.0341113	0.0572365
	188	46-2-1	M	47	UL3	DB	7	1	1	1		10720477	182094	2474365	162819	172416	2416367	1515462	0	6951	0	0	0	8363	2505	0	10364	283577	9808		1	0.0169856	0.230807	0.0151877	0.0160829	0.225397	0.141361	0	0.000648385	0	0	0	0.000780096	0.000233665	0	0.000966748	0.0264519	0.000914885
	189	47-1-1	F	36	UR5	MB	5	1	1	1		8071760	6413	1441464	173938	951941	96079	106779	0	0	0	0	5156	41379	12783	0	0	0	149932		1	0.000794498	0.178581	0.021549	0.117935	0.0119031	0.0132287	0	0	0	0	0.00063877	0.00512639	0.00158367	0	0	0	0.0185749
	190	47-2-1	F	36	UR2	DB	7	1	1	1		24998031	0	2864880	587526	3093870	575478	3525378	40444	0	0	0	0	10948	0	0	35993	0	18915		1	0	0.114604	0.0235029	0.123765	0.0230209	0.141026	0.00161789	0	0	0	0	0.000437954	0	0	0.00143983	0	0.00075666
	191	48-1-1	F	24	UL7	MB	4	1	2	2		2637976	21582	3856	7095	65987	13656	13038	0	0	0	2218	2794	205471	779	104545	14872	14912	241067		1	0.00818127	0.00146173	0.00268956	0.0250143	0.0051767	0.00494243	0	0	0	0.000840796	0.00105915	0.0778896	0.000295302	0.0396308	0.00563766	0.00565282	0.0913833
	192	48-2-1	F	24	LR2	DB	6	1	2	2		93462369	8199321	2937484	8560919	2730621	4891383	2313722	279920	0	0	0	0	282848	193017	539136	0	4939389	1021470		1	0.0877286	0.0314296	0.0915975	0.0292163	0.0523353	0.0247557	0.002995	0	0	0	0	0.00302633	0.00206518	0.00576848	0	0.052849	0.0109292
	193	49-1-1	F	53	UL3	MB	4	0	1	2		14055800	238856	1435716	125320	121407	1100898	1120880	418876	14652	726671	0	3746	29096	7182	130110	9323	42348	616510		1	0.0169934	0.102144	0.00891589	0.0086375	0.0783234	0.079745	0.0298009	0.00104242	0.051699	0	0.000266509	0.00207004	0.000510963	0.00925668	0.000663285	0.00301285	0.0438616
	194	49-2-1	F	53	LL6	B	11	1	2	2		121225259	5566495	1681814	6471411	3166779	10110902	2306970	4049698	0	411900	0	0	0	102231	0	0	82787	320838		1	0.0459186	0.0138735	0.0533834	0.0261231	0.0834059	0.0190304	0.0334064	0	0.00339781	0	0	0	0.000843314	0	0	0.000682919	0.00264663
	195	50-1-1	F	61	UL4	MB	4	0	1	1		5189654	0	1007	0	7043	254870	90635	0	0	0	0	15301	561228	3942	0	80570	17879	916970		1	0	0.00019404	0	0.00135712	0.0491112	0.0174646	0	0	0	0	0.00294837	0.108144	0.000759588	0	0.0155251	0.00344512	0.176692
	196	50-2-1	F	61	UL6	DB	6	1	1	2		6950931	0	20929	4458	7373	64981	42747	0	0	0	0	40835	1181426	41272	10773	92959	8524	1335401		1	0	0.00301096	0.000641353	0.00106072	0.00934853	0.00614982	0	0	0	0	0.00587475	0.169967	0.00593762	0.00154986	0.0133736	0.00122631	0.192118
	197	51-1-1	F	35	UR3	MB	5	1	2	2		4391749	4959	9338	1532	7515	247223	51163	0	3252	13330	0	3889	0	146056	0	0	574356	106421		1	0.00112916	0.00212626	0.000348836	0.00171116	0.0562926	0.0116498	0	0.000740479	0.00303524	0	0.000885524	0	0.0332569	0	0	0.130781	0.024232
	198	51-2-1	F	35	UR2	MB	9	1	2	2		15443334	3612624	847914	538935	939691	871133	1336266	104246	7471	0	0	0	3738	2904	0	52696	136802	13289		1	0.233928	0.0549049	0.0348976	0.0608477	0.0564084	0.086527	0.00675023	0.000483769	0	0	0	0.000242046	0.000188042	0	0.00341222	0.00885832	0.000860501
	203	HCN01-1-1	F	23	RU1	MB	3	0	0	0		303021	0	236	0	0	0	0	0	0	0	161	0	543	0	0	0	6907	12285		1	0	0.000778824	0	0	0	0	0	0	0	0.000531316	0	0.00179196	0	0	0	0.0227938	0.0405417
	204	HCN02-1-1	F	23	RU1	MB	2	0	0	0		927991	0	0	0	0	0	0	0	0	0	0	0	1728	0	0	5079	0	15982		1	0	0	0	0	0	0	0	0	0	0	0	0.00186209	0	0	0.00547311	0	0.0172221
	205	HCN03-1-1	M	23	RU6	-	3	0	0	1		30981525	0	0	4284	41110	594592	198213	0	48105	0	0	113078	1252020	158467	212546	2288962	89852	8826891		1	0	0	0.000138276	0.00132692	0.0191918	0.00639778	0	0.0015527	0	0	0.00364985	0.0404118	0.00511489	0.00686041	0.0738815	0.00290018	0.284908
	206	HCN04-1-1	F	24	RU1	MB	2	0	0	0		4976302	0	0	647	0	0	0	0	0	0	0	0	112670	3502	0	1975	10100	2458829		1	0	0	0.000130016	0	0	0	0	0	0	0	0	0.0226413	0.000703735	0	0.000396881	0.00202962	0.494108
	207	HCN05-1-1	M	24	RL6	D	4	0	0	1		5701158	0	0	1341	0	250893	66213	0	8659	245151	0	0	28514	57550	141393	7387	31117	265109		1	0	0	0.000235215	0	0.0440074	0.011614	0	0.00151881	0.0430002	0	0	0.00500144	0.0100944	0.0248008	0.0012957	0.00545801	0.0465009
	208	HCN06-1-1	M	26	RU1	MB	3	0	0	1		616589	0	0	0	944	0	1517	0	0	0	0	0	10964	2517	0	10179	3833	197060		1	0	0	0	0.001531	0	0.00246031	0	0	0	0	0	0.0177817	0.00408214	0	0.0165086	0.00621646	0.319597
	209	HCN07-1-1	M	23	RU1	MB	2	0	0	0		1100438	0	0	0	0	0	1491	0	0	0	0	0	69978	2485	0	10839	0	334956		1	0	0	0	0	0	0.00135492	0	0	0	0	0	0.063591	0.00225819	0	0.00984971	0	0.304384
	210	HCN08-1-1	F	24	RU1	MB	3	0	0	0		1291781	9919	1369	6723	4727	0	2077	0	0	0	393	0	41423	2924	0	5911	2829	566563		1	0.00767855	0.00105978	0.00520444	0.00365929	0	0.00160786	0	0	0	0.000304231	0	0.0320666	0.00226354	0	0.00457585	0.00219	0.438591
	211	HCN09-1-1	M	23	RU1	MB	2	0	0	0		164644	0	0	0	0	0	0	0	0	0	0	0	0	0	0	0	3127	11910		1	0	0	0	0	0	0	0	0	0	0	0	0	0	0	0	0.0189925	0.0723379
	212	HCN10-1-1	M	23	RU6	M	4	0	0	0		8876457	0	0	995	36840	32503	12141	0	0	0	5397	58384	789315	233863	0	36420	119272	2690458		1	0	0	0.000112094	0.0041503	0.00366171	0.00136778	0	0	0	0.000608013	0.0065774	0.0889223	0.0263464	0	0.00410299	0.0134369	0.3031
	213	HCN11-1-1	F	23	RU1	MB	2	0	0	0		369620	3607	268	0	0	1300	1519	0	0	0	0	0	16193	411	0	0	0	42413		1	0.00975867	0.000725069	0	0	0.00351713	0.00410963	0	0	0	0	0	0.0438099	0.00111195	0	0	0	0.114748
	214	HCN12-1-1	M	27	RU1	MB	3	1	0	1		320251	3702	0	0	0	53637	5124	0	0	0	0	0	1199	9925	0	21367	0	24225		1	0.0115597	0	0	0	0.167484	0.016	0	0	0	0	0	0.00374394	0.0309913	0	0.0667195	0	0.0756438
	215	HCN13-1-1	F	23	RU1	MB	3	0	0	0		813750	1172	365	0	0	0	1835	0	0	0	0	0	23260	0	0	1397	0	125441		1	0.00144025	0.000448541	0	0	0	0.00225499	0	0	0	0	0	0.0285837	0	0	0.00171674	0	0.154152
	216	HCN14-1-1	M	23	RU1	MB	3	0	0	0		1924208	0	7901	515	52153	21695	45703	0	0	0	1923	2210	8075	2319	9918	3092	7708	156304		1	0	0.0041061	0.000267643	0.0271036	0.0112748	0.0237516	0	0	0	0.000999372	0.00114852	0.00419653	0.00120517	0.00515433	0.00160689	0.0040058	0.0812303
	217	HCN15-1-1	M	23	RU1	MB	2	0	0	0		3531700	11182	823	728	2303	0	1280	0	0	0	847	0	228984	0	0	76991	0	865559		1	0.00316618	0.000233032	0.000206133	0.000652094	0	0.000362432	0	0	0	0.000239828	0	0.0648368	0	0	0.0218	0	0.245083
	218	HCN16-1-1	M	24	RU1	MB	3	0	0	1		3086413	0	0	0	0	57904	44225	0	0	0	605	0	563141	56757	170725	15992	16141	553473		1	0	0	0	0	0.0187609	0.0143289	0	0	0	0.00019602	0	0.182458	0.0183893	0.055315	0.00518142	0.0052297	0.179326
	219	HCN17-1-1	M	23	RU1	MB	2	0	0	0		5448026	8795	0	846	3474	25524	34805	0	0	0	5217	126658	48636	88674	0	17238	8175	1095080		1	0.00161435	0	0.000155286	0.000637662	0.004685	0.00638855	0	0	0	0.000957595	0.0232484	0.00892727	0.0162764	0	0.00316408	0.00150054	0.201005
	220	HCN18-1-1	F	27	RU1	MB	2	0	0	0		1961466	0	0	0	5939	16958	16184	0	0	0	0	0	81189	47824	0	4823	0	455473		1	0	0	0	0.00302784	0.00864557	0.00825097	0	0	0	0	0	0.041392	0.0243818	0	0.00245888	0	0.23221
	221	HCN19-1-1	M	23	RU6	-	4	0	0	1		2814183	0	699	816	3875	41500	34469	0	4353	0	1683	0	116915	11225	0	0	0	1102651		1	0	0.000248385	0.00028996	0.00137695	0.0147467	0.0122483	0	0.00154681	0	0.000598042	0	0.0415449	0.00398872	0	0	0	0.391819
	222	HCN20-1-1	F	23	RU1	MB	2	0	0	0		336040	0	257	0	0	0	0	0	0	0	0	0	3185	14632	0	1143	0	67389		1	0	0.00076479	0	0	0	0	0	0	0	0	0	0.00947804	0.0435424	0	0.00340138	0	0.200539
	223	HCN21-1-1	F	23	RU1	MB	2	0	0	0		667172	0	0	0	0	0	426	0	0	0	0	0	5510	0	0	0	0	203623		1	0	0	0	0	0	0.000638516	0	0	0	0	0	0.00825874	0	0	0	0	0.305203
	224	HCN22-1-1	F	23	RU1	MB	3	0	0	0		662256	0	0	0	0	0	621	0	0	0	0	0	4645	1901	0	0	0	14044		1	0	0	0	0	0	0.000937704	0	0	0	0	0	0.0070139	0.00287049	0	0	0	0.0212063
	225	HCN23-1-1	M	26	RU1	MB	3	0	0	0		1564650	0	0	0	0	0	997	0	0	0	0	0	13637	0	0	0	0	311357		1	0	0	0	0	0	0.000637203	0	0	0	0	0	0.00871569	0	0	0	0	0.198995
	226	HCN24-1-1	M	23	RU1	MB	3	0	0	0		315337	0	0	0	0	0	1134	0	0	0	0	0	8509	0	0	16051	0	22164		1	0	0	0	0	0	0.00359615	0	0	0	0	0	0.0269838	0	0	0.0509011	0	0.0702867
	227	HCN25-1-1	F	23	RU1	MB	2	0	0	0		575786	6455	922	0	0	20398	2425	0	0	0	0	0	887	0	0	0	0	6287		1	0.0112108	0.00160129	0	0	0.0354264	0.00421163	0	0	0	0	0	0.0015405	0	0	0	0	0.010919
	228	HCN26-1-1	M	23	RU1	MB	3	0	0	0		175032	1444	194	0	0	0	0	0	0	0	0	0	2514	303	0	0	0	5200		1	0.00824992	0.00110837	0	0	0	0	0	0	0	0	0	0.0143631	0.00173111	0	0	0	0.0297089
	229	HCN27-1-1	M	23	RU1	MB	2	1	0	0		2347470	0	0	0	0	21213	18450	0	0	0	0	0	37144	0	0	0	56302	73188		1	0	0	0	0	0.00903654	0.00785953	0	0	0	0	0	0.015823	0	0	0	0.0239841	0.0311774
	230	HCN28-1-1	M	23	RU1	MB	2	0	0	0		4300070	7555	0	790	14062	25872	20032	0	0	0	0	20919	711728	76420	56840	2751	0	1252820		1	0.00175695	0	0.000183718	0.00327018	0.00601665	0.00465853	0	0	0	0	0.0048648	0.165515	0.0177718	0.0132184	0.000639757	0	0.291349
	231	HCN29-1-1	M	23	RU1	MB	2	0	0	0		1026997	3748	621	422	4459	3317	4518	0	0	0	0	0	38316	0	0	0	0	211879		1	0.00364948	0.000604676	0.000410907	0.00434178	0.0032298	0.00439923	0	0	0	0	0	0.0373088	0	0	0	0	0.206309
	232	HCN30-1-1	M	23	RU1	MB	3	0	0	0		6306075	3751	1086	53738	0	651681	184370	0	18491	0	0	2071	26616	2115	42316	0	491875	128582		1	0.000594823	0.000172215	0.00852162	0	0.103342	0.0292369	0	0.00293225	0	0	0.000328413	0.00422069	0.000335391	0.00671035	0	0.0780002	0.0203902
	233	HCN31-1-1	M	23	RU1	MB	2	0	0	1		3629413	0	0	630	27336	56591	49149	0	0	0	0	3727	171819	6179	74434	8888	25024	343483		1	0	0	0.000173582	0.0075318	0.0155923	0.0135419	0	0	0	0	0.00102689	0.0473407	0.00170248	0.0205086	0.00244888	0.00689478	0.0946387
	234	HCN32-1-1	M	23	RU1	MB	2	0	0	0		3521924	0	0	540	0	0	0	0	0	0	583	0	156847	0	0	0	0	2026224		1	0	0	0.000153325	0	0	0	0	0	0	0.000165535	0	0.0445345	0	0	0	0	0.575317
	235	HCN33-1-1	M	23	RU1	MB	3	0	0	0		909406	1603	367	0	1213	0	1373	0	0	0	0	0	21937	0	0	5233	0	83850		1	0.00176269	0.00040356	0	0.00133384	0	0.00150978	0	0	0	0	0	0.0241223	0	0	0.00575431	0	0.092203
	236	HCN34-1-1	M	24	RU1	MB	2	0	0	0		118117	0	165	0	0	0	0	0	0	0	0	0	1910	0	0	0	0	6046		1	0	0.00139692	0	0	0	0	0	0	0	0	0	0.0161704	0	0	0	0	0.0511865
	237	HCN35-1-1	M	23	RU1	MB	3	0	0	0		3407160	2486	9188	18347	1810	154997	97714	0	5459	0	0	0	13077	6770	19001	1346	57102	415513		1	0.00072964	0.00269667	0.00538484	0.000531234	0.0454916	0.028679	0	0.00160221	0	0	0	0.00383809	0.00198699	0.00557679	0.00039505	0.0167594	0.121953
	238	HCN36-1-1	M	23	RU1	MB	3	1	0	2		5640501	6669	0	890	0	19376	13591	0	28031	0	0	0	175614	2482	477103	2945	21452	1580602		1	0.00118234	0	0.000157787	0	0.00343516	0.00240954	0	0.00496959	0	0	0	0.0311345	0.000440032	0.0845852	0.000522117	0.00380321	0.280224
	239	HCN37-1-1	F	23	RU1	MB	2	0	0	0		2745009	2227	0	0	0	0	1193	0	0	0	0	0	193096	0	0	101693	0	368536		1	0.000811291	0	0	0	0	0.000434607	0	0	0	0	0	0.0703444	0	0	0.0370465	0	0.134257
	240	HCN38-1-1	M	23	RU1	MB	3	0	0	1		85424	938	138	0	0	0	0	0	0	0	0	0	206	467	0	2181	0	7069		1	0.0109805	0.00161547	0	0	0	0	0	0	0	0	0	0.0024115	0.00546685	0	0.0255315	0	0.0827519
	241	HCN39-1-1	F	23	RU1	MB	2	0	0	0		4379419	2467	0	650	304330	12356	39253	0	0	0	0	15855	90598	6981	0	96362	0	274760		1	0.000563317	0	0.000148422	0.069491	0.00282138	0.00896306	0	0	0	0	0.00362034	0.0206872	0.00159405	0	0.0220034	0	0.0627389
	242	HCN40-1-1	F	23	RU1	MB	3	0	0	0		766736	3065	434	275	0	10457	5904	0	0	0	0	0	21594	40660	0	0	2991	189706		1	0.00399746	0.000566036	0.000358663	0	0.0136383	0.00770017	0	0	0	0	0	0.0281635	0.05303	0	0	0.00390095	0.24742
	243	HCN41-1-1	M	23	RU1	MB	2	0	0	1		5759607	8289	1083	921	16540	0	3044	0	0	0	0	2764	97988	4729	0	20168	0	1890429		1	0.00143916	0.000188034	0.000159907	0.00287172	0	0.000528508	0	0	0	0	0.000479894	0.017013	0.000821063	0	0.00350163	0	0.328222
	244	HCN42-1-1	M	29	RU6	M	4	0	0	1		16769655	5014816	504509	301765	120192	3277828	639375	69470	0	0	0	4656	231033	30465	22032	7252	44747	1064816		1	0.299041	0.0300846	0.0179947	0.00716723	0.195462	0.0381269	0.0041426	0	0	0	0.000277644	0.0137768	0.00181667	0.0013138	0.000432448	0.00266833	0.0634966
	245	HCN43-1-1	F	24	RU1	MB	3	0	0	0		2258218	0	0	0	0	0	0	0	0	0	0	0	564972	0	0	10315	0	472317		1	0	0	0	0	0	0	0	0	0	0	0	0.250185	0	0	0.00456776	0	0.209155
	246	HCN44-1-1	M	24	RU1	MB	2	0	0	1		6604321	0	0	874	5571	49790	31272	0	5033	0	0	0	307087	229515	14084	18691	0	764738		1	0	0	0.000132338	0.000843539	0.007539	0.00473508	0	0.000762077	0	0	0	0.0464979	0.0347522	0.00213254	0.00283012	0	0.115794
	247	HCN45-1-1	M	23	RU1	MB	2	0	0	0		3866093	0	763	0	26837	27470	29095	0	0	0	1036	7497	788361	0	0	7929	44117	1080437		1	0	0.000197357	0	0.00694163	0.00710536	0.00752569	0	0	0	0.000267971	0.00193917	0.203917	0	0	0.00205091	0.0114113	0.279465
	248	HCN46-1-1	F	23	RU1	MB	3	0	0	0		617386	0	319	0	1353	0	2286	0	0	0	0	785	29427	1020	0	0	0	192333		1	0	0.000516695	0	0.0021915	0	0.00370271	0	0	0	0	0.00127149	0.0476639	0.00165213	0	0	0	0.311528
	249	HCN47-1-1	M	25	RU1	MB	3	0	0	0		1508248	0	494	0	6696	2474	4933	0	0	0	0	0	27380	0	0	3436	0	196469		1	0	0.000327532	0	0.00443959	0.00164031	0.00327068	0	0	0	0	0	0.0181535	0	0	0.00227814	0	0.130263
	250	HCN48-1-1	F	24	RU1	MB	3	0	0	0		103968	0	0	0	0	0	0	0	0	0	0	0	719	0	0	0	0	1898		1	0	0	0	0	0	0	0	0	0	0	0	0.00691559	0	0	0	0	0.0182556
	251	HCN49-1-1	M	23	RU1	MB	3	0	0	0		1196062	0	0	0	11115	1709	1855	0	0	0	330	0	14002	3133	0	1269	0	283578		1	0	0	0	0.009293	0.00142886	0.00155092	0	0	0	0.000275905	0	0.0117068	0.00261943	0	0.00106098	0	0.237093
	252	HCN50-1-1	M	24	RU1	MB	3	0	0	0		764368	0	0	0	0	0	0	0	0	0	0	0	11033	0	0	609	0	281680		1	0	0	0	0	0	0	0	0	0	0	0	0.0144341	0	0	0.000796737	0	0.368514
	253	HCN51-1-1	M	24	RU1	MB	3	0	0	0		549324	0	0	0	1289	1005	1852	0	0	0	0	0	23132	0	0	2394	4370	81659		1	0	0	0	0.00234652	0.00182952	0.00337142	0	0	0	0	0	0.0421099	0	0	0.00435808	0.00795523	0.148654
	254	HCN52-1-1	F	23	RU1	MB	2	0	0	0		2824366	0	0	0	0	11168	5092	0	0	0	0	0	28761	12407	11059	6896	14854	903465		1	0	0	0	0	0.00395416	0.00180288	0	0	0	0	0	0.0101832	0.00439284	0.00391557	0.00244161	0.00525923	0.319882
	255	HCN53-1-1	F	23	RU6	-	4	0	0	1		3472197	0	2669	0	0	8452	1126	0	0	0	0	0	861449	11812	0	47605	0	809004		1	0	0.000768678	0	0	0.00243419	0.00032429	0	0	0	0	0	0.248099	0.00340188	0	0.0137103	0	0.232995
	256	HCN54-1-1	M	23	RU1	MB	2	0	0	0		142911	0	157	0	0	0	334	0	0	0	0	0	3266	0	0	1455	0	17890		1	0	0.00109859	0	0	0	0.00233712	0	0	0	0	0	0.0228534	0	0	0.0101812	0	0.125183
	257	HCN55-1-1	F	23	RU1	MB	2	0	0	0		1956197	0	0	0	1623	5533	6828	0	0	0	0	4799	54784	875	0	53308	13213	287924		1	0	0	0	0.000829671	0.00282845	0.00349045	0	0	0	0	0.00245323	0.0280054	0.000447296	0	0.0272508	0.00675443	0.147186
	259	HCN57-1-1	F	23	RU1	MB	2	0	0	0		1178954	0	0	0	0	6872	3965	13369	0	0	0	0	19212	0	0	7624	5133	73887		1	0	0	0	0	0.0058289	0.00336315	0.0113397	0	0	0	0	0.0162958	0	0	0.00646675	0.00435386	0.0626717
	260	HCN58-1-1	M	25	RU1	MB	2	0	0	0		592424	0	337	0	0	0	551	0	0	0	0	0	3827	0	0	0	0	143181		1	0	0.000568849	0	0	0	0.000930077	0	0	0	0	0	0.0064599	0	0	0	0	0.241687
	261	55-1-1	F	35	RL5	MB	5	0	2	1		5010442	46218	61165	10711	40820	213865	586512	1750	7356	13825	0	0	19217	68407	0	72094	0	318323		1	0.00922434	0.0122075	0.00213774	0.00814699	0.0426839	0.117058	0.000349271	0.00146813	0.00275924	0	0	0.00383539	0.0136529	0	0.0143888	0	0.0635319
	262	55-2-1	F	35	LU5	MB	6	1	2	1		28580438	3939039	2282076	371140	1715232	7054759	7781844	29752	21332	37534	0	0	0	32295	0	0	50615	59499		1	0.137823	0.0798475	0.0129858	0.0600142	0.246839	0.272279	0.00104099	0.000746385	0.00131328	0	0	0	0.00112997	0	0	0.00177097	0.00208181
	265	57-1-1	F	73	RL4	DL	4	1	2	1		12248861	3398843	1007555	641812	944495	1116213	895364	111654	9336	0	1254	95735	35904	11852	0	8849	602434	277730		1	0.277482	0.082257	0.0523977	0.0771088	0.0911279	0.0730977	0.00911546	0.000762193	0	0.000102377	0.00781583	0.00293121	0.0009676	0	0.000722435	0.0491829	0.0226739
	266	57-2-1	F	73	RL7	DL	6	0	1	1		21653704	3628806	2541422	1248332	2778969	1584557	1216022	267436	126408	77411	0	22104	187949	35572	330230	9268	1105153	271509		1	0.167584	0.117367	0.0576498	0.128337	0.0731772	0.0561577	0.0123506	0.00583771	0.00357495	0	0.0010208	0.00867976	0.00164277	0.0152505	0.00042801	0.0510376	0.0125387
	267	58-1-1	F	68	RU7	MP	4	0	1	1		13602500	0	0	0	0	0	0	0	0	0	0	1879830	1148354	0	0	140268	505017	2363906		1	0	0	0	0	0	0	0	0	0	0	0.138197	0.0844223	0	0	0.0103119	0.0371268	0.173785
	268	58-2-1	F	68	LU7	MP	6	1	2	1		22384378	0	775366	164978	1050080	3402522	648078	764654	87079	925215	0	135226	83144	495992	0	22382	4539224	749360		1	0	0.0346387	0.00737023	0.0469113	0.152004	0.0289522	0.0341602	0.00389017	0.0413331	0	0.00604109	0.00371438	0.022158	0	0.000999894	0.202785	0.0334769
	269	59-1-1	F	63	RU6	DP	4	0	1	1		306622	0	439	2514	2259	2212	3317	0	0	4479	0	0	1302	0	0	4302	0	37835		1	0	0.00143173	0.00819902	0.00736738	0.00721409	0.0108179	0	0	0.0146076	0	0	0.00424627	0	0	0.0140303	0	0.123393
	270	59-2-1	F	63	RU7	DP	9	1	2	2		10351255	0	421723	1828135	1150545	247993	311090	0	0	127147	0	8886	19169	0	0	32762	374299	340878		1	0	0.0407412	0.17661	0.11115	0.0239578	0.0300534	0	0	0.0122832	0	0.000858447	0.00185185	0	0	0.00316503	0.0361598	0.0329311
	271	60-1-1	M	53	RU1	B	4	1	2	2		24507763	3499395	1084973	4905387	1063013	3309905	1618597	0	14165	0	0	0	14779	0	0	0	162219	26392		1	0.142787	0.0442706	0.200156	0.0433745	0.135055	0.0660443	0	0.00057798	0	0	0	0.000603033	0	0	0	0.00661909	0.00107688
	272	60-2-1	M	53	RU1	BO	8	1	2	2		24805044	2784382	1225449	6917672	867221	4457078	3513927	0	14670	0	0	16677	36676	0	0	0	28887	109756		1	0.112251	0.0494032	0.278882	0.0349615	0.179684	0.141662	0	0.000591412	0	0	0.000672323	0.00147857	0	0	0	0.00116456	0.00442475
	281	72-1-1	F	51	UL1	DB	2	0	0	0		13332230	442086	1117724	189320	910601	852134	467866	0	0	0	0	0	42802	0	0	0	41915	100095		1	0.0331592	0.0838362	0.0142002	0.0683007	0.0639153	0.0350929	0	0	0	0	0	0.00321042	0	0	0	0.00314389	0.00750775
	282	72-2-1	F	51	UL6	DP	6	1	2	1		22466927	1865101	1551124	37112	1849868	747245	206963	381759	0	374651	3563	223937	24836	32183	0	0	489023	344457		1	0.0830154	0.0690403	0.00165185	0.0823374	0.0332598	0.0092119	0.016992	0	0.0166757	0.000158589	0.00996741	0.00110545	0.00143246	0	0	0.0217664	0.0153317
	285	73-1-1	F	51	UR5	DB	5	1	1	1		399495	0	263	0	0	0	598	0	0	0	0	1476	34510	0	0	3245	0	94362		1	0	0.000658331	0	0	0	0.00149689	0	0	0	0	0.00369466	0.0863841	0	0	0.00812275	0	0.236203
	286	73-2-1	F	51	UR4	MB	7	1	1	1		1984518	25421	3357	7565	46940	186359	77277	13981	0	55518	0	0	6414	685611	0	25239	6610	529519		1	0.0128097	0.00169159	0.00381201	0.0236531	0.0939064	0.0389399	0.00704504	0	0.0279756	0	0	0.00323202	0.34548	0	0.0127179	0.00333078	0.266825
	291	74-1-1	F	73	UR3	MB	4	1	1	2		7002293	0	0	0	71858	283806	55975	0	25680	39253	0	141792	65114	216298	648312	110048	1050842	828900		1	0	0	0	0.0102621	0.0405304	0.00799381	0	0.00366737	0.00560574	0	0.0202494	0.00929895	0.0308896	0.0925857	0.015716	0.150071	0.118376
	292	74-2-1	F	73	UR4	MB	6	1	2	2		9334193	0	0	0	13713	1459844	265343	0	31107	322398	0	105163	92832	90350	521803	31822	1560825	854557		1	0	0	0	0.00146911	0.156397	0.028427	0	0.00333259	0.0345395	0	0.0112664	0.00994537	0.00967947	0.0559023	0.00340919	0.167216	0.0915512
	295	77-1-1	M	34	UR1	MB	4	0	1	1		6773471	0	118237	30252	336191	120450	37698	5058	4734	28632	19246	26532	299501	67589	193352	0	144407	485667		1	0	0.0174559	0.00446625	0.0496335	0.0177826	0.00556554	0.000746737	0.000698903	0.00422708	0.00284138	0.00391705	0.0442168	0.00997849	0.0285455	0	0.0213195	0.0717013
	296	77-2-1	M	34	LL4	MB	2	0	1	1		4915885	0	300097	27355	220520	57585	31715	3070	0	29881	0	3799	304058	24566	45323	2633	0	461893		1	0	0.0610464	0.00556461	0.0448587	0.0117141	0.00645153	0.000624506	0	0.00607846	0	0.000772801	0.0618521	0.00499727	0.0092197	0.000535611	0	0.0939593
	297	77-3-1	M	34	UR3	MB	6	1	1	1		12796212	0	604819	64521	647293	542652	124454	0	14992	357912	0	0	2788	0	0	0	0	181232		1	0	0.0472655	0.0050422	0.0505847	0.0424072	0.00972585	0	0.0011716	0.0279702	0	0	0.000217877	0	0	0	0	0.0141629
	298	77-4-1	M	34	LL6	MB	9	1	1	1		3481530123	0	13267201	7495926	35276203	19090414	6917943	0	0	0	730139	844127	1759194	1543159	0	0	0	5203458		1	0	0.00381074	0.00215306	0.0101324	0.00548334	0.00198704	0	0	0	0.000209718	0.000242459	0.000505293	0.000443242	0	0	0	0.00149459
	299	84-1-1	M	36	UL5	B	3	0	1	1		9002367	606354	357376	3009	299016	2612477	373760	156930	0	165083	0	0	0	0	0	0	0	95242		1	0.067355	0.039698	0.000334245	0.0332153	0.290199	0.041518	0.0174321	0	0.0183377	0	0	0	0	0	0	0	0.0105797
	300	84-2-1	M	36	UL3	DB	9	1	1	1		6567336	172713	45125	1253	173968	3292591	360566	45904	0	105758	0	0	1846	0	0	3308	0	64132		1	0.0262988	0.00687113	0.000190793	0.0264899	0.501359	0.0549029	0.00698974	0	0.0161036	0	0	0.000281088	0	0	0.000503705	0	0.0097653
	301	84-3-1	M	36	UR1	MB	8	1	1	1		19766146	1513241	972419	10417	312925	8546008	1100010	49705	10501	674637	0	0	16246	29316	0	0	0	551327		1	0.0765572	0.0491962	0.000527012	0.0158314	0.432356	0.0556512	0.00251465	0.000531262	0.0341309	0	0	0.00082191	0.00148314	0	0	0	0.0278925
	302	84-4-1	M	36	UR3	MB	7	1	1	1		25113113	4171513	1788501	4944	878421	10221700	1289405	772229	21889	45169	0	0	9508	102880	0	10720	38104	244435		1	0.166109	0.0712178	0.000196869	0.0349786	0.407026	0.0513439	0.03075	0.000871616	0.00179862	0	0	0.000378607	0.00409666	0	0.000426869	0.00151729	0.00973336
	303	85-1-1	M	69	UR1	MP	4	0	1	1		1998517	2695	2617	8767	5744	339070	59005	0	4232	9145	9921	0	8942	1005	55567	4497	95449	39606		1	0.0013485	0.00130947	0.00438675	0.00287413	0.169661	0.0295244	0	0.00211757	0.00457589	0.00496418	0	0.00447432	0.000502873	0.0278041	0.00225017	0.0477599	0.0198177
	304	85-2-1	M	69	UL1	MP	7	1	1	1		115613317	2569969	2223898	9646456	4001623	12834834	40288957	0	0	130779	1246947	0	0	30042	0	54874	0	59453		1	0.022229	0.0192357	0.0834372	0.0346121	0.111015	0.34848	0	0	0.00113118	0.0107855	0	0	0.000259849	0	0.000474634	0	0.00051424
	305	86-1-1	F	40	UR3	MB	5	1	1	1		5030579	322817	90514	56736	197425	307415	1365790	13422	0	86979	0	0	10597	0	55628	0	0	91997		1	0.0641709	0.0179928	0.0112782	0.039245	0.0611093	0.271498	0.00266808	0	0.0172901	0	0	0.00210652	0	0.011058	0	0	0.0182876
	306	86-2-1	F	40	LL6	MB	9	1	1	1		159302069	7008237	715530	1872876	1847039	7115412	9008871	935591	0	977279	124244	180350	292416	0	0	0	239132	880047		1	0.0439934	0.00449166	0.0117568	0.0115946	0.0446662	0.0565521	0.00587306	0	0.00613475	0.000779927	0.00113213	0.00183561	0	0	0	0.00150112	0.00552439
	307	87-1-1	M	68	LL7	DL	4	0	1	1		1054077	0	609	338	0	7050	12981	0	0	0	0	0	68414	24639	21161	13208	25986	152013		1	0	0.000577757	0.00032066	0	0.00668832	0.012315	0	0	0	0	0	0.0649042	0.023375	0.0200754	0.0125304	0.0246528	0.144214
	308	87-2-1	M	68	LR7	DL	7	1	2	1		12684499	2082337	127677	281515	303718	451031	1292806	184592	7768	0	0	0	318141	0	332146	11009	338518	610305		1	0.164164	0.0100656	0.0221936	0.023944	0.0355577	0.10192	0.0145526	0.000612401	0	0	0	0.0250811	0	0.0261852	0.00086791	0.0266875	0.0481142
	310	88-1-1	F	67	UL5	MB	4	0	1	1		40226332	2466887	1215973	2939924	2954091	2346913	11474645	1906013	20885	1023385	438614	186258	2579053	36907	742014	105142	478430	4121772		1	0.0613252	0.0302283	0.0730846	0.0734367	0.0583427	0.285252	0.0473822	0.000519187	0.0254407	0.0109037	0.00463025	0.0641136	0.000917484	0.018446	0.00261376	0.0118935	0.102465
	311	88-2-1	F	67	UR5	MB	6	0	1	1		20017369	4429947	894929	1311884	4798810	740483	5694074	0	0	0	17892	0	297483	0	0	18230	0	883462		1	0.221305	0.0447076	0.0655373	0.239732	0.036992	0.284457	0	0	0	0.000893824	0	0.0148612	0	0	0.000910709	0	0.0441348
	314	89-1-1	F	24	UL4	MB	4	0	1	1		134568	7095	3587	4588	2187	717	5639	635	0	0	220	0	343	0	0	0	0	3060		1	0.0527243	0.0266557	0.0340943	0.016252	0.00532816	0.0419045	0.0047188	0	0	0.00163486	0	0.0025489	0	0	0	0	0.0227394
	317	89-4-1	F	24	UL1	MB	12	1	2	2		10716913	1681061	189827	238135	253449	47638	338597	197400	0	0	5097	0	0	2288	0	0	15019	25596		1	0.156861	0.0177128	0.0222205	0.0236494	0.00444512	0.0315946	0.0184195	0	0	0.000475603	0	0	0.000213494	0	0	0.00140143	0.00238837
	318	90-1-1	F	20	LR3	MB	5	1	2	1		19887987	492043	1456576	2919646	1191546	1984711	866110	48253	11371	0	9081	0	44673	0	0	5629	0	43336		1	0.0247407	0.073239	0.146805	0.0599129	0.0997945	0.0435494	0.00242624	0.000571752	0	0.000456607	0	0.00224623	0	0	0.000283035	0	0.002179
	319	90-2-1	F	20	LR1	MB	8	1	2	1		24756248	355626	882983	1696146	1427058	6382005	1434653	40386	0	155220	19824	0	11037	0	0	0	28461	84221		1	0.0143651	0.0356671	0.0685139	0.0576444	0.257794	0.0579511	0.00163135	0	0.00626993	0.000800768	0	0.000445827	0	0	0	0.00114965	0.00340201
	320	91-1-1	F	47	UL6	MB	4	0	1	1		27929157	0	992005	1537696	1218462	14188799	1463515	177491	0	0	0	0	6832	0	0	14205	46028	27645		1	0	0.0355186	0.055057	0.0436269	0.508028	0.052401	0.00635504	0	0	0	0	0.000244619	0	0	0.000508608	0.00164803	0.000989826
	321	91-2-1	F	47	LR5	MB	6	1	2	1		20812205	530374	1331454	979778	1332925	4346364	520348	85189	25887	0	0	13755	30377	0	0	11937	0	81523		1	0.0254838	0.0639747	0.0470771	0.0640454	0.208837	0.0250021	0.00409322	0.00124384	0	0	0.00066091	0.00145958	0	0	0.000573558	0	0.00391708
[truncated: 18 more columns]

## Sheet: beforeSRP
						MIN	2	0	0	0		306622	0	0	0	0	0	429	0	0	0	0	0	0	0	0	0	0	4594		1	0	0	0	0	0	0.000994195	0	0	0	0	0	0	0	0	0	0	0.000301563
						MAX	12	1	2	2		1325938273	104634724	33626515	38743635	49730445	158257725	69776379	31554267	371792	26678620	438614	641530	2579053	2345648	5888817	709244	8811057	15553497		1	0.221305	0.247812	0.17661	0.239732	0.481809	0.323385	0.0506202	0.00366737	0.145268	0.0156486	0.0268557	0.343764	0.34548	0.0925857	0.116735	0.167216	0.416118
						AVG	5.95161	0.629032	1.35484	1.20968		5.88572e+07	3.1229e+06	2.09515e+06	1.95497e+06	2.20845e+06	6.80521e+06	3.42706e+06	580448	9741.23	710011	18117.1	42364.4	184456	77061.7	135129	33254.2	352301	990111		1	0.0386593	0.0522875	0.0281184	0.0453843	0.0854758	0.0749426	0.00367851	0.00027389	0.00946313	0.000754832	0.00245892	0.0198703	0.00997301	0.00454317	0.00582802	0.0113257	0.0645382
						S.E.	0.292175	0.06185	0.0730711	0.0695118		2.54106e+07	1.76403e+06	716792	853248	929002	3.50495e+06	1.56792e+06	508833	6045.58	437716	9580.82	14985	60600.3	39485.9	96016.4	12035.9	182789	326473		0	0.00654898	0.00776807	0.00499814	0.00601082	0.0121082	0.010442	0.00127119	9.39401e-05	0.00278988	0.000350765	0.000745413	0.00615528	0.00572362	0.00194269	0.0020095	0.00387892	0.0104249
						MEDIAN	5.5	1	1	1		1.05084e+07	152447	410247	112386	443942	735208	601291	0	0	0	0	0	31859.5	598	0	7323.5	0	194194		1	0.0179001	0.0349387	0.0137495	0.0342158	0.0568974	0.0370265	0	0	0	0	0	0.0030728	0.000232964	0	0.000926595	0	0.02585
						S.D.	2.28196	0.483064	0.570703	0.542904		1.98463e+08	1.37775e+07	5.59832e+06	6.66408e+06	7.25574e+06	2.73745e+07	1.22459e+07	3.97412e+06	47217.5	3.41867e+06	74828.6	117036	473304	308395	749912	94003.4	1.42763e+06	2.54983e+06		0	0.0511491	0.0606706	0.0390367	0.046946	0.0945683	0.0815547	0.00992832	0.000733695	0.0217897	0.00273956	0.00582186	0.0480743	0.0447029	0.0151729	0.0156947	0.0302953	0.0814209
								BOP (%)	-	0.629032
								GI	0	3
									1	34
									2	25
								plI	0	4
									1	41
									2	17
	N=	62										genome copy number /paper point																			genome (%)
	GCF No.	Sample ID	Gender	Age	Teeth	BDMLP	PD	BOP	GI	PlI		Total bacteria	Porphyromonas gingivalis	Tannerella forsythia	Treponema denticola	Campylobacter rectus	Fusobacterium nucleatum subsp. animalis	Fusobacterium nucleatum subsp. nucleatum	Prevotella intermedia	Prevotella nigrescens	Streptococcus constellatus	Aggregatibacter actinomycetemcomitans	Capnocytophaga gingivalis	Streptococcus gordonii	Streptococcus intermedius	Veillonella parvula	Actinomyces viscosus	Selenomonas noxia	streptococci		Total bacteria	Porphyromonas gingivalis	Tannerella forsythia	Treponema denticola	Campylobacter rectus	Fusobacterium nucleatum subsp. animalis	Fusobacterium nucleatum subsp. nucleatum	Prevotella intermedia	Prevotella nigrescens	Streptococcus constellatus	Aggregatibacter actinomycetemcomitans	Capnocytophaga gingivalis	Streptococcus gordonii	Streptococcus intermedius	Veillonella parvula	Actinomyces viscosus	Selenomonas noxia	streptococci
	3	2-1-1	F	66	UL6	MP	5	1	2	1		2419043	132917	16496	50206	44489	311861	83793	75766	0	42268	0	3848	80918	32499	0	18007	0	194708		1	0.0549461	0.00681923	0.0207545	0.0183912	0.128919	0.0346389	0.0313207	0	0.017473	0	0.00159071	0.0334504	0.0134347	0	0.00744385	0	0.0804897
	4	2-2-1	F	66	UR7	P	9	1	2	1		27238279	4809184	674323	4252534	2096641	6196117	2859552	293116	0	3956860	0	0	0	7042	0	7782	0	2372090		1	0.17656	0.0247564	0.156123	0.0769741	0.227478	0.104983	0.0107612	0	0.145268	0	0	0	0.000258533	0	0.000285701	0	0.0870866
	5	3-1-1	M	59	UR7	MP	4	1	2	2		13277577	0	1984825	898480	985598	1129798	606171	37642	0	0	0	37396	37229	0	0	8219	147836	145494		1	0	0.149487	0.067669	0.0742303	0.0850907	0.0456537	0.00283501	0	0	0	0.00281648	0.0028039	0	0	0.000619014	0.0111343	0.0109579
	6	3-2-1	M	59	UL7	MP	12	1	2	1		11802936	0	2463475	342633	1090256	417788	1759240	43321	0	56503	0	0	5159	0	0	15386	0	52565		1	0	0.208717	0.0290295	0.0923716	0.035397	0.149051	0.00367036	0	0.0047872	0	0	0.000437095	0	0	0.00130357	0	0.00445355
	13	7-1-1	M	60	UR6	MP	4	0	1	1		1941257	44482	49390	16579	13709	67750	42478	0	0	10559	1982	41809	2102	0	0	10296	80134	47033		1	0.022914	0.0254423	0.00854034	0.00706192	0.0349001	0.0218817	0	0	0.00543926	0.00102099	0.0215371	0.0010828	0	0	0.00530378	0.0412794	0.0242281
	14	7-2-1	M	60	UL7	B	7	1	2	1		15233941	174383	650216	97827	1412428	729933	2913161	22790	0	0	0	0	0	0	0	0	0	4594		1	0.011447	0.0426821	0.00642165	0.0927159	0.0479149	0.191228	0.001496	0	0	0	0	0	0	0	0	0	0.000301563
	17	9-1-1	F	42	LL4	MB	5	1	2	1		13898035	0	786726	274323	190536	1854313	1831401	0	0	0	0	0	19517	28601	0	143156	0	57008		1	0	0.056607	0.0197383	0.0137096	0.133423	0.131774	0	0	0	0	0	0.0014043	0.00205792	0	0.0103004	0	0.00410187
	18	9-2-1	F	42	LR3	MB	9	1	2	1		24424930	0	2050224	295181	764448	5269737	2600574	0	0	0	0	0	0	0	0	0	0	14656		1	0	0.0839398	0.0120852	0.0312979	0.215752	0.106472	0	0	0	0	0	0	0	0	0	0	0.000600043
	19	10-1-1	M	29	UR4	MB	5	1	2	1		313603	0	560	0	966	1740	686	0	0	0	0	0	2642	0	0	7814	0	10167		1	0	0.0017857	0	0.00308033	0.00554842	0.00218748	0	0	0	0	0	0.00842466	0	0	0.0249169	0	0.03242
	20	10-2-1	M	29	UR2	MB	9	1	2	2		16475612	523326	1596660	226731	1530854	7107428	823595	111210	0	0	144887	0	0	0	0	21909	0	5854		1	0.0317637	0.0969105	0.0137616	0.0929164	0.431391	0.0499887	0.00674998	0	0	0.00879403	0	0	0	0	0.00132978	0	0.000355313
	21	11-1-1	F	46	UL5	MB	4	0	1	2		1944045	4934	2037	4363	12462	35600	10854	0	0	0	0	0	134645	3061	0	3223	0	374739		1	0.00253801	0.00104782	0.00224429	0.00641035	0.0183123	0.0055832	0	0	0	0	0	0.0692602	0.00157455	0	0.00165788	0	0.192763
	22	11-2-1	F	46	UR6	MB	11	1	2	2		1325938273	104634724	23019234	38743635	49730445	158257725	69776379	31554267	0	3569974	0	0	511329	2345648	0	0	8811057	10547238		1	0.0789137	0.0173607	0.0292198	0.0375059	0.119355	0.0526242	0.0237977	0	0.00269241	0	0	0.000385636	0.00176905	0	0	0.00664515	0.00795455
	23	12-1-1	F	23	UL1	DB	5	0	1	1		4476542	0	295810	1514	490363	121270	1070107	0	0	0	1053	1950	4447	0	0	5935	0	22244		1	0	0.06608	0.000338207	0.109541	0.0270901	0.239048	0	0	0	0.000235226	0.000435604	0.000993401	0	0	0.0013258	0	0.00496901
	24	12-2-1	F	23	UL6	MB	9	0	2	1		23414117	2802120	5802288	381613	1154700	2742924	897272	5599	0	0	366397	0	0	0	0	0	0	86651		1	0.119677	0.247812	0.0162984	0.0493164	0.117148	0.0383218	0.000239129	0	0	0.0156486	0	0	0	0	0	0	0.0037008
	25	13-1-1	M	28	UL4	MB	4	0	1	1		431505	0	338	248	0	0	429	0	0	0	0	779	148336	666	0	2869	0	179557		1	0	0.000783305	0.000574733	0	0	0.000994195	0	0	0	0	0.00180531	0.343764	0.00154344	0	0.00664882	0	0.416118
	26	13-2-1	M	28	UL2	MB	7	1	2	1		18486441	0	2288755	581400	1081636	1042474	2776032	37412	0	0	139752	0	16965	3834	0	16673	0	37924		1	0	0.123807	0.0314501	0.0585097	0.0563913	0.150166	0.00202375	0	0	0.0075597	0	0.0009177	0.000207395	0	0.000901904	0	0.00205145
	27	14-1-1	F	47	UR6	MB	4	0	1	1		482405	0	4513	1354	6510	7530	3226	0	0	11681	152	0	7745	530	0	1175	0	71389		1	0	0.00935521	0.00280677	0.0134949	0.0156093	0.00668733	0	0	0.0242141	0.000315088	0	0.016055	0.00109866	0	0.00243571	0	0.147986
	28	14-2-1	F	47	LL6	MB	7	1	2	2		524553451	20496453	4895774	27556226	16399968	21961660	3864522	464680	371792	3269566	0	443053	1539659	261090	5888817	168028	7194396	8055285		1	0.0390741	0.00933322	0.0525327	0.0312646	0.0418673	0.00736726	0.000885858	0.000708778	0.00623305	0	0.000844629	0.00293518	0.000497738	0.0112263	0.000320326	0.0137153	0.0153565
	29	15-1-1	M	39	UR5	DB	5	0	1	1		9374041	1177599	1560494	275871	223769	895702	118152	0	0	0	0	0	62048	0	13783	0	0	200003		1	0.125623	0.16647	0.0294293	0.0238711	0.0955513	0.0126042	0	0	0	0	0	0.00661913	0	0.00147034	0	0	0.0213358
	30	15-2-1	M	39	LL7	DB	8	0	1	1		19983643	1403957	1024613	2270225	171270	2355348	306695	0	13310	0	0	0	5641	0	44014	0	0	118456		1	0.0702553	0.0512726	0.113604	0.00857051	0.117864	0.0153473	0	0.000666045	0	0	0	0.000282281	0	0.0022025	0	0	0.00592765
	31	16-1-1	F	65	UR1	MB	4	1	1	0		5146630	559663	143868	70701	808805	497040	847237	4080	0	0	0	0	3223	63803	0	4123	0	68140		1	0.108744	0.0279538	0.0137373	0.157152	0.0965758	0.16462	0.000792752	0	0	0	0	0.000626235	0.012397	0	0.000801107	0	0.0132397
	32	16-2-1	F	65	UL2	DB	8	1	2	1		10665524	1258922	263107	234422	1378266	988160	161519	6763	0	13518	0	0	0	45166	0	0	0	39742		1	0.118037	0.0246689	0.0219794	0.129226	0.0926499	0.015144	0.000634099	0	0.00126745	0	0	0	0.00423477	0	0	0	0.00372621
	35	18-1-1	M	63	UR4	DB	4	0	1	2		5365519	352688	198756	17857	291944	439022	153829	0	0	0	0	4572	61734	19462	0	25946	115796	593171		1	0.0657323	0.0370432	0.0033281	0.0544111	0.0818228	0.0286699	0	0	0	0	0.000852108	0.0115057	0.00362724	0	0.00483569	0.0215815	0.110552
	36	18-2-1	M	63	UL4	DB	8	1	2	2		13821450	858295	398771	467554	513242	341046	455573	46502	12799	0	0	11732	21024	0	0	13117	445117	170038		1	0.0620988	0.0288516	0.0338281	0.0371337	0.0246751	0.0329613	0.00336448	0.000926024	0	0	0.000848826	0.00152111	0	0	0.000949032	0.0322048	0.0123025
	37	19-1-1	F	45	UL3	MB	4	0	1	1		6878978	491739	249942	627253	593040	1142663	167517	0	0	0	0	0	32530	0	0	2299	0	189313		1	0.0714843	0.0363342	0.091184	0.0862105	0.166109	0.024352	0	0	0	0	0	0.0047289	0	0	0.000334207	0	0.0275205
	38	19-2-1	F	45	UR3	MB	8	1	2	2		4610790	171977	130719	126022	76496	405694	1109101	3821	0	0	592	0	2626	0	0	0	0	14070		1	0.0372988	0.0283507	0.027332	0.0165906	0.087988	0.240545	0.000828708	0	0	0.000128394	0	0.000569534	0	0	0	0	0.00305154
	39	20-1-1	F	38	UR5	MB	4	0	1	1		5126783	0	1943	1685	3639	32596	5817	0	8371	0	0	9608	80661	22439	230760	83821	365617	532441		1	0	0.00037899	0.000328666	0.000709802	0.00635798	0.00113463	0	0.0016328	0	0	0.00187408	0.0157333	0.00437682	0.0450107	0.0163496	0.0713151	0.103855
	40	20-2-1	F	38	UR4	MB	7	1	2	2		70630723	6704503	2369176	4015641	4429566	4054457	1428371	58459	30347	176995	0	0	384770	22058	0	90308	0	1205492		1	0.0949233	0.0335431	0.056854	0.0627144	0.0574036	0.0202231	0.000827671	0.000429657	0.00250592	0	0	0.00544763	0.0003123	0	0.00127859	0	0.0170675
	69	21-1-1	M	59	UL6	MP	3	0	1	1		20835587	10877	4853	2875	0	6729195	1268151	47684	14153	169238	0	0	1071989	0	87684	709244	21233	3233828		1	0.00052204	0.000232919	0.000137985	0	0.322966	0.0608647	0.00228858	0.000679271	0.00812255	0	0	0.0514499	0	0.00420838	0.03404	0.00101907	0.155207
	70	21-2-1	M	59	UR6	MP	8	1	1	1		13612348	550716	1722666	579835	146350	6558557	1026210	0	0	0	0	0	68904	0	0	0	0	373956		1	0.0404571	0.126552	0.0425963	0.0107513	0.481809	0.0753882	0	0	0	0	0	0.00506187	0	0	0	0	0.0274718
	71	22-1-1	M	59	LR3	MB	3	0	1	0		339250	0	408	279	4446	1754	920	0	0	0	0	1012	7793	0	0	1281	5092	70132		1	0	0.00120265	0.000822402	0.0131054	0.00517023	0.00271186	0	0	0	0	0.00298305	0.0229713	0	0	0.00377598	0.0150096	0.206727
	72	22-2-1	M	59	LL5	MB	6	1	2	1		26678125	0	2757843	970162	1454846	4780180	2029112	141207	0	368276	0	0	0	0	0	9090	67865	193681		1	0	0.103375	0.0363654	0.0545333	0.17918	0.076059	0.00529299	0	0.0138044	0	0	0	0	0	0.000340729	0.00254384	0.00725992
	73	23-1-1	M	68	UR6	MP	3	0	1	2		14323030	0	11189	2563	18549	620881	805070	0	28900	525284	0	338324	155661	53608	0	0	30899	1711912		1	0	0.000781189	0.000178943	0.00129505	0.0433484	0.0562081	0	0.00201773	0.0366741	0	0.023621	0.0108679	0.00374278	0	0	0.00215729	0.119522
	74	23-2-1	M	68	UR7	DB	8	1	1	2		12763205	66012	152246	1863	31267	1955229	1462766	0	0	651509	0	342765	60350	51783	0	3315	38191	1026347		1	0.00517206	0.0119285	0.000145966	0.00244978	0.153193	0.114608	0	0	0.0510459	0	0.0268557	0.00472844	0.00405721	0	0.000259731	0.00299227	0.0804145
	75	24-1-1	M	29	UR6	MB	4	0	1	0		1915700	0	0	0	7786	13060	68450	0	0	0	935	7089	94603	126378	9514	14649	0	366193		1	0	0	0	0.00406431	0.00681735	0.0357311	0	0	0	0.000488072	0.00370048	0.049383	0.0659696	0.00496633	0.00764681	0	0.191154
	76	24-2-1	M	29	UR7	MB	9	1	1	1		508352685	997996	20545658	1676132	1041285	14020060	3835707	166219	0	26678620	0	641530	2214491	0	0	0	0	15553497		1	0.0019632	0.0404161	0.00329718	0.00204835	0.0275794	0.00754537	0.000326976	0	0.0524805	0	0.00126198	0.00435621	0	0	0	0	0.0305959
	83	28-1-1	M	46	UR5	MB	4	1	2	2		11322242	512301	1738438	954385	450792	818630	1569644	6192	0	174850	1908	7477	31189	49496	0	10671	0	250374		1	0.0452473	0.153542	0.0842929	0.0398147	0.0723028	0.138634	0.000546888	0	0.0154431	0.000168518	0.000660382	0.00275467	0.00437157	0	0.000942481	0	0.0221135
	84	28-2-1	M	46	UR3	DB	6	1	2	1		9705832	610305	855113	968951	498468	328156	185505	16187	0	73114	0	4365	24527	0	0	6865	0	86875		1	0.0628802	0.088103	0.0998318	0.0513576	0.0338102	0.0191127	0.00166776	0	0.007533	0	0.00044973	0.00252704	0	0	0.000707307	0	0.0089508
	85	29-1-1	F	42	LL2	DB	3	0	1	1		577751	0	562	0	1370	2051	3243	0	0	0	0	975	52147	755	0	67444	0	67397		1	0	0.000972737	0	0.00237126	0.00354997	0.00561314	0	0	0	0	0.00168758	0.0902586	0.00130679	0	0.116735	0	0.116654
	86	29-2-1	F	42	LR2	DB	6	1	2	1		590642747	29763711	33626515	25831943	27006942	152687930	69752057	0	0	1397172	0	0	132824	0	0	0	0	981350		1	0.0503921	0.0569321	0.0437353	0.0457247	0.258511	0.118095	0	0	0.00236551	0	0	0.00022488	0	0	0	0	0.0016615
	87	30-1-1	F	52	UR4	MB	4	1	1	1		4648767	120311	205149	98750	104137	245653	596411	16313	0	0	0	0	148834	5364	0	36476	0	269981		1	0.0258802	0.0441298	0.0212422	0.022401	0.0528426	0.128294	0.0035091	0	0	0	0	0.0320158	0.00115385	0	0.00784638	0	0.0580758
	88	30-2-1	F	52	UR2	DB	6	1	2	2		10079106	224884	391363	271202	405699	908592	1120573	510206	0	0	1104	0	8683	3304	0	6630	334813	56787		1	0.0223119	0.0388291	0.0269073	0.0402515	0.0901461	0.111178	0.0506202	0	0	0.000109534	0	0.000861485	0.000327807	0	0.000657796	0.0332185	0.00563413
	153	33-1-1	F	23	UR7	P	4	0	1	1		27621456	721840	2343407	3845	2480165	2518294	1601665	0	0	0	3231	28291	61490	0	40410	11980	21419	348710		1	0.0261333	0.0848401	0.000139203	0.0897912	0.0911717	0.0579863	0	0	0	0.000116974	0.00102424	0.00222617	0	0.00146299	0.000433721	0.000775448	0.0126246
	154	33-2-1	F	23	UL6	P	9	1	1	2		9512470	17368	2606	4132	4348	18072	37637	0	0	0	0	0	14426	3264	0	0	0	116054		1	0.00182581	0.000273956	0.000434377	0.000457084	0.00189982	0.0039566	0	0	0	0	0	0.00151654	0.000343129	0	0	0	0.0122002
	159	35-1-1	F	41	LR6	MB	4	0	0	1		4631452	13226	4593	1912	14376	78584	407152	0	0	0	1197	10790	350951	166350	0	5041	17899	911668		1	0.00285569	0.000991698	0.000412829	0.00310399	0.0169675	0.0879102	0	0	0	0.00025845	0.00232972	0.0757756	0.0359175	0	0.00108843	0.00386466	0.196843
	160	35-2-1	F	41	LR7	DB	11	1	1	1		7649783	1540187	1414425	893809	437093	148116	266549	16589	0	0	0	0	0	0	0	0	0	8806		1	0.201337	0.184897	0.116841	0.057138	0.0193621	0.034844	0.00216856	0	0	0	0	0	0	0	0	0	0.00115114
	164	37-1-1	F	44	LL7	MB	4	1	1	1		2916280	8893	5681	11207	27040	213962	93136	0	0	5964	0	5060	260105	1051	102219	41107	143353	348030		1	0.00304943	0.00194803	0.00384291	0.00927209	0.0733681	0.0319366	0	0	0.00204507	0	0.00173509	0.0891907	0.000360391	0.0350512	0.0140957	0.0491561	0.11934
	165	37-2-1	F	44	LR7	MB	6	1	1	1		6601162	491112	603396	200145	698475	252747	94042	0	0	13300	0	7080	82655	0	0	5603	0	733913		1	0.0743978	0.0914075	0.0303197	0.105811	0.0382883	0.0142463	0	0	0.0020148	0	0.00107254	0.0125213	0	0	0.00084879	0	0.111179
	166	38-1-1	F	38	UL6	DB	5	1	1	1		14671286	1155365	3346524	17033	1327679	1113898	3531375	0	0	0	0	0	6498	77186	0	0	0	87678		1	0.0787501	0.2281	0.00116098	0.0904951	0.0759237	0.2407	0	0	0	0	0	0.000442906	0.00526102	0	0	0	0.00597616
	167	38-2-1	F	38	UR6	DB	9	1	1	1		18860410	689704	1226008	12638	745684	1196384	1476691	0	36825	908630	0	0	8526	0	0	9670	0	548615		1	0.0365689	0.0650043	0.000670081	0.039537	0.0634336	0.0782958	0	0.0019525	0.0481766	0	0	0.000452058	0	0	0.000512714	0	0.0290882
	170	40-1-1	F	59	LL7	B	4	0	0	1		5319882	0	1119	1121	0	272599	1720372	0	0	0	0	9576	236818	316346	48643	104652	0	461772		1	0	0.000210343	0.000210719	0	0.0512416	0.323385	0	0	0	0	0.00180004	0.0445156	0.0594649	0.00914362	0.0196719	0	0.0868012
	171	40-2-1	F	59	LL6	B	7	1	1	1		21786433	293863	811054	554846	2722460	1165909	4295068	0	9787	0	0	0	14352	5693	0	37164	0	33412		1	0.0134883	0.0372275	0.0254675	0.124961	0.0535154	0.197144	0	0.000449225	0	0	0	0.000658759	0.000261309	0	0.00170583	0	0.00153361
	269	59-1-1	F	63	RU6	DP	4	0	1	1		306622	0	439	2514	2259	2212	3317	0	0	4479	0	0	1302	0	0	4302	0	37835		1	0	0.00143173	0.00819902	0.00736738	0.00721409	0.0108179	0	0	0.0146076	0	0	0.00424627	0	0	0.0140303	0	0.123393
	270	59-2-1	F	63	RU7	DP	9	1	2	2		10351255	0	421723	1828135	1150545	247993	311090	0	0	127147	0	8886	19169	0	0	32762	374299	340878		1	0	0.0407412	0.17661	0.11115	0.0239578	0.0300534	0	0	0.0122832	0	0.000858447	0.00185185	0	0	0.00316503	0.0361598	0.0329311
	281	72-1-1	F	51	UL1	DB	2	0	0	0		13332230	442086	1117724	189320	910601	852134	467866	0	0	0	0	0	42802	0	0	0	41915	100095		1	0.0331592	0.0838362	0.0142002	0.0683007	0.0639153	0.0350929	0	0	0	0	0	0.00321042	0	0	0	0.00314389	0.00750775
	282	72-2-1	F	51	UL6	DP	6	1	2	1		22466927	1865101	1551124	37112	1849868	747245	206963	381759	0	374651	3563	223937	24836	32183	0	0	489023	344457		1	0.0830154	0.0690403	0.00165185	0.0823374	0.0332598	0.0092119	0.016992	0	0.0166757	0.000158589	0.00996741	0.00110545	0.00143246	0	0	0.0217664	0.0153317
	285	73-1-1	F	51	UR5	DB	5	1	1	1		399495	0	263	0	0	0	598	0	0	0	0	1476	34510	0	0	3245	0	94362		1	0	0.000658331	0	0	0	0.00149689	0	0	0	0	0.00369466	0.0863841	0	0	0.00812275	0	0.236203
	286	73-2-1	F	51	UR4	MB	7	1	1	1		1984518	25421	3357	7565	46940	186359	77277	13981	0	55518	0	0	6414	685611	0	25239	6610	529519		1	0.0128097	0.00169159	0.00381201	0.0236531	0.0939064	0.0389399	0.00704504	0	0.0279756	0	0	0.00323202	0.34548	0	0.0127179	0.00333078	0.266825
	291	74-1-1	F	73	UR3	MB	4	1	1	2		7002293	0	0	0	71858	283806	55975	0	25680	39253	0	141792	65114	216298	648312	110048	1050842	828900		1	0	0	0	0.0102621	0.0405304	0.00799381	0	0.00366737	0.00560574	0	0.0202494	0.00929895	0.0308896	0.0925857	0.015716	0.150071	0.118376
	292	74-2-1	F	73	UR4	MB	6	1	2	2		9334193	0	0	0	13713	1459844	265343	0	31107	322398	0	105163	92832	90350	521803	31822	1560825	854557		1	0	0	0	0.00146911	0.156397	0.028427	0	0.00333259	0.0345395	0	0.0112664	0.00994537	0.00967947	0.0559023	0.00340919	0.167216	0.0915512
	310	88-1-1	F	67	UL5	MB	4	0	1	1		40226332	2466887	1215973	2939924	2954091	2346913	11474645	1906013	20885	1023385	438614	186258	2579053	36907	742014	105142	478430	4121772		1	0.0613252	0.0302283	0.0730846	0.0734367	0.0583427	0.285252	0.0473822	0.000519187	0.0254407	0.0109037	0.00463025	0.0641136	0.000917484	0.018446	0.00261376	0.0118935	0.102465
	311	88-2-1	F	67	UR5	MB	6	0	1	1		20017369	4429947	894929	1311884	4798810	740483	5694074	0	0	0	17892	0	297483	0	0	18230	0	883462		1	0.221305	0.0447076	0.0655373	0.239732	0.036992	0.284457	0	0	0	0.000893824	0	0.0148612	0	0	0.000910709	0	0.0441348
[truncated: 18 more columns]

## Sheet: afterSRP
						MIN	2	0	0	0		2308	0	0	0	0	0	0	0	0	0	0	0	0	0	0	0	0	0		1	0	0	0	0	0	0	0	0	0	0	0	0	0	0	0	0	0
						MAX	9	1	2	2		37180708	1782528	702757	1610852	2745801	3484127	15140724	675843	114686	1166548	3722	103590	1071083	571115	1608790	678595	2161160	1146951		1	0.248096	0.0978823	0.25646	0.15235	0.228636	0.40722	0.0524894	0.0119471	0.236336	0.00316023	0.0270312	0.301789	0.114436	0.209778	0.191201	0.219979	0.381799
						AVG	3.48387	0.225806	0.322581	0.354839		2.85462e+06	51521.4	34706.9	47882.6	99408.3	158001	289492	18232.1	3218.89	41401.3	213.774	8051	60611.8	30142.1	38877.6	26643.9	99307.4	205467		1	0.0164615	0.00885689	0.0118571	0.0162849	0.0276699	0.0245665	0.00278686	0.000422322	0.00970021	0.00011397	0.00208101	0.0376957	0.0102223	0.00794882	0.0196218	0.0122389	0.116952
						S.E.	0.189271	0.0535338	0.0641183	0.0730711		681673	29767.7	13437	26651.7	46250.1	64731	243805	12135.4	1928.22	22616.9	87.953	2413.8	19932.1	11940.3	26145.8	11608.9	44067.8	34328.3		0	0.00552013	0.00254729	0.00504831	0.00369706	0.00608714	0.00735445	0.00110602	0.000208359	0.0046067	5.75652e-05	0.000585724	0.0072545	0.00282089	0.00390407	0.00407708	0.00456843	0.0113349
						MEDIAN	3	0	0	0		1.19011e+06	0	180	241.5	904	6651	5841.5	0	0	0	0	0	13725	0	0	4810.5	0	73258.5		1	0	0.000417598	0.000156828	0.000982628	0.00780536	0.0045142	0	0	0	0	0	0.0141935	0	0	0.0064026	0	0.0951065
						S.D.	1.47825	0.418112	0.50078	0.570703		5.32404e+06	232493	104946	208157	361225	505566	1.90418e+06	94780.7	15059.9	176644	686.935	18852.4	155675	93256.5	204206	90668.4	344181	268113		0	0.0431136	0.019895	0.0394286	0.028875	0.0475421	0.0574401	0.00863829	0.00162733	0.0359795	0.000449599	0.00457465	0.0566595	0.0220319	0.0304918	0.031843	0.0356806	0.0885285
								BOP (%)	-	0.225806
								GI	0	43
									1	18
									2	1
								plI	0	43
									1	16
									2	3
	N=	62										genome copy number /paper point																			genome (%)
	GCF No.	Sample ID	Gender	Age	Teeth	BDMLP	PD	BOP	GI	PlI		Total bacteria	Porphyromonas gingivalis	Tannerella forsythia	Treponema denticola	Campylobacter rectus	Fusobacterium nucleatum subsp. animalis	Fusobacterium nucleatum subsp. nucleatum	Prevotella intermedia	Prevotella nigrescens	Streptococcus constellatus	Aggregatibacter actinomycetemcomitans	Capnocytophaga gingivalis	Streptococcus gordonii	Streptococcus intermedius	Veillonella parvula	Actinomyces viscosus	Selenomonas noxia	streptococci		Total bacteria	Porphyromonas gingivalis	Tannerella forsythia	Treponema denticola	Campylobacter rectus	Fusobacterium nucleatum subsp. animalis	Fusobacterium nucleatum subsp. nucleatum	Prevotella intermedia	Prevotella nigrescens	Streptococcus constellatus	Aggregatibacter actinomycetemcomitans	Capnocytophaga gingivalis	Streptococcus gordonii	Streptococcus intermedius	Veillonella parvula	Actinomyces viscosus	Selenomonas noxia	streptococci
	41	2-1-2	F	66	UL6	MP	4	1	1	0		176875	14228	2984	8012	3167	20198	3543	2176	0	41802	0	0	0	0	0	0	0	23293		1	0.080441	0.0168707	0.0452975	0.0179053	0.114194	0.0200311	0.0123025	0	0.236336	0	0	0	0	0	0	0	0.131692
	42	2-2-2	F	66	UR7	P	9	1	1	0		686878	63606	23658	21754	31810	58886	36614	12879	0	83155	0	0	0	0	0	0	0	46502		1	0.0926016	0.0344428	0.0316708	0.046311	0.0857299	0.053305	0.0187501	0	0.121062	0	0	0	0	0	0	0	0.0677005
	43	3-1-2	M	59	UR7	MP	3	1	0	1		1860362	0	15372	12564	81161	22435	102488	0	2453	0	0	29575	62073	59442	0	5885	6994	131516		1	0	0.00826291	0.00675352	0.0436265	0.0120595	0.0550904	0	0.00131856	0	0	0.0158974	0.0333661	0.0319518	0	0.00316336	0.00375948	0.0706938
	44	3-2-2	M	59	UL7	MP	4	1	0	1		403187	0	1410	1120	0	6489	31260	0	0	0	0	4177	48112	2516	0	4568	0	76995		1	0	0.00349714	0.00277787	0	0.0160943	0.0775323	0	0	0	0	0.01036	0.119329	0.00624028	0	0.0113297	0	0.190966
	45	7-1-2	M	60	UR6	MP	3	0	0	0		231405	0	0	0	0	1590	11017	0	0	0	303	0	18669	26481	2985	5091	0	42702		1	0	0	0	0	0.00687107	0.0476092	0	0	0	0.00130939	0	0.0806767	0.114436	0.0128995	0.0220004	0	0.184534
	46	7-2-2	M	60	UL7	B	4	1	1	1		1278418	66191	116927	6983	0	39235	50843	17445	4115	0	0	1828	11478	1471	0	0	5367	46469		1	0.0517757	0.0914623	0.00546222	0	0.0306903	0.0397702	0.0136458	0.00321882	0	0	0.00142989	0.00897828	0.00115064	0	0	0.00419816	0.0363488
	47	9-1-2	F	42	LL4	MB	2	0	0	0		187269	0	208	0	0	0	0	0	0	0	0	469	4048	0	0	6391	0	32222		1	0	0.0011107	0	0	0	0	0	0	0	0	0.00250442	0.021616	0	0	0.0341274	0	0.172063
	48	9-2-2	F	42	LR3	MB	3	1	0	0		19456	0	0	0	0	0	0	0	0	0	0	0	251	0	0	1554	0	1423		1	0	0	0	0	0	0	0	0	0	0	0	0.0129009	0	0	0.0798725	0	0.0731394
	49	10-1-2	M	29	UR4	MB	2	0	0	0		14500	0	0	0	0	0	0	0	0	0	0	0	536	0	0	174	0	1066		1	0	0	0	0	0	0	0	0	0	0	0	0.0369655	0	0	0.012	0	0.0735172
	50	10-2-2	M	29	UR2	MB	3	0	0	0		381944	0	0	0	0	0	320	0	0	0	0	0	767	0	0	13529	0	5128		1	0	0	0	0	0	0.000837819	0	0	0	0	0	0.00200815	0	0	0.0354214	0	0.0134261
	51	11-1-2	F	46	UL5	MB	3	0	0	0		1997784	0	0	478	1944	13044	6085	0	0	0	0	3350	304823	3228	44383	132332	91539	293366		1	0	0	0.000239265	0.000973078	0.00652923	0.00304587	0	0	0	0	0.00167686	0.152581	0.00161579	0.0222161	0.0662394	0.0458203	0.146846
	52	11-2-2	F	46	UR6	MB	8	1	1	0		69121	0	138	216	0	2071	686	1020	0	0	0	0	775	0	0	895	0	4515		1	0	0.0019965	0.00312495	0	0.029962	0.00992462	0.0147567	0	0	0	0	0.0112122	0	0	0.0129483	0	0.0653202
	53	12-1-2	F	23	UL1	DB	3	0	0	1		2419296	0	5191	107417	74962	387428	115076	1963	0	0	0	19209	17159	14652	0	0	0	73746		1	0	0.00214567	0.0444001	0.030985	0.160141	0.0475659	0.000811393	0	0	0	0.00793991	0.00709256	0.00605631	0	0	0	0.0304824
	54	12-2-2	F	23	UL6	MB	2	0	0	2		3832243	0	1926	729	96483	82245	26951	0	0	0	0	103590	20035	1722	0	6483	22311	138311		1	0	0.000502578	0.000190228	0.0251766	0.0214613	0.0070327	0	0	0	0	0.0270312	0.00522801	0.000449345	0	0.0016917	0.00582192	0.0360914
	55	13-1-2	M	28	UL4	MB	3	0	0	0		29224	0	0	0	0	0	0	0	0	0	0	0	711	0	0	2885	0	2623		1	0	0	0	0	0	0	0	0	0	0	0	0.0243293	0	0	0.0987202	0	0.089755
	56	13-2-2	M	28	UL2	MB	3	0	0	1		154509	0	206	0	1489	1202	1023	0	0	0	0	0	4928	0	0	5478	9734	23023		1	0	0.00133326	0	0.00963698	0.00777948	0.00662097	0	0	0	0	0	0.0318946	0	0	0.0354542	0.0629996	0.149008
	57	14-1-2	F	47	UR6	MB	3	0	1	0		21063	0	0	0	0	0	0	0	0	0	0	0	264	0	0	145	0	3400		1	0	0	0	0	0	0	0	0	0	0	0	0.0125338	0	0	0.00688411	0	0.161421
	58	14-2-2	F	47	LL6	MB	3	0	1	1		9824370	0	0	1288	323651	275292	64249	0	26970	0	2889	31181	31206	53895	36358	2502	2161160	281124		1	0	0	0.000131103	0.0329437	0.0280213	0.00653976	0	0.00274521	0	0.000294065	0.00317384	0.00317639	0.00548585	0.0037008	0.000254673	0.219979	0.028615
	59	15-1-2	M	39	UR5	DB	3	0	0	0		1617328	0	0	0	2073	11808	3359	0	0	0	0	929	120253	7987	0	7704	0	398147		1	0	0	0	0.00128174	0.00730093	0.00207688	0	0	0	0	0.000574404	0.0743529	0.00493839	0	0.00476341	0	0.246176
	60	15-2-2	M	39	LL7	DB	6	0	0	2		9599455	0	78489	232939	526622	146756	78454	0	114686	0	2110	0	66242	0	19727	0	49256	473775		1	0	0.0081764	0.0242659	0.0548596	0.015288	0.00817276	0	0.0119471	0	0.000219804	0	0.0069006	0	0.00205501	0	0.00513112	0.0493544
	61	16-1-2	F	65	UR1	MB	2	0	0	0		12512	0	0	0	0	0	0	0	0	0	0	0	0	0	0	594	0	1595		1	0	0	0	0	0	0	0	0	0	0	0	0	0	0	0.0474744	0	0.127478
	62	16-2-2	F	65	UL2	DB	5	1	1	1		5072041	413095	124369	66770	358240	604984	277366	45414	0	0	0	0	0	130206	0	12705	7303	101359		1	0.0814455	0.0245205	0.0131643	0.0706303	0.119278	0.0546853	0.00895379	0	0	0	0	0	0.0256713	0	0.00250491	0.00143985	0.0199839
	63	18-1-2	M	63	UR4	DB	3	0	1	0		126851	0	0	0	0	0	0	0	0	0	0	0	0	0	0	8020	0	619		1	0	0	0	0	0	0	0	0	0	0	0	0	0	0	0.0632238	0	0.00487974
	64	18-2-2	M	63	UL4	DB	3	0	1	1		1196156	35292	57203	9025	56349	26301	194273	0	0	0	0	0	832	1170	0	19718	0	1738		1	0.0295045	0.0478224	0.007545	0.0471084	0.0219879	0.162414	0	0	0	0	0	0.000695561	0.000978133	0	0.0164845	0	0.00145299
	65	19-1-2	F	45	UL3	MB	2	0	0	0		5117	0	0	0	0	0	0	0	0	0	0	0	0	0	0	0	0	461		1	0	0	0	0	0	0	0	0	0	0	0	0	0	0	0	0	0.0900919
	66	19-2-2	F	45	UR3	MB	3	0	0	0		42372	0	125	0	319	0	0	0	0	0	0	0	1213	0	0	643	0	3041		1	0	0.00295006	0	0.00752856	0	0	0	0	0	0	0	0.0286274	0	0	0.0151751	0	0.0717691
	67	20-1-2	F	38	UR5	MB	3	0	0	0		705024	0	0	0	0	0	949	0	0	0	0	2101	91838	0	0	12519	0	140758		1	0	0	0	0	0	0.00134605	0	0	0	0	0.00298004	0.130262	0	0	0.0177568	0	0.19965
	68	20-2-2	F	38	UR4	MB	3	0	0	1		9702779	0	216064	163177	297223	274628	69710	343374	16326	24641	0	68171	42386	48672	145247	7327	368450	196841		1	0	0.0222683	0.0168176	0.0306328	0.0283041	0.00718454	0.0353892	0.00168261	0.00253958	0	0.00702593	0.00436844	0.00501629	0.0149696	0.000755144	0.0379737	0.0202871
	138	21-1-2	M	59	UL6	MP	3	0	1	0		2450258	0	815	0	0	42128	5598	0	0	0	0	0	36641	0	19407	144370	0	480739		1	0	0.000332618	0	0	0.0171933	0.00228466	0	0	0	0	0	0.0149539	0	0.00792039	0.0589203	0	0.196199
	139	21-2-2	M	59	UR6	MP	4	0	1	0		2699109	238391	264195	92963	69072	617114	76860	0	0	0	0	0	0	0	0	5053	0	7554		1	0.0883221	0.0978823	0.0344421	0.0255907	0.228636	0.0284761	0	0	0	0	0	0	0	0	0.0018721	0	0.0027987
	140	22-1-2	M	59	LR3	MB	3	0	0	0		2349133	0	1244	541	7727	21774	14154	0	0	0	0	33260	221634	4069	0	62169	11226	346848		1	0	0.000529557	0.000230298	0.0032893	0.00926895	0.0060252	0	0	0	0	0.0141584	0.0943471	0.00173213	0	0.0264647	0.00477878	0.147649
	141	22-2-2	M	59	LL5	MB	5	0	0	0		37180708	0	702757	179633	2745801	3484127	15140724	14007	0	1166548	0	62245	15972	0	0	32266	977055	731419		1	0	0.0189011	0.00483135	0.0738502	0.0937079	0.40722	0.000376728	0	0.0313751	0	0.00167412	0.000429578	0	0	0.000867816	0.0262785	0.019672
	142	23-1-2	M	68	UR6	MP	2	0	0	0		4865066	0	1004	733	0	5509	18989	0	0	0	0	11663	77096	0	0	16147	0	379042		1	0	0.000206369	0.000150666	0	0.00113236	0.00390313	0	0	0	0	0.0023973	0.0158469	0	0	0.00331897	0	0.077911
	143	23-2-2	M	68	UR7	DB	4	0	0	0		4242614	0	0	0	0	3640	11102	0	0	0	0	6793	433494	0	0	3619	0	491529		1	0	0	0	0	0.000857962	0.00261678	0	0	0	0	0.00160114	0.102176	0	0	0.000853012	0	0.115855
	144	24-1-2	M	29	UR6	MB	3	0	0	0		1177761	0	0	0	0	0	887	0	0	0	3722	0	35894	1397	0	5929	0	251755		1	0	0	0	0	0	0.000753124	0	0	0	0.00316023	0	0.0304765	0.00118615	0	0.00503413	0	0.213757
	145	24-2-2	M	29	UR7	MB	4	1	0	0		1184069	0	1277	409	2023	2172	2228	0	0	0	1252	882	19415	900	0	9606	0	248158		1	0	0.00107848	0.000345419	0.00170852	0.00183435	0.00188165	0	0	0	0.00105737	0.000744889	0.0163968	0.000760091	0	0.0081127	0	0.209581
	147	28-1-2	M	46	UR5	MB	2	0	0	0		87833	0	0	103	0	820	0	0	0	0	0	0	3095	0	0	3478	0	10746		1	0	0	0.00117268	0	0.0093359	0	0	0	0	0	0	0.0352373	0	0	0.0395979	0	0.122346
	148	28-2-2	M	46	UR3	DB	3	0	0	0		2308	0	0	0	0	0	0	0	0	0	0	0	0	0	0	0	0	0		1	0	0	0	0	0	0	0	0	0	0	0	0	0	0	0	0	0
	149	29-1-2	F	42	LL2	DB	3	0	0	0		16768	202	0	0	0	0	0	0	0	0	0	0	3533	0	0	348	0	3620		1	0.0120468	0	0	0	0	0	0	0	0	0	0	0.210699	0	0	0.0207538	0	0.215887
	150	29-2-2	F	42	LR2	DB	3	0	0	0		695557	0	402	0	105968	9186	29036	0	0	0	0	3312	60705	12449	0	14157	4263	69640		1	0	0.000577954	0	0.15235	0.0132067	0.041745	0	0	0	0	0.00476165	0.0872754	0.0178979	0	0.0203535	0.0061289	0.100121
	151	30-1-2	F	52	UR4	MB	3	0	1	0		3549118	0	905	940	8516	4806	3777	0	0	0	1733	4247	1071083	1777	16542	678595	0	923539		1	0	0.000254993	0.000264855	0.00239947	0.00135414	0.00106421	0	0	0	0.00048829	0.00119664	0.301789	0.000500688	0.00466088	0.191201	0	0.260216
	152	30-2-2	F	52	UR2	DB	3	0	1	0		8879626	9561	2206	1029	200292	37938	52928	0	0	0	0	17901	16397	0	57576	52577	1203963	370741		1	0.00107673	0.000248434	0.000115883	0.0225564	0.00427248	0.00596061	0	0	0	0	0.00201596	0.00184659	0	0.00648406	0.00592108	0.135587	0.0417519
	172	33-1-2	F	23	UR7	P	3	0	0	0		91935	0	154	0	0	0	0	0	0	0	0	0	1347	695	0	1242	0	4045		1	0	0.0016751	0	0	0	0	0	0	0	0	0	0.0146517	0.00755969	0	0.0135095	0	0.0439985
	173	33-2-2	F	23	UL6	P	3	0	0	0		243336	0	0	259	0	0	1173	0	0	0	0	0	6447	2142	0	0	0	49173		1	0	0	0.00106437	0	0	0.0048205	0	0	0	0	0	0.0264942	0.00880264	0	0	0	0.202079
	175	35-1-2	F	41	LR6	MB	2	0	0	0		37699	0	0	0	0	0	0	0	0	0	0	0	5340	0	0	1905	0	6310		1	0	0	0	0	0	0	0	0	0	0	0	0.141648	0	0	0.0505318	0	0.167378
	176	35-2-2	F	41	LR7	DB	3	0	0	0		14065	0	0	0	0	0	0	0	0	0	0	0	287	0	0	0	0	5370		1	0	0	0	0	0	0	0	0	0	0	0	0.0204053	0	0	0	0	0.381799
	199	37-1-2	F	44	LL7	MB	2	0	0	0		45459	0	105	0	0	356	189	0	0	0	0	0	1823	250	0	953	0	12397		1	0	0.00230977	0	0	0.00783123	0.00415759	0	0	0	0	0	0.0401021	0.00549946	0	0.0209639	0	0.272707
	200	37-2-2	F	44	LR7	MB	3	0	0	0		418546	907	464	224	0	14299	5442	0	0	0	0	0	27962	17069	0	5355	5949	72771		1	0.00216703	0.0011086	0.000535186	0	0.0341635	0.0130022	0	0	0	0	0	0.0668075	0.0407817	0	0.0127943	0.0142135	0.173866
	201	38-1-2	F	38	UL6	DB	3	0	0	0		2202389	49541	4385	1089	20296	62681	33740	0	0	0	639	13650	24786	95758	0	3065	7904	227016		1	0.0224942	0.00199102	0.000494463	0.00921545	0.0284605	0.0153197	0	0	0	0.000290139	0.00619782	0.0112541	0.0434791	0	0.00139167	0.00358883	0.103077
	202	38-2-2	F	38	UR6	DB	5	0	0	0		7679141	102660	142110	14009	37196	1406048	374140	0	15601	730851	0	0	6806	0	17537	0	227800	467442		1	0.0133687	0.018506	0.00182429	0.00484377	0.1831	0.0487216	0	0.00203161	0.0951735	0	0	0.000886297	0	0.00228372	0	0.0296648	0.0608717
	273	40-1-2	F	59	LL7	B	2	0	0	1		2455219	0	0	0	0	48841	13243	0	2556	0	606	0	252342	106084	190928	11264	29686	757222		1	0	0	0	0	0.0198927	0.00539382	0	0.00104105	0	0.000246821	0	0.102778	0.0432076	0.0777641	0.00458778	0.012091	0.308413
	274	40-2-2	F	59	LL6	B	5	1	0	1		2136536	276224	87443	4381	134142	181791	118440	12845	0	0	0	0	0	46001	0	0	0	31015		1	0.129286	0.0409275	0.00205052	0.0627848	0.0850868	0.0554355	0.00601207	0	0	0	0	0	0.0215306	0	0	0	0.0145165
	279	59-1-2	F	63	LU6	DP	5	1	1	1		6281098	0	282522	1610852	237880	176657	604745	0	0	347443	0	0	0	0	0	0	0	203416		1	0	0.0449797	0.25646	0.0378724	0.0281252	0.0962801	0	0	0.0553156	0	0	0	0	0	0	0	0.0323854
	280	59-2-2	F	63	LU7	DP	7	1	1	1		864530	0	3103	150721	10674	40749	33288	0	0	42247	0	728	7383	0	0	0	0	48719		1	0	0.00358923	0.174339	0.0123466	0.0471343	0.0385042	0	0	0.048867	0	0.000842076	0.0085399	0	0	0	0	0.0563532
	283	72-1-2	F	51	UL1	DB	2	0	0	0		3745333	101954	5107	3563	51684	18899	15760	2148	0	0	0	4964	358046	83223	37411	6167	65809	995173		1	0.0272216	0.00136356	0.000951317	0.0137996	0.00504601	0.0042079	0.000573514	0	0	0	0.00132538	0.0955979	0.0222205	0.0099887	0.00164658	0.0175709	0.26571
	284	72-2-2	F	51	UL6	DP	6	1	2	1		12875805	1782528	0	268555	634687	1447255	260154	675843	0	118209	0	43405	26590	571115	0	0	69289	586368		1	0.13844	0	0.0208573	0.049293	0.112401	0.0202049	0.0524894	0	0.00918071	0	0.00337105	0.00206511	0.0443557	0	0	0.00538133	0.0455403
	287	73-1-2	F	51	UR5	DB	4	0	1	1		1562970	3633	801	731	12863	27283	10067	0	0	0	0	1641	21468	2914	0	22503	0	239976		1	0.00232442	0.000512486	0.000467699	0.00822984	0.0174559	0.00644094	0	0	0	0	0.00104992	0.0137354	0.0018644	0	0.0143976	0	0.153538
	288	73-2-2	F	51	UR4	MB	7	1	1	1		146371	36314	6556	4763	15768	4156	13253	1277	0	0	0	0	0	2110	0	1420	0	3673		1	0.248096	0.0447903	0.0325406	0.107726	0.0283936	0.0905439	0.00872441	0	0	0	0	0	0.0144154	0	0.00970138	0	0.0250938
	293	74-1-2	F	73	UR3	MB	2	0	0	0		1308087	0	0	0	0	6813	2367	0	0	0	0	0	35971	125769	131177	108831	12481	164630		1	0	0	0	0	0.00520837	0.00180951	0	0	0	0	0	0.0274989	0.0961473	0.100282	0.0831986	0.00954141	0.125856
	294	74-2-2	F	73	UR4	MB	3	0	1	2		7668995	0	0	0	7609	152482	25137	0	16864	11987	0	0	37508	443649	1608790	179996	819521	506137		1	0	0	0	0.000992177	0.0198829	0.00327774	0	0.00219898	0.00156305	0	0	0.00489086	0.0578497	0.209778	0.0234706	0.106862	0.0659978
	312	88-1-2	F	67	UL5	MB	3	0	0	0		4619915	0	0	753	5621	3963	4980	0	0	0	0	28451	59779	0	82346	15220	0	1146951		1	0	0	0.00016299	0.00121669	0.000857808	0.00107794	0	0	0	0	0.00615834	0.0129394	0	0.0178241	0.00329443	0	0.248262
	313	88-2-2	F	67	UR5	MB	3	0	0	0		1541287	0	0	0	0	0	1866	0	0	0	0	1440	40488	0	0	8545	0	350037		1	0	0	0	0	0	0.00121068	0	0	0	0	0.000934284	0.026269	0	0	0.00554407	0	0.227107
[truncated: 18 more columns]

## Sheet: Real-timePCR
	GCF No.	Real-time PCR	Oral Care Chip	Real-time PCR	Oral Care Chip	Real-time PCR	Oral Care Chip	Real-time PCR	Oral Care Chip	Real-time PCR	Oral Care Chip	Real-time PCR	Oral Care Chip
		Total bacteria	Total bacteria	P. gingivalis	P. gingivalis	T. forsythensis	T. forsythensis	T. denticola	T. denticola	P. intermedia	P. intermedia	A. actinomycetemcomitans	A. actinomycetemcomitans
	3	305056	2.41856e+06	27931.1	132890	27818.2	16493	105810	50196.1	143586	75751	0	0
	4	4.24453e+06	2.72354e+07	4.69586e+06	4.80867e+06	1.30408e+06	674251	5.45141e+06	4.25208e+06	271576	293085	0	0
	5	3.16664e+06	1.32758e+07	0	0	1.32521e+06	1.98456e+06	749944	898359	46918.7	37636.6	0	0
	6	1.58189e+06	1.18013e+07	0	0	2.68368e+06	2.46313e+06	321128	342585	32083.8	43314.7	0	0
	13	266823	1.94085e+06	32594.7	44472.8	140325	49379.4	93455.5	16575.7	0	0	0	1981.34
	14	2.00692e+06	1.5232e+07	85293.5	174361	1.14365e+06	650132	491672	97814.4	15378.9	22786.7	0	0
	17	4.17231e+06	1.38962e+07	0	0	2.0211e+06	786622	2.3639e+06	274286	0	0	0	0
	19	207857	313515	2320.99	0	4845.05	560.274	0	0	770.432	0	829.151	0
	20	1.28672e+07	1.64735e+07	1.02138e+06	523260	6.29088e+06	1.59646e+06	934075	226702	176848	111196	407978	144869
	21	3.6086e+06	1.94364e+06	13551.1	4933.11	10624.3	2036.37	37095.2	4361.98	532.806	0	0	0
	22	9.79944e+06	1.326e+09	2.77442e+06	1.0464e+08	2.75345e+06	2.30203e+07	4.49651e+06	3.87454e+07	2.05529e+06	3.15557e+07	0	0
	23	1.07522e+06	4.47575e+06	0	0	990722	295757	89911.6	1514.03	0	0	0	1052.9
	24	7.08382e+06	2.34115e+07	1.19556e+06	2.8018e+06	6.52057e+06	5.80164e+06	1.70665e+06	381571	4727.1	5598.68	239184	366356
	25	126755	431389	0	0	3017.52	337.786	0	248.172	2968.58	0	0	0
	26	6.49039e+06	1.84842e+07	0	0	2.306e+06	2.28848e+06	1.19211e+06	581329	81300.3	37407.1	481432	139735
	27	385956	482277	1074.3	0	27682.7	4512.04	2373.25	1354.1	5193.76	0	0	152.143
	28	1.61703e+07	5.24558e+08	5.49584e+06	2.04966e+07	8.96957e+06	4.89582e+06	8.00881e+06	2.75565e+07	638860	464684	0	0
	30	6.02417e+06	1.99813e+07	3.04556e+06	1.40379e+06	3.82988e+06	1.02449e+06	4.49442e+06	2.26996e+06	1795.09	0	0	0
	31	2.06313e+06	5.14575e+06	1.3653e+06	559567	553567	143844	1.53803e+06	70689.2	15545.3	4079.68	0	0
	32	5.22314e+06	1.0664e+07	1.34255e+06	1.25874e+06	609459	263069	1.12093e+06	234388	20748.1	6762.44	0	0
	35	1.12369e+06	5.36461e+06	563444	352628	451156	198723	98083.4	17853.5	6108.68	0	0	0
	36	1.20819e+07	1.38196e+07	1.55325e+06	858181	1.49036e+06	398718	2.01167e+06	467491	321948	46495.6	0	0
	37	2.01933e+06	6.87787e+06	425391	491660	712157	249902	528479	627153	7416.36	0	0	0
	38	3.44517e+06	4.60998e+06	649242	171947	395278	130696	845892	126000	40734.6	3820.23	1045.41	591.879
	39	841477	5.1259e+06	2389.85	0	4423.11	1942.86	6909.62	1685	531.869	0	0	0
	40	1.33276e+07	7.06258e+07	5.98793e+06	6.70404e+06	7.19351e+06	2.36901e+06	1.36341e+07	4.01536e+06	363865	58454.9	0	0
	41	143142	176822	35820.1	14223.5	31853.3	2982.65	101655	8009.63	14132.5	2175.57	0	0
	42	389293	686705	102203	63590.5	216426	23651.9	150561	21748.8	39536.3	12875.5	0	0
	43	437453	1.85997e+06	0	0	54856.8	15368.7	97233.8	12561.1	428.779	0	0	0
	44	206018	403078	0	0	12138.9	1409.68	12270	1119.81	0	0	0	0
	45	124413	231337	0	0	0	0	0	0	0	0	0	303.292
	46	361200	1.27813e+06	87772.7	66176.5	347675	116901	201157	6981.76	65999.1	17441.1	0	0
	47	129764	187212	0	0	0	207.608	0	0	0	0	0	0
	48	46822.2	19447.9	0	0	0	73.2312	0	0	0	0	0	0
	49	22742.2	14494.3	0	0	0	64.4009	0	0	0	0	0	0
	50	97657.8	381840	0	0	0	0	0	0	784.289	0	0	0
	51	301000	1.99737e+06	257.761	0	0	0	0	477.945	2729.44	0	0	0
	52	60200	69097.4	924.327	0	2384.02	137.612	3822.64	215.531	31064.7	1019.53	0	0
	53	398658	2.41881e+06	0	0	0	5189.66	166488	107396	9882.32	1962.93	0	0
	54	627418	3.83154e+06	0	0	3655.7	1925.71	1653.72	729.251	0	0	0	0
	55	54848.9	29213.3	0	0	0	80.4981	0	0	0	0	0	0
	56	76253.3	154461	0	0	0	206.216	0	0	0	0	0	0
	57	48160	21054.6	0	0	0	83.9274	0	0	0	0	0	0
	58	1.31504e+06	9.82293e+06	925.237	0	0	0	1024.57	1287.69	0	0	0	2888.51
	59	441467	1.61698e+06	166.224	0	0	0	0	0	0	0	0	0
	60	2.45348e+06	9.59804e+06	133.278	0	211063	78477.5	880295	232904	0	0	0	2109.56
	61	21404.4	12506.8	0	0	0	0	0	0	0	0	0	0
	62	1.16788e+06	5.07117e+06	299575	413024	278910	124348	379545	66758.7	144550	45406.4	0	0
	63	104347	126811	0	0	0	0	0	0	0	0	0	0
	64	511031	1.19588e+06	80260.6	35284.1	553651	57190.3	87939.2	9023.14	1245.58	0	0	0
	65	16053.3	5114.39	0	0	0	0	0	0	0	0	0	0
	66	32106.7	42356.5	0	0	0	125.158	0	0	0	0	0	0
	67	189964	704848	0	0	0	0	0	0	350.67	0	0	0
	68	1.09832e+06	9.70135e+06	0	0	0	216032	380558	163153	246624	343323	0	0
	69	1.24037e+07	2.08332e+07	4680.35	10876	12577.3	4851.96	0	2874.29	172412	47678	0	0
	70	6.2471e+06	1.36105e+07	705893	550642	3.37865e+06	1.72244e+06	1.33895e+06	579757	0	0	0	0
	71	172377	339156	0	0	1854.35	408.133	0	279.397	1857.04	0	0	0
	72	9.83657e+06	2.66753e+07	0	0	7.15088e+06	2.75755e+06	6.28151e+06	970058	500126	141192	0	0
	74	4.75855e+06	1.27615e+07	148714	66002.8	668882	152225	0	1863.24	0	0	0	0
	75	1.24954e+06	1.9153e+06	509.044	0	3531.4	0	0	0	2040.68	0	0	934.965
	76	3.20505e+06	5.08357e+08	171526	998004	4.47583e+06	2.05458e+07	2.08328e+06	1.67615e+06	147813	166220	0	0
	83	5.26053e+06	1.13206e+07	1.39144e+06	512229	4.95753e+06	1.73819e+06	2.54896e+06	954250	28508.9	6191.27	0	1907.9
	84	1.10652e+07	9.70441e+06	3.55419e+06	610216	1.1979e+07	854987	6.64191e+06	968809	405593	16184.7	0	0
	85	432410	577603	5473.04	0	2466.18	561.558	0	0	0	0	0	0
	86	1.43031e+07	5.90651e+08	9.81478e+06	2.97641e+07	6.57388e+06	3.3627e+07	7.84623e+06	2.58323e+07	40695.5	0	0	0
	87	2.06797e+06	4.64795e+06	222839	120290	780880	205113	517204	98732.5	78006.9	16310.5	0	0
	88	2.05179e+06	1.00776e+07	244701	224852	1.50579e+06	391306	1.02342e+06	271163	764753	510132	0	1103.89
	138	1.11571e+06	2.44977e+06	225.181	0	0	814.595	0	0	0	0	0	0
	139	1.20801e+06	2.69858e+06	1.48561e+06	238344	1.94578e+06	264143	1.12114e+06	92944.2	0	0	0	0
	140	809356	2.34866e+06	0	0	2276.32	1243.94	0	540.716	1571.69	0	0	0
	141	5.55178e+06	3.71772e+07	0	0	1.84147e+06	702691	691662	179616	34436.9	14006.2	0	0
	142	2.34111e+06	4.86422e+06	251.578	0	0	1003.58	0	732.515	0	0	0	0
	143	2.01469e+06	4.24185e+06	502.267	0	0	0	0	0	0	0	0	0
	144	663538	1.17749e+06	0	0	0	0	0	0	0	0	0	3720.89
	145	512369	1.1838e+06	809.297	0	15243.5	1276.59	3491.1	409.057	593.236	0	0	1251.49
	147	96320	87804.1	0	0	0	0	0	102.773	1754.76	0	0	0
	148	5351.11	2306.75	0	0	0	0	0	0	0	0	0	0
	149	46822.2	16760.9	452.665	202.365	2143.07	90.2091	0	0	0	0	0	0
	150	464209	695383	115.858	0	0	402.234	0	0	0	0	0	0
	151	1.26286e+06	3.54846e+06	0	0	0	904.355	1605.61	939.761	0	0	0	1732.86
	152	2684920	8.87829e+06	16470.9	9559.92	15628.7	2205.68	1178.63	1029.23	6127.55	0	0	0
	153	3.86223e+06	2.76185e+07	755651	721763	2.4796e+06	2.34316e+06	2957.92	3844.3	0	0	8186.51	3230.55
	154	1.41626e+07	9.51107e+06	40305.7	17365.8	11308.8	2605.55	12472.1	4131.53	11963.5	0	2711.09	0
	159	1.73353e+06	4.63064e+06	15190.5	13223.5	23704.3	4592.01	10262.5	1911.88	384.094	0	0	1196.91
	160	3.95867e+06	7.64859e+06	4.0041e+06	1.53995e+06	4.40927e+06	1.4142e+06	2.35666e+06	893669	7192.48	16586.2	0	0
	164	1.37886e+06	2.91571e+06	4528.77	8890.89	18365.4	5680.16	53101	11204.7	0	0	0	0
	165	2.55283e+06	6.60009e+06	783147	491032	35472.8	603298	1.18115e+06	200113	0	0	0	0
	166	8.56843e+06	1.46694e+07	5.5908e+06	1.15521e+06	7.54259e+06	3.34609e+06	7.19494e+06	17030.7	0	0	0	0
	167	5.80262e+06	1.88581e+07	2.36503e+06	689621	5.04398e+06	1.22586e+06	3.09856e+06	12636.3	0	0	0	0
	170	1.54801e+06	5.31898e+06	762.335	0	1771.43	1119.21	0	1121.18	0	0	0	0
	171	2.90949e+06	2.17839e+07	70420.2	293829	429361	810960	1.49658e+06	554782	1978.25	0	0	0
	172	85617.8	91904.3	0	0	0	154.101	0	0	0	0	0	0
	173	167222	243265	243.332	0	2688.68	0	0	258.903	1972.39	0	97.6099	0
	175	78928.9	37685.4	0	0	0	0	0	0	0	0	0	0
	176	58862.2	14059.3	0	0	0	0	0	0	0	0	0	0
	199	73577.8	45442.9	789.699	0	0	104.509	1091.73	0	0	0	0	0
	200	252840	418433	3476.53	906.311	7454.91	463.504	6844.18	223.711	0	0	152.952	0
	201	1.17056e+06	2.20194e+06	56709.7	49530.5	40680.1	4384.2	20019.8	1089.01	0	0	0	639.044
	202	2.30232e+06	7.67794e+06	598976	102644	759494	142088	635220	14006.6	0	0	0	0
	269	225361	306536	0	0	0	438.708	9644.36	2512.91	0	0	0	0
	270	4.13708e+06	1.03498e+07	0	0	0	421662	2.41899e+06	1.82787e+06	214.004	0	0	0
	273	1.11437e+06	2.45473e+06	109.248	0	0	0	981.397	0	2507.69	0	0	605.869
	274	3.19863e+06	2.1361e+06	3.85027e+06	276167	2.24804e+06	87424.9	158250	4380.49	528342	12842	0	0
	279	5.16784e+06	6.28007e+06	0	0	0	282476	4.74573e+06	1.61059e+06	0	0	122.894	0
	280	1.05016e+06	864321	0	0	0	3102.61	870740	150684	0	0	6020	0
	281	1.51377e+07	1.33304e+07	3.60744e+06	442027	5.57278e+06	1.11757e+06	1.69085e+07	189295	96992	0	0	0
	282	2.33201e+07	2.24644e+07	5.64638e+06	1.86489e+06	6.11926e+06	1.55095e+06	5.18187e+06	37107.8	718842	381715	134.845	3562.6
	283	1.78861e+06	3.74464e+06	58584.3	101936	20217.4	5106.51	54403.4	3562.42	5384.77	2147.96	0	0
	284	1.4543e+07	1.28741e+07	9.12868e+06	1.78229e+06	26228.3	0	5.20829e+06	268518	2.98636e+06	675751	67.4611	0
	285	294982	399387	408.747	0	0	262.681	1974.52	0	2226.25	0	0	0
	286	822389	1.9841e+06	30602.2	25416.1	63871.6	3356.66	82154.4	7563.06	83872.4	13978.3	0	0
	287	1.00066e+06	1.56263e+06	13032.5	3632.42	14409	800.406	6890.09	730.53	4702.75	0	0	0
	288	255516	146326	154656	36302.3	109118	6554.14	95864.8	4761.88	33844.7	1276.25	0	0
	291	3.29093e+06	7.00117e+06	0	0	0	0	0	0	0	0	0	0
	292	4.64879e+06	9.33281e+06	0	0	0	0	0	0	0	0	0	0
	293	503004	1.30779e+06	0	0	0	0	0	0	0	0	0	0
	294	2.00667e+06	7.6678e+06	0	0	0	0	0	0	0	0	0	0
	310	3.25921e+06	4.02227e+07	440118	2.46666e+06	931424	1.21586e+06	1.51887e+06	2.93966e+06	669954	1.90584e+06	288256	438574
	311	4.30404e+06	2.0015e+07	1.41534e+06	4.42942e+06	802011	894823	949884	1.31173e+06	2523.68	0	22977.8	17890
	312	485613	4.6191e+06	0	0	0	0	0	752.594	0	0	616.106	0
	313	371902	1.54095e+06	0	0	0	0	0	0	0	0	0	0
